# Supplementary material for: Genome-wide identification, new classification, expression analysis and screening of drought & heat resistance related candidates in the RING zinc finger gene family of bread wheat (Triticum aestivum L.)
Source: BMC Genomics. 2022 Oct 7;23:696. doi: 10.1186/s12864-022-08905-x (PMC9547421; doi:10.1186/s12864-022-08905-x)
Supplement: Supplementary file 6 — Additional file 6: Table S3. The information of cis-acting elements on the promoters of T. aestivum RING-zf genes. [file 12864_2022_8905_MOESM6_ESM.xlsx]

## Sheet: Sheet1
ID	Start	End	Element	Sequence	Fuction
TraesCS1A02G112600.1	847	854	GARE-motif	TCTGTTG	gibberellin-responsive element
TraesCS1A02G112600.1	848	854	Myb-binding site	CAACAG	NO
TraesCS1A02G112600.1	509	517	ERE	ATTTTAAA	NO
TraesCS1A02G112600.1	554	562	ERE	ATTTTAAA	NO
TraesCS1A02G112600.1	623	629	Myb	CAACTG	NO
TraesCS1A02G112600.1	105	111	ARE	AAACCA	cis-acting regulatory element essential for the anaerobic induction
TraesCS1A02G112600.1	1493	1499	Sp1	GGGCGG	light responsive element
TraesCS1A02G112600.1	101	107	MYC	CATGTG	NO
TraesCS1A02G112600.1	794	800	MYC	CATGTG	NO
TraesCS1A02G112600.1	226	232	W box	TTGACC	NO
TraesCS1A02G112600.1	804	810	W box	TTGACC	NO
TraesCS1A02G112600.1	92	97	TATA-box	TATAA/TATA/TACAAAA	core promoter element around -30 of transcription start
TraesCS1A02G112600.1	93	97	TATA-box	TATAA/TATA/TACAAAA	core promoter element around -30 of transcription start
TraesCS1A02G112600.1	162	169	TATA-box	TATAA/TATA/TACAAAA	core promoter element around -30 of transcription start
TraesCS1A02G112600.1	187	191	TATA-box	TATAA/TATA/TACAAAA	core promoter element around -30 of transcription start
TraesCS1A02G112600.1	535	539	TATA-box	TATAA/TATA/TACAAAA	core promoter element around -30 of transcription start
TraesCS1A02G112600.1	595	599	TATA-box	TATAA/TATA/TACAAAA	core promoter element around -30 of transcription start
TraesCS1A02G112600.1	206	212	MYB-like sequence	TAACCA	NO
TraesCS1A02G112600.1	403	409	MYB-like sequence	TAACCA	NO
TraesCS1A02G112600.1	32	38	MYB	CAACAG/CAACCA/TAACCA	NO
TraesCS1A02G112600.1	206	212	MYB	CAACAG/CAACCA/TAACCA	NO
TraesCS1A02G112600.1	403	409	MYB	CAACAG/CAACCA/TAACCA	NO
TraesCS1A02G112600.1	627	633	MYB	CAACAG/CAACCA/TAACCA	NO
TraesCS1A02G112600.1	848	854	MYB	CAACAG/CAACCA/TAACCA	NO
TraesCS1A02G112600.1	391	396	STRE	AGGGG	NO
TraesCS1A02G112600.1	1382	1387	STRE	AGGGG	NO
TraesCS1A02G112600.1	1424	1429	STRE	AGGGG	NO
TraesCS1A02G112600.1	818	825	TATC-box	TATCCCA	cis-acting element involved in gibberellin-responsiveness
TraesCS1A02G112600.1	401	408	GT1-motif	GGTTAAT/GGTTAA	light responsive element
TraesCS1A02G112600.1	402	408	GT1-motif	GGTTAAT/GGTTAA	light responsive element
TraesCS1A02G112600.1	865	871	DRE core	GCCGAC	NO
TraesCS1A02G112600.1	623	629	MBS	CAACTG	MYB binding site involved in drought-inducibility
TraesCS1A02G112600.1	861	866	TGACG-motif	TGACG	cis-acting regulatory element involved in the MeJA-responsiveness
TraesCS1A02G137400.1	130	135	STRE	AGGGG	NO
TraesCS1A02G137400.1	285	290	STRE	AGGGG	NO
TraesCS1A02G137400.1	657	662	STRE	AGGGG	NO
TraesCS1A02G137400.1	1342	1347	STRE	AGGGG	NO
TraesCS1A02G137400.1	1435	1440	STRE	AGGGG	NO
TraesCS1A02G137400.1	937	943	WRE3	CCACCT	NO
TraesCS1A02G137400.1	770	775	ABRE	ACGTG	involved in the abscisic acid responsiveness
TraesCS1A02G137400.1	1466	1472	DRE core	GCCGAC	NO
TraesCS1A02G137400.1	11	16	TGACG-motif	TGACG	cis-acting regulatory element involved in the MeJA-responsiveness
TraesCS1A02G137400.1	1245	1250	TGACG-motif	TGACG	cis-acting regulatory element involved in the MeJA-responsiveness
TraesCS1A02G137400.1	239	246	AuxRR-core	GGTCCAT	involved in auxin responsiveness
TraesCS1A02G137400.1	898	908	GTGGC-motif	GATTCTGTGGC	part of a light responsive element
TraesCS1A02G137400.1	769	775	G-box	CACGTC	involved in light responsiveness
TraesCS1A02G137400.1	1037	1043	TGA-element	AACGAC	auxin-responsive element
TraesCS1A02G137400.1	638	644	ARE	AAACCA	cis-acting regulatory element essential for the anaerobic induction
TraesCS1A02G137400.1	555	559	TATA-box	TATAA/TATA/TACAAAA	core promoter element around -30 of transcription start
TraesCS1A02G137400.1	1107	1113	W box	TTGACC	NO
TraesCS1A02G137400.1	277	283	MYC	CATGTG	NO
TraesCS1A02G137400.1	882	888	MYC	CATGTG	NO
TraesCS1A02G137400.1	1104	1110	MYC	CATGTG	NO
TraesCS1A02G137400.1	1140	1146	MYC	CATGTG	NO
TraesCS1A02G137400.1	678	684	Sp1	GGGCGG	light responsive element
TraesCS1A02G198000.1	1103	1109	LTR	CCGAAA	involved in low-temperature responsiveness
TraesCS1A02G198000.1	1114	1120	LTR	CCGAAA	involved in low-temperature responsiveness
TraesCS1A02G198000.1	209	215	DRE core	GCCGAC	NO
TraesCS1A02G198000.1	197	203	MBS	CAACTG	MYB binding site involved in drought-inducibility
TraesCS1A02G198000.1	72	77	TGACG-motif	TGACG	cis-acting regulatory element involved in the MeJA-responsiveness
TraesCS1A02G198000.1	90	95	TGACG-motif	TGACG	cis-acting regulatory element involved in the MeJA-responsiveness
TraesCS1A02G198000.1	786	791	TGACG-motif	TGACG	cis-acting regulatory element involved in the MeJA-responsiveness
TraesCS1A02G198000.1	253	259	MYB	CAACAG/CAACCA/TAACCA	NO
TraesCS1A02G198000.1	373	379	MYB	CAACAG/CAACCA/TAACCA	NO
TraesCS1A02G198000.1	807	813	MYB	CAACAG/CAACCA/TAACCA	NO
TraesCS1A02G198000.1	901	907	MYB	CAACAG/CAACCA/TAACCA	NO
TraesCS1A02G198000.1	134	140	MYB recognition site	CCGTTG	NO
TraesCS1A02G198000.1	701	707	MYB recognition site	CCGTTG	NO
TraesCS1A02G198000.1	141	147	WRE3	CCACCT	NO
TraesCS1A02G198000.1	129	134	ABRE	ACGTG	involved in the abscisic acid responsiveness
TraesCS1A02G198000.1	381	386	STRE	AGGGG	NO
TraesCS1A02G198000.1	581	586	STRE	AGGGG	NO
TraesCS1A02G198000.1	600	605	STRE	AGGGG	NO
TraesCS1A02G198000.1	1032	1037	STRE	AGGGG	NO
TraesCS1A02G198000.1	1418	1423	STRE	AGGGG	NO
TraesCS1A02G198000.1	197	203	Myb	CAACAG/CAACCA/TAACCA	NO
TraesCS1A02G198000.1	848	855	TCCC-motif	TCTCCCT	part of a light responsive element
TraesCS1A02G198000.1	1353	1360	TCCC-motif	TCTCCCT	part of a light responsive element
TraesCS1A02G198000.1	113	119	MYC	CATGTG	NO
TraesCS1A02G198000.1	121	127	MYC	CATGTG	NO
TraesCS1A02G198000.1	568	574	MYC	CATGTG	NO
TraesCS1A02G198000.1	575	581	MYC	CATGTG	NO
TraesCS1A02G198000.1	731	737	MYC	CATGTG	NO
TraesCS1A02G198000.1	1341	1347	Sp1	GGGCGG	light responsive element
TraesCS1A02G198000.1	241	245	TATA-box	TATAA/TATA/TACAAAA	core promoter element around -30 of transcription start
TraesCS1A02G198000.1	328	335	TATA-box	TATAA/TATA/TACAAAA	core promoter element around -30 of transcription start
TraesCS1A02G198000.1	501	508	TATA-box	TATAA/TATA/TACAAAA	core promoter element around -30 of transcription start
TraesCS1A02G198000.1	920	926	TATA-box	TATAA/TATA/TACAAAA	core promoter element around -30 of transcription start
TraesCS1A02G198000.1	921	925	TATA-box	TATAA/TATA/TACAAAA	core promoter element around -30 of transcription start
TraesCS1A02G198000.1	1025	1034	TATA-box	TATAA/TATA/TACAAAA	core promoter element around -30 of transcription start
TraesCS1A02G198000.1	1303	1307	TATA-box	TATAA/TATA/TACAAAA	core promoter element around -30 of transcription start
TraesCS1A02G198000.1	372	379	GARE-motif	TCTGTTG	gibberellin-responsive element
TraesCS1A02G198000.1	806	813	GARE-motif	TCTGTTG	gibberellin-responsive element
TraesCS1A02G198000.1	129	135	G-box	CACGTC	involved in light responsiveness
TraesCS1A02G198000.1	1154	1160	G-box	CACGTC	involved in light responsiveness
TraesCS1A02G198000.1	1072	1078	TGA-element	AACGAC	auxin-responsive element
TraesCS1A02G198000.1	373	379	Myb-binding site	CAACAG	NO
TraesCS1A02G198000.1	807	813	Myb-binding site	CAACAG	NO
TraesCS1A02G198000.1	901	907	Myb-binding site	CAACAG	NO
TraesCS1A02G198000.1	316	325	WUN-motif	AAATTTCCT	wound-responsive element
TraesCS1A02G263800.1	1068	1073	TGACG-motif	TGACG	cis-acting regulatory element involved in the MeJA-responsiveness
TraesCS1A02G263800.1	1384	1389	TGACG-motif	TGACG	cis-acting regulatory element involved in the MeJA-responsiveness
TraesCS1A02G263800.1	437	444	GCN4_motif	TGAGTCA	involved in endosperm expression
TraesCS1A02G263800.1	390	396	MBS	CAACTG	MYB binding site involved in drought-inducibility
TraesCS1A02G263800.1	790	796	MBS	CAACTG	MYB binding site involved in drought-inducibility
TraesCS1A02G263800.1	866	872	MBS	CAACTG	MYB binding site involved in drought-inducibility
TraesCS1A02G263800.1	949	955	MBS	CAACTG	MYB binding site involved in drought-inducibility
TraesCS1A02G263800.1	944	949	STRE	AGGGG	NO
TraesCS1A02G263800.1	1104	1109	STRE	AGGGG	NO
TraesCS1A02G263800.1	86	92	MYB	CAACAG/CAACCA/TAACCA	NO
TraesCS1A02G263800.1	280	286	MYB	CAACAG/CAACCA/TAACCA	NO
TraesCS1A02G263800.1	378	384	MYB	CAACAG/CAACCA/TAACCA	NO
TraesCS1A02G263800.1	745	754	ABRE	ACGTG	involved in the abscisic acid responsiveness
TraesCS1A02G263800.1	748	753	ABRE	ACGTG	involved in the abscisic acid responsiveness
TraesCS1A02G263800.1	753	758	ABRE	ACGTG	involved in the abscisic acid responsiveness
TraesCS1A02G263800.1	780	785	ABRE	ACGTG	involved in the abscisic acid responsiveness
TraesCS1A02G263800.1	852	857	ABRE	ACGTG	involved in the abscisic acid responsiveness
TraesCS1A02G263800.1	1070	1075	ABRE	ACGTG	involved in the abscisic acid responsiveness
TraesCS1A02G263800.1	1170	1175	ABRE	ACGTG	involved in the abscisic acid responsiveness
TraesCS1A02G263800.1	1225	1231	ABRE	ACGTG	involved in the abscisic acid responsiveness
TraesCS1A02G263800.1	1226	1231	ABRE	ACGTG	involved in the abscisic acid responsiveness
TraesCS1A02G263800.1	1250	1256	ABRE	ACGTG	involved in the abscisic acid responsiveness
TraesCS1A02G263800.1	1251	1256	ABRE	ACGTG	involved in the abscisic acid responsiveness
TraesCS1A02G263800.1	1382	1387	ABRE	ACGTG	involved in the abscisic acid responsiveness
TraesCS1A02G263800.1	40	46	WRE3	CCACCT	NO
TraesCS1A02G263800.1	922	928	WRE3	CCACCT	NO
TraesCS1A02G263800.1	359	367	TATA-box	TATAA/TATA/TACAAAA	core promoter element around -30 of transcription start
TraesCS1A02G263800.1	86	92	MYB-like sequence	TAACCA	NO
TraesCS1A02G263800.1	566	575	GATA-motif	AAGGATAAGG	part of a light responsive element
TraesCS1A02G263800.1	402	408	MYC	CATGTG	NO
TraesCS1A02G263800.1	511	517	MYC	CATGTG	NO
TraesCS1A02G263800.1	763	769	MYC	CATGTG	NO
TraesCS1A02G263800.1	889	895	MYC	CATGTG	NO
TraesCS1A02G263800.1	956	962	MYC	CATGTG	NO
TraesCS1A02G263800.1	972	978	MYC	CATGTG	NO
TraesCS1A02G263800.1	1029	1035	MYC	CATGTG	NO
TraesCS1A02G263800.1	1242	1248	MYC	CATGTG	NO
TraesCS1A02G263800.1	747	753	ABRE4	CACGTA	NO
TraesCS1A02G263800.1	851	857	ABRE4	CACGTA	NO
TraesCS1A02G263800.1	1169	1175	ABRE4	CACGTA	NO
TraesCS1A02G263800.1	390	396	Myb	CAACTG	NO
TraesCS1A02G263800.1	790	796	Myb	CAACTG	NO
TraesCS1A02G263800.1	866	872	Myb	CAACTG	NO
TraesCS1A02G263800.1	949	955	Myb	CAACTG	NO
TraesCS1A02G263800.1	445	451	ARE	AAACCA	cis-acting regulatory element essential for the anaerobic induction
TraesCS1A02G263800.1	629	635	ARE	AAACCA	cis-acting regulatory element essential for the anaerobic induction
TraesCS1A02G263800.1	753	759	G-Box	CACGTC	involved in light responsiveness
TraesCS1A02G263800.1	780	786	G-Box	CACGTC	involved in light responsiveness
TraesCS1A02G263800.1	953	963	G-Box	CACGTC	involved in light responsiveness
TraesCS1A02G263800.1	1225	1231	G-Box	CACGTC	involved in light responsiveness
TraesCS1A02G263800.1	1250	1256	G-Box	CACGTC	involved in light responsiveness
TraesCS1A02G263800.1	747	753	ABRE3a	TACGTG	NO
TraesCS1A02G263800.1	851	857	ABRE3a	TACGTG	NO
TraesCS1A02G263800.1	1169	1175	ABRE3a	TACGTG	NO
TraesCS1A02G263800.1	24	30	TGA-element	AACGAC	auxin-responsive element
TraesCS1A02G263800.1	747	753	G-box	CACGTC	involved in light responsiveness
TraesCS1A02G263800.1	851	857	G-box	CACGTC	involved in light responsiveness
TraesCS1A02G263800.1	1069	1075	G-box	CACGTC	involved in light responsiveness
TraesCS1A02G263800.1	1169	1175	G-box	CACGTC	involved in light responsiveness
TraesCS1A02G263800.1	1224	1232	G-box	CACGTC	involved in light responsiveness
TraesCS1A02G263800.1	1225	1231	G-box	CACGTC	involved in light responsiveness
TraesCS1A02G263800.1	1250	1256	G-box	CACGTC	involved in light responsiveness
TraesCS1A02G263800.1	1382	1388	G-box	CACGTC	involved in light responsiveness
TraesCS1A02G263800.1	1363	1370	AuxRR-core	GGTCCAT	involved in auxin responsiveness
TraesCS1A02G296100.1	531	539	RY-element	CATGCATG	cis-acting regulatory element involved in seed-specific regulation
TraesCS1A02G296100.1	548	556	RY-element	CATGCATG	cis-acting regulatory element involved in seed-specific regulation
TraesCS1A02G296100.1	170	176	Myb-binding site	CAACAG	NO
TraesCS1A02G296100.1	200	206	Myb-binding site	CAACAG	NO
TraesCS1A02G296100.1	251	259	WUN-motif	AAATTTCCT	wound-responsive element
TraesCS1A02G296100.1	127	133	Myb	CAACTG	NO
TraesCS1A02G296100.1	348	354	Myb	CAACTG	NO
TraesCS1A02G296100.1	739	745	ARE	AAACCA	cis-acting regulatory element essential for the anaerobic induction
TraesCS1A02G296100.1	1026	1032	MYC	CATGTG	NO
TraesCS1A02G296100.1	1028	1034	MYC	CATGTG	NO
TraesCS1A02G296100.1	956	962	Sp1	GGGCGG	light responsive element
TraesCS1A02G296100.1	998	1004	Sp1	GGGCGG	light responsive element
TraesCS1A02G296100.1	1011	1017	Sp1	GGGCGG	light responsive element
TraesCS1A02G296100.1	1015	1021	Sp1	GGGCGG	light responsive element
TraesCS1A02G296100.1	1019	1025	Sp1	GGGCGG	light responsive element
TraesCS1A02G296100.1	7	13	TATA-box	TATAA/TATA/TACAAAA	core promoter element around -30 of transcription start
TraesCS1A02G296100.1	8	12	TATA-box	TATAA/TATA/TACAAAA	core promoter element around -30 of transcription start
TraesCS1A02G296100.1	130	135	TATA-box	TATAA/TATA/TACAAAA	core promoter element around -30 of transcription start
TraesCS1A02G296100.1	131	135	TATA-box	TATAA/TATA/TACAAAA	core promoter element around -30 of transcription start
TraesCS1A02G296100.1	295	303	TATA-box	TATAA/TATA/TACAAAA	core promoter element around -30 of transcription start
TraesCS1A02G296100.1	300	306	TATA-box	TATAA/TATA/TACAAAA	core promoter element around -30 of transcription start
TraesCS1A02G296100.1	301	305	TATA-box	TATAA/TATA/TACAAAA	core promoter element around -30 of transcription start
TraesCS1A02G296100.1	731	737	TATA-box	TATAA/TATA/TACAAAA	core promoter element around -30 of transcription start
TraesCS1A02G296100.1	732	736	TATA-box	TATAA/TATA/TACAAAA	core promoter element around -30 of transcription start
TraesCS1A02G296100.1	790	796	TATA-box	TATAA/TATA/TACAAAA	core promoter element around -30 of transcription start
TraesCS1A02G296100.1	791	795	TATA-box	TATAA/TATA/TACAAAA	core promoter element around -30 of transcription start
TraesCS1A02G296100.1	995	1001	GC-motif	CCCCCG	enhancer-like element involved in anoxic specific inducibility
TraesCS1A02G296100.1	107	113	MYB	CAACAG/CAACCA/TAACCA	NO
TraesCS1A02G296100.1	170	176	MYB	CAACAG/CAACCA/TAACCA	NO
TraesCS1A02G296100.1	200	206	MYB	CAACAG/CAACCA/TAACCA	NO
TraesCS1A02G296100.1	940	946	MYB	CAACAG/CAACCA/TAACCA	NO
TraesCS1A02G296100.1	1421	1427	MYB	CAACAG/CAACCA/TAACCA	NO
TraesCS1A02G296100.1	423	429	WRE3	CCACCT	NO
TraesCS1A02G296100.1	722	728	WRE3	CCACCT	NO
TraesCS1A02G296100.1	946	952	WRE3	CCACCT	NO
TraesCS1A02G296100.1	1414	1420	WRE3	CCACCT	NO
TraesCS1A02G296100.1	871	876	STRE	AGGGG	NO
TraesCS1A02G296100.1	896	901	STRE	AGGGG	NO
TraesCS1A02G296100.1	915	920	STRE	AGGGG	NO
TraesCS1A02G296100.1	259	264	TGACG-motif	TGACG	cis-acting regulatory element involved in the MeJA-responsiveness
TraesCS1A02G296100.1	396	401	TGACG-motif	TGACG	cis-acting regulatory element involved in the MeJA-responsiveness
TraesCS1B02G118800.1	838	851	AT1-motif	AATTATTTTTTATT	part of a light responsive module
TraesCS1B02G118800.1	97	103	LTR	CCGAAA	involved in low-temperature responsiveness
TraesCS1B02G118800.1	653	659	LTR	CCGAAA	involved in low-temperature responsiveness
TraesCS1B02G118800.1	350	357	Myc	CATGTG	NO
TraesCS1B02G118800.1	1103	1109	MBS	CAACTG	MYB binding site involved in drought-inducibility
TraesCS1B02G118800.1	90	95	TGACG-motif	TGACG	cis-acting regulatory element involved in the MeJA-responsiveness
TraesCS1B02G118800.1	1437	1442	TGACG-motif	TGACG	cis-acting regulatory element involved in the MeJA-responsiveness
TraesCS1B02G118800.1	737	743	MYB	CAACAG/CAACCA/TAACCA	NO
TraesCS1B02G118800.1	951	957	MYB	CAACAG/CAACCA/TAACCA	NO
TraesCS1B02G118800.1	911	917	MYB recognition site	CCGTTG	NO
TraesCS1B02G118800.1	758	763	ABRE	ACGTG	involved in the abscisic acid responsiveness
TraesCS1B02G118800.1	576	581	STRE	AGGGG	NO
TraesCS1B02G118800.1	921	926	STRE	AGGGG	NO
TraesCS1B02G118800.1	1310	1315	STRE	AGGGG	NO
TraesCS1B02G118800.1	506	513	GT1-motif	GGTTAAT/GGTTAA	light responsive element
TraesCS1B02G118800.1	507	513	GT1-motif	GGTTAAT/GGTTAA	light responsive element
TraesCS1B02G118800.1	352	358	TCT-motif	TCTTAC	part of a light responsive element
TraesCS1B02G118800.1	61	68	MRE	AACCTAA	MYB binding site involved in light responsiveness
TraesCS1B02G118800.1	1103	1109	Myb	CAACTG	NO
TraesCS1B02G118800.1	954	960	W box	TTGACC	NO
TraesCS1B02G118800.1	730	736	MYC	CATGTG	NO
TraesCS1B02G118800.1	1095	1101	MYC	CATGTG	NO
TraesCS1B02G118800.1	1411	1417	MYC	CATGTG	NO
TraesCS1B02G118800.1	106	112	Sp1	GGGCGG	light responsive element
TraesCS1B02G118800.1	144	150	Sp1	GGGCGG	light responsive element
TraesCS1B02G118800.1	181	187	Sp1	GGGCGG	light responsive element
TraesCS1B02G118800.1	958	964	Sp1	GGGCGG	light responsive element
TraesCS1B02G118800.1	21	27	TATA-box	TATAA/TATA/TACAAAA	core promoter element around -30 of transcription start
TraesCS1B02G118800.1	22	27	TATA-box	TATAA/TATA/TACAAAA	core promoter element around -30 of transcription start
TraesCS1B02G118800.1	23	27	TATA-box	TATAA/TATA/TACAAAA	core promoter element around -30 of transcription start
TraesCS1B02G118800.1	411	417	TATA-box	TATAA/TATA/TACAAAA	core promoter element around -30 of transcription start
TraesCS1B02G118800.1	412	416	TATA-box	TATAA/TATA/TACAAAA	core promoter element around -30 of transcription start
TraesCS1B02G118800.1	481	490	TATA-box	TATAA/TATA/TACAAAA	core promoter element around -30 of transcription start
TraesCS1B02G118800.1	484	489	TATA-box	TATAA/TATA/TACAAAA	core promoter element around -30 of transcription start
TraesCS1B02G118800.1	485	489	TATA-box	TATAA/TATA/TACAAAA	core promoter element around -30 of transcription start
TraesCS1B02G118800.1	1141	1147	TATA-box	TATAA/TATA/TACAAAA	core promoter element around -30 of transcription start
TraesCS1B02G118800.1	1142	1147	TATA-box	TATAA/TATA/TACAAAA	core promoter element around -30 of transcription start
TraesCS1B02G118800.1	1143	1147	TATA-box	TATAA/TATA/TACAAAA	core promoter element around -30 of transcription start
TraesCS1B02G118800.1	1162	1166	TATA-box	TATAA/TATA/TACAAAA	core promoter element around -30 of transcription start
TraesCS1B02G118800.1	1171	1180	TATA-box	TATAA/TATA/TACAAAA	core promoter element around -30 of transcription start
TraesCS1B02G118800.1	1172	1178	TATA-box	TATAA/TATA/TACAAAA	core promoter element around -30 of transcription start
TraesCS1B02G118800.1	1173	1179	TATA-box	TATAA/TATA/TACAAAA	core promoter element around -30 of transcription start
TraesCS1B02G118800.1	1174	1180	TATA-box	TATAA/TATA/TACAAAA	core promoter element around -30 of transcription start
TraesCS1B02G118800.1	1175	1181	TATA-box	TATAA/TATA/TACAAAA	core promoter element around -30 of transcription start
TraesCS1B02G118800.1	1177	1181	TATA-box	TATAA/TATA/TACAAAA	core promoter element around -30 of transcription start
TraesCS1B02G118800.1	737	744	GARE-motif	TCTGTTG	gibberellin-responsive element
TraesCS1B02G118800.1	1440	1447	P-box	CCTTTTG	gibberellin-responsive element
TraesCS1B02G118800.1	208	214	G-box	CACGTC	involved in light responsiveness
TraesCS1B02G118800.1	725	731	G-box	CACGTC	involved in light responsiveness
TraesCS1B02G118800.1	757	763	G-box	CACGTC	involved in light responsiveness
TraesCS1B02G118800.1	737	743	Myb-binding site	CAACAG	NO
TraesCS1B02G118800.1	1173	1179	AT~TATA-box	TATATA	NO
TraesCS1B02G118800.1	1175	1181	AT~TATA-box	TATATA	NO
TraesCS1B02G118800.1	554	562	ERE	ATTTTAAA	NO
TraesCS1B02G132800.1	1161	1167	DRE core	GCCGAC	NO
TraesCS1B02G132800.1	1157	1162	TGACG-motif	TGACG	cis-acting regulatory element involved in the MeJA-responsiveness
TraesCS1B02G132800.1	203	210	AAGAA-motif	GAAAGAA	NO
TraesCS1B02G132800.1	919	925	MBS	CAACTG	MYB binding site involved in drought-inducibility
TraesCS1B02G132800.1	210	215	STRE	AGGGG	NO
TraesCS1B02G132800.1	438	443	STRE	AGGGG	NO
TraesCS1B02G132800.1	1027	1032	STRE	AGGGG	NO
TraesCS1B02G132800.1	1216	1221	STRE	AGGGG	NO
TraesCS1B02G132800.1	1353	1358	STRE	AGGGG	NO
TraesCS1B02G132800.1	1366	1371	STRE	AGGGG	NO
TraesCS1B02G132800.1	1374	1379	STRE	AGGGG	NO
TraesCS1B02G132800.1	1384	1389	STRE	AGGGG	NO
TraesCS1B02G132800.1	420	429	ABRE	ACGTG	involved in the abscisic acid responsiveness
TraesCS1B02G132800.1	357	363	MYB recognition site	CCGTTG	NO
TraesCS1B02G132800.1	626	632	MYB	CAACAG/CAACCA/TAACCA	NO
TraesCS1B02G132800.1	673	679	MYB	CAACAG/CAACCA/TAACCA	NO
TraesCS1B02G132800.1	687	693	MYB	CAACAG/CAACCA/TAACCA	NO
TraesCS1B02G132800.1	923	929	MYB	CAACAG/CAACCA/TAACCA	NO
TraesCS1B02G132800.1	1144	1150	MYB	CAACAG/CAACCA/TAACCA	NO
TraesCS1B02G132800.1	1308	1314	MYB	CAACAG/CAACCA/TAACCA	NO
TraesCS1B02G132800.1	391	397	TCT-motif	TCTTAC	part of a light responsive element
TraesCS1B02G132800.1	293	300	GT1-motif	GGTTAAT/GGTTAA	light responsive element
TraesCS1B02G132800.1	919	925	Myb	CAACTG	NO
TraesCS1B02G132800.1	299	303	TATA-box	TATAA/TATA/TACAAAA	core promoter element around -30 of transcription start
TraesCS1B02G132800.1	321	328	TATA-box	TATAA/TATA/TACAAAA	core promoter element around -30 of transcription start
TraesCS1B02G132800.1	822	826	TATA-box	TATAA/TATA/TACAAAA	core promoter element around -30 of transcription start
TraesCS1B02G132800.1	891	895	TATA-box	TATAA/TATA/TACAAAA	core promoter element around -30 of transcription start
TraesCS1B02G132800.1	978	985	TATA-box	TATAA/TATA/TACAAAA	core promoter element around -30 of transcription start
TraesCS1B02G132800.1	979	985	TATA-box	TATAA/TATA/TACAAAA	core promoter element around -30 of transcription start
TraesCS1B02G132800.1	980	985	TATA-box	TATAA/TATA/TACAAAA	core promoter element around -30 of transcription start
TraesCS1B02G132800.1	981	985	TATA-box	TATAA/TATA/TACAAAA	core promoter element around -30 of transcription start
TraesCS1B02G132800.1	993	999	TATA-box	TATAA/TATA/TACAAAA	core promoter element around -30 of transcription start
TraesCS1B02G132800.1	994	998	TATA-box	TATAA/TATA/TACAAAA	core promoter element around -30 of transcription start
TraesCS1B02G132800.1	315	321	MYC	CATGTG	NO
TraesCS1B02G132800.1	705	711	MYC	CATGTG	NO
TraesCS1B02G132800.1	1090	1096	MYC	CATGTG	NO
TraesCS1B02G132800.1	1438	1444	Sp1	GGGCGG	light responsive element
TraesCS1B02G132800.1	1443	1449	Sp1	GGGCGG	light responsive element
TraesCS1B02G132800.1	1493	1499	Sp1	GGGCGG	light responsive element
TraesCS1B02G132800.1	861	867	W box	TTGACC	NO
TraesCS1B02G132800.1	1100	1106	W box	TTGACC	NO
TraesCS1B02G132800.1	1143	1150	GARE-motif	TCTGTTG	gibberellin-responsive element
TraesCS1B02G132800.1	1307	1314	GARE-motif	TCTGTTG	gibberellin-responsive element
TraesCS1B02G132800.1	589	597	GA-motif	ATAGATAA	part of a light responsive element
TraesCS1B02G132800.1	626	632	Myb-binding site	CAACAG	NO
TraesCS1B02G132800.1	1144	1150	Myb-binding site	CAACAG	NO
TraesCS1B02G132800.1	1308	1314	Myb-binding site	CAACAG	NO
TraesCS1B02G132800.1	61	67	G-box	CACGTC	involved in light responsiveness
TraesCS1B02G152000.1	539	545	G-box	CACGTC	involved in light responsiveness
TraesCS1B02G152000.1	1250	1256	G-box	CACGTC	involved in light responsiveness
TraesCS1B02G152000.1	342	348	TGA-element	AACGAC	auxin-responsive element
TraesCS1B02G152000.1	1269	1275	TGA-element	AACGAC	auxin-responsive element
TraesCS1B02G152000.1	1285	1291	TGA-element	AACGAC	auxin-responsive element
TraesCS1B02G152000.1	262	268	AT~TATA-box	TATATA	NO
TraesCS1B02G152000.1	392	398	AT~TATA-box	TATATA	NO
TraesCS1B02G152000.1	810	816	AT~TATA-box	TATATA	NO
TraesCS1B02G152000.1	545	551	G-Box	CACGTC	involved in light responsiveness
TraesCS1B02G152000.1	185	194	I-box	GTATAAGGCC	part of a light responsive element
TraesCS1B02G152000.1	493	499	W box	TTGACC	NO
TraesCS1B02G152000.1	60	66	MYC	CATGTG	NO
TraesCS1B02G152000.1	171	177	MYC	CATGTG	NO
TraesCS1B02G152000.1	262	268	TATA-box	TATAA/TATA/TACAAAA	core promoter element around -30 of transcription start
TraesCS1B02G152000.1	263	269	TATA-box	TATAA/TATA/TACAAAA	core promoter element around -30 of transcription start
TraesCS1B02G152000.1	264	268	TATA-box	TATAA/TATA/TACAAAA	core promoter element around -30 of transcription start
TraesCS1B02G152000.1	391	397	TATA-box	TATAA/TATA/TACAAAA	core promoter element around -30 of transcription start
TraesCS1B02G152000.1	392	398	TATA-box	TATAA/TATA/TACAAAA	core promoter element around -30 of transcription start
TraesCS1B02G152000.1	393	399	TATA-box	TATAA/TATA/TACAAAA	core promoter element around -30 of transcription start
TraesCS1B02G152000.1	394	398	TATA-box	TATAA/TATA/TACAAAA	core promoter element around -30 of transcription start
TraesCS1B02G152000.1	808	814	TATA-box	TATAA/TATA/TACAAAA	core promoter element around -30 of transcription start
TraesCS1B02G152000.1	809	816	TATA-box	TATAA/TATA/TACAAAA	core promoter element around -30 of transcription start
TraesCS1B02G152000.1	810	816	TATA-box	TATAA/TATA/TACAAAA	core promoter element around -30 of transcription start
TraesCS1B02G152000.1	812	816	TATA-box	TATAA/TATA/TACAAAA	core promoter element around -30 of transcription start
TraesCS1B02G152000.1	833	839	TATA-box	TATAA/TATA/TACAAAA	core promoter element around -30 of transcription start
TraesCS1B02G152000.1	834	839	TATA-box	TATAA/TATA/TACAAAA	core promoter element around -30 of transcription start
TraesCS1B02G152000.1	835	839	TATA-box	TATAA/TATA/TACAAAA	core promoter element around -30 of transcription start
TraesCS1B02G152000.1	858	862	TATA-box	TATAA/TATA/TACAAAA	core promoter element around -30 of transcription start
TraesCS1B02G152000.1	973	979	TATA-box	TATAA/TATA/TACAAAA	core promoter element around -30 of transcription start
TraesCS1B02G152000.1	974	979	TATA-box	TATAA/TATA/TACAAAA	core promoter element around -30 of transcription start
TraesCS1B02G152000.1	975	979	TATA-box	TATAA/TATA/TACAAAA	core promoter element around -30 of transcription start
TraesCS1B02G152000.1	1134	1138	TATA-box	TATAA/TATA/TACAAAA	core promoter element around -30 of transcription start
TraesCS1B02G152000.1	1185	1189	TATA-box	TATAA/TATA/TACAAAA	core promoter element around -30 of transcription start
TraesCS1B02G152000.1	1010	1016	MYB-like sequence	TAACCA	NO
TraesCS1B02G152000.1	513	519	ARE	AAACCA	cis-acting regulatory element essential for the anaerobic induction
TraesCS1B02G152000.1	1099	1105	ARE	AAACCA	cis-acting regulatory element essential for the anaerobic induction
TraesCS1B02G152000.1	1108	1114	ARE	AAACCA	cis-acting regulatory element essential for the anaerobic induction
TraesCS1B02G152000.1	1159	1165	ARE	AAACCA	cis-acting regulatory element essential for the anaerobic induction
TraesCS1B02G152000.1	819	826	GT1-motif	GGTTAAT/GGTTAA	light responsive element
TraesCS1B02G152000.1	820	826	GT1-motif	GGTTAAT/GGTTAA	light responsive element
TraesCS1B02G152000.1	957	963	GT1-motif	GGTTAAT/GGTTAA	light responsive element
TraesCS1B02G152000.1	416	424	LAMP-element	CTTTATCA	part of a light responsive element
TraesCS1B02G152000.1	1010	1016	MYB	CAACAG/CAACCA/TAACCA	NO
TraesCS1B02G152000.1	545	550	ABRE	ACGTG	involved in the abscisic acid responsiveness
TraesCS1B02G152000.1	1246	1253	ABRE	ACGTG	involved in the abscisic acid responsiveness
TraesCS1B02G152000.1	233	239	WRE3	CCACCT	NO
TraesCS1B02G152000.1	631	637	WRE3	CCACCT	NO
TraesCS1B02G152000.1	757	764	TATC-box	TATCCCA	cis-acting element involved in gibberellin-responsiveness
TraesCS1B02G152000.1	251	256	STRE	AGGGG	NO
TraesCS1B02G152000.1	1054	1059	STRE	AGGGG	NO
TraesCS1B02G152000.1	1343	1348	STRE	AGGGG	NO
TraesCS1B02G152000.1	1348	1353	STRE	AGGGG	NO
TraesCS1B02G152000.1	562	567	TGACG-motif	TGACG	cis-acting regulatory element involved in the MeJA-responsiveness
TraesCS1B02G152000.1	1466	1472	DRE core	GCCGAC	NO
TraesCS1B02G212700.1	794	800	GT1-motif	GGTTAAT/GGTTAA	light responsive element
TraesCS1B02G212700.1	865	871	GT1-motif	GGTTAAT/GGTTAA	light responsive element
TraesCS1B02G212700.1	1128	1135	MRE	AACCTAA	MYB binding site involved in light responsiveness
TraesCS1B02G212700.1	161	167	MYB	CAACAG/CAACCA/TAACCA	NO
TraesCS1B02G212700.1	864	870	MYB	CAACAG/CAACCA/TAACCA	NO
TraesCS1B02G212700.1	973	979	MYB	CAACAG/CAACCA/TAACCA	NO
TraesCS1B02G212700.1	1083	1088	ABRE	ACGTG	involved in the abscisic acid responsiveness
TraesCS1B02G212700.1	1418	1423	STRE	AGGGG	NO
TraesCS1B02G212700.1	357	364	AAGAA-motif	GAAAGAA	NO
TraesCS1B02G212700.1	1151	1157	DRE core	GCCGAC	NO
TraesCS1B02G212700.1	1082	1088	G-box	CACGTC	involved in light responsiveness
TraesCS1B02G212700.1	1082	1088	ABRE3a	TACGTG	NO
TraesCS1B02G212700.1	969	975	MYC	CATGTG	NO
TraesCS1B02G212700.1	1296	1302	TATA-box	TATAA/TATA/TACAAAA	core promoter element around -30 of transcription start
TraesCS1B02G212700.1	1297	1302	TATA-box	TATAA/TATA/TACAAAA	core promoter element around -30 of transcription start
TraesCS1B02G212700.1	1298	1302	TATA-box	TATAA/TATA/TACAAAA	core promoter element around -30 of transcription start
TraesCS1B02G212700.1	864	870	MYB-like sequence	TAACCA	NO
TraesCS1B02G212700.1	868	874	Myb	CAACTG	NO
TraesCS1B02G212700.1	1294	1303	ATCT-motif	AATCTAATCC	part of a conserved DNA module involved in light responsiveness
TraesCS1B02G212700.1	1082	1088	ABRE4	CACGTA	NO
TraesCS1B02G212700.1	238	246	re2f-1	GCGGGAAA	NO
TraesCS1B02G274400.1	319	326	AuxRR-core	GGTCCAT	involved in auxin responsiveness
TraesCS1B02G274400.1	1371	1378	AuxRR-core	GGTCCAT	involved in auxin responsiveness
TraesCS1B02G274400.1	919	925	AT~TATA-box	TATATA	NO
TraesCS1B02G274400.1	562	568	Myb-binding site	CAACAG	NO
TraesCS1B02G274400.1	179	185	G-box	CACGTC	involved in light responsiveness
TraesCS1B02G274400.1	426	432	G-box	CACGTC	involved in light responsiveness
TraesCS1B02G274400.1	1388	1394	G-box	CACGTC	involved in light responsiveness
TraesCS1B02G274400.1	426	432	ABRE3a	TACGTG	NO
TraesCS1B02G274400.1	426	432	ABRE4	CACGTA	NO
TraesCS1B02G274400.1	295	304	ATC-motif	AGCTATCCA	part of a conserved DNA module involved in light responsiveness
TraesCS1B02G274400.1	716	722	MYB-like sequence	TAACCA	NO
TraesCS1B02G274400.1	158	164	TATA-box	TATAA/TATA/TACAAAA	core promoter element around -30 of transcription start
TraesCS1B02G274400.1	159	163	TATA-box	TATAA/TATA/TACAAAA	core promoter element around -30 of transcription start
TraesCS1B02G274400.1	190	195	TATA-box	TATAA/TATA/TACAAAA	core promoter element around -30 of transcription start
TraesCS1B02G274400.1	191	195	TATA-box	TATAA/TATA/TACAAAA	core promoter element around -30 of transcription start
TraesCS1B02G274400.1	288	294	TATA-box	TATAA/TATA/TACAAAA	core promoter element around -30 of transcription start
TraesCS1B02G274400.1	290	294	TATA-box	TATAA/TATA/TACAAAA	core promoter element around -30 of transcription start
TraesCS1B02G274400.1	396	400	TATA-box	TATAA/TATA/TACAAAA	core promoter element around -30 of transcription start
TraesCS1B02G274400.1	556	560	TATA-box	TATAA/TATA/TACAAAA	core promoter element around -30 of transcription start
TraesCS1B02G274400.1	629	633	TATA-box	TATAA/TATA/TACAAAA	core promoter element around -30 of transcription start
TraesCS1B02G274400.1	886	893	TATA-box	TATAA/TATA/TACAAAA	core promoter element around -30 of transcription start
TraesCS1B02G274400.1	913	917	TATA-box	TATAA/TATA/TACAAAA	core promoter element around -30 of transcription start
TraesCS1B02G274400.1	919	925	TATA-box	TATAA/TATA/TACAAAA	core promoter element around -30 of transcription start
TraesCS1B02G274400.1	920	926	TATA-box	TATAA/TATA/TACAAAA	core promoter element around -30 of transcription start
TraesCS1B02G274400.1	921	925	TATA-box	TATAA/TATA/TACAAAA	core promoter element around -30 of transcription start
TraesCS1B02G274400.1	955	962	TATA-box	TATAA/TATA/TACAAAA	core promoter element around -30 of transcription start
TraesCS1B02G274400.1	1406	1412	W box	TTGACC	NO
TraesCS1B02G274400.1	164	170	MYC	CATGTG	NO
TraesCS1B02G274400.1	519	526	GATA-motif	AAGGATAAGG	part of a light responsive element
TraesCS1B02G274400.1	602	609	GATA-motif	AAGGATAAGG	part of a light responsive element
TraesCS1B02G274400.1	697	704	TATC-box	TATCCCA	cis-acting element involved in gibberellin-responsiveness
TraesCS1B02G274400.1	20	25	STRE	AGGGG	NO
TraesCS1B02G274400.1	105	110	STRE	AGGGG	NO
TraesCS1B02G274400.1	85	91	WRE3	CCACCT	NO
TraesCS1B02G274400.1	426	431	ABRE	ACGTG	involved in the abscisic acid responsiveness
TraesCS1B02G274400.1	1388	1393	ABRE	ACGTG	involved in the abscisic acid responsiveness
TraesCS1B02G274400.1	82	88	MYB	CAACAG/CAACCA/TAACCA	NO
TraesCS1B02G274400.1	562	568	MYB	CAACAG/CAACCA/TAACCA	NO
TraesCS1B02G274400.1	716	722	MYB	CAACAG/CAACCA/TAACCA	NO
TraesCS1B02G274400.1	724	730	MYB	CAACAG/CAACCA/TAACCA	NO
TraesCS1B02G274400.1	1383	1389	DRE core	GCCGAC	NO
TraesCS1B02G274400.1	1115	1121	LTR	CCGAAA	involved in low-temperature responsiveness
TraesCS1B02G274400.1	1093	1102	AAGAA-motif	GAAAGAA	NO
TraesCS1B02G274400.1	1025	1030	TGACG-motif	TGACG	cis-acting regulatory element involved in the MeJA-responsiveness
TraesCS1B02G284000.1	870	876	GT1-motif	GGTTAAT/GGTTAA	light responsive element
TraesCS1B02G284000.1	605	611	MYB	CAACAG/CAACCA/TAACCA	NO
TraesCS1B02G284000.1	846	852	MYB	CAACAG/CAACCA/TAACCA	NO
TraesCS1B02G284000.1	869	875	MYB	CAACAG/CAACCA/TAACCA	NO
TraesCS1B02G284000.1	1080	1086	MYB	CAACAG/CAACCA/TAACCA	NO
TraesCS1B02G284000.1	698	704	ABRE	ACGTG	involved in the abscisic acid responsiveness
TraesCS1B02G284000.1	699	704	ABRE	ACGTG	involved in the abscisic acid responsiveness
TraesCS1B02G284000.1	1145	1150	ABRE	ACGTG	involved in the abscisic acid responsiveness
TraesCS1B02G284000.1	1326	1333	TATC-box	TATCCCA	cis-acting element involved in gibberellin-responsiveness
TraesCS1B02G284000.1	80	85	STRE	AGGGG	NO
TraesCS1B02G284000.1	126	131	STRE	AGGGG	NO
TraesCS1B02G284000.1	237	242	STRE	AGGGG	NO
TraesCS1B02G284000.1	312	317	STRE	AGGGG	NO
TraesCS1B02G284000.1	359	364	STRE	AGGGG	NO
TraesCS1B02G284000.1	629	634	STRE	AGGGG	NO
TraesCS1B02G284000.1	275	281	MBS	CAACTG	MYB binding site involved in drought-inducibility
TraesCS1B02G284000.1	5	10	TGACG-motif	TGACG	cis-acting regulatory element involved in the MeJA-responsiveness
TraesCS1B02G284000.1	434	439	TGACG-motif	TGACG	cis-acting regulatory element involved in the MeJA-responsiveness
TraesCS1B02G284000.1	667	676	AAGAA-motif	GAAAGAA	NO
TraesCS1B02G284000.1	1378	1384	DRE core	GCCGAC	NO
TraesCS1B02G284000.1	698	704	G-box	CACGTC	involved in light responsiveness
TraesCS1B02G284000.1	1255	1261	G-box	CACGTC	involved in light responsiveness
TraesCS1B02G284000.1	1387	1393	AT~TATA-box	TATATA	NO
TraesCS1B02G284000.1	698	704	G-Box	CACGTC	involved in light responsiveness
TraesCS1B02G284000.1	1145	1151	G-Box	CACGTC	involved in light responsiveness
TraesCS1B02G284000.1	841	848	P-box	CCTTTTG	gibberellin-responsive element
TraesCS1B02G284000.1	1192	1202	GATA-motif	AAGGATAAGG	part of a light responsive element
TraesCS1B02G284000.1	1234	1244	GATA-motif	AAGGATAAGG	part of a light responsive element
TraesCS1B02G284000.1	99	105	W box	TTGACC	NO
TraesCS1B02G284000.1	852	858	MYC	CATGTG	NO
TraesCS1B02G284000.1	1005	1011	MYC	CATGTG	NO
TraesCS1B02G284000.1	1063	1069	MYC	CATGTG	NO
TraesCS1B02G284000.1	1250	1256	MYC	CATGTG	NO
TraesCS1B02G284000.1	128	134	Sp1	GGGCGG	light responsive element
TraesCS1B02G284000.1	205	211	Sp1	GGGCGG	light responsive element
TraesCS1B02G284000.1	217	223	Sp1	GGGCGG	light responsive element
TraesCS1B02G284000.1	221	227	Sp1	GGGCGG	light responsive element
TraesCS1B02G284000.1	456	462	Sp1	GGGCGG	light responsive element
TraesCS1B02G284000.1	431	442	MBSI	TTTTTACGGTTA	MYB binding site involved in flavonoid biosynthetic genes regulation
TraesCS1B02G284000.1	1324	1328	TATA-box	TATAA/TATA/TACAAAA	core promoter element around -30 of transcription start
TraesCS1B02G284000.1	1387	1393	TATA-box	TATAA/TATA/TACAAAA	core promoter element around -30 of transcription start
TraesCS1B02G284000.1	1388	1394	TATA-box	TATAA/TATA/TACAAAA	core promoter element around -30 of transcription start
TraesCS1B02G284000.1	1389	1393	TATA-box	TATAA/TATA/TACAAAA	core promoter element around -30 of transcription start
TraesCS1B02G284000.1	150	156	GC-motif	CCCCCG	enhancer-like element involved in anoxic specific inducibility
TraesCS1B02G284000.1	453	459	GC-motif	CCCCCG	enhancer-like element involved in anoxic specific inducibility
TraesCS1B02G284000.1	869	875	MYB-like sequence	TAACCA	NO
TraesCS1B02G284000.1	1080	1086	MYB-like sequence	TAACCA	NO
TraesCS1B02G284000.1	275	281	Myb	CAACTG	NO
TraesCS1B02G284000.1	349	357	E2Fb	TTTGCCGC	NO
TraesCS1B02G304900.1	318	324	MYC	CATGTG	NO
TraesCS1B02G304900.1	509	515	Sp1	GGGCGG	light responsive element
TraesCS1B02G304900.1	513	519	Sp1	GGGCGG	light responsive element
TraesCS1B02G304900.1	577	583	Sp1	GGGCGG	light responsive element
TraesCS1B02G304900.1	633	639	Sp1	GGGCGG	light responsive element
TraesCS1B02G304900.1	1260	1266	Sp1	GGGCGG	light responsive element
TraesCS1B02G304900.1	1293	1299	Sp1	GGGCGG	light responsive element
TraesCS1B02G304900.1	118	124	GC-motif	CCCCCG	enhancer-like element involved in anoxic specific inducibility
TraesCS1B02G304900.1	1476	1485	I-box	GTATAAGGCC	part of a light responsive element
TraesCS1B02G304900.1	518	524	G-box	CACGTC	involved in light responsiveness
TraesCS1B02G304900.1	648	654	G-box	CACGTC	involved in light responsiveness
TraesCS1B02G304900.1	1444	1450	Myb-binding site	CAACAG	NO
TraesCS1B02G304900.1	779	785	DRE core	GCCGAC	NO
TraesCS1B02G304900.1	237	242	TGACG-motif	TGACG	cis-acting regulatory element involved in the MeJA-responsiveness
TraesCS1B02G304900.1	647	652	TGACG-motif	TGACG	cis-acting regulatory element involved in the MeJA-responsiveness
TraesCS1B02G304900.1	792	798	MYB	CAACAG/CAACCA/TAACCA	NO
TraesCS1B02G304900.1	1444	1450	MYB	CAACAG/CAACCA/TAACCA	NO
TraesCS1B02G304900.1	649	654	ABRE	ACGTG	involved in the abscisic acid responsiveness
TraesCS1B02G304900.1	101	106	STRE	AGGGG	NO
TraesCS1B02G304900.1	134	139	STRE	AGGGG	NO
TraesCS1B02G304900.1	612	617	STRE	AGGGG	NO
TraesCS1B02G304900.1	631	636	STRE	AGGGG	NO
TraesCS1B02G304900.1	742	747	STRE	AGGGG	NO
TraesCS1B02G304900.1	764	769	STRE	AGGGG	NO
TraesCS1B02G304900.1	1406	1411	STRE	AGGGG	NO
TraesCS1D02G010300.1	41	46	STRE	AGGGG	NO
TraesCS1D02G010300.1	1143	1148	STRE	AGGGG	NO
TraesCS1D02G010300.1	1192	1197	STRE	AGGGG	NO
TraesCS1D02G010300.1	1397	1402	STRE	AGGGG	NO
TraesCS1D02G010300.1	486	492	WRE3	CCACCT	NO
TraesCS1D02G010300.1	778	784	WRE3	CCACCT	NO
TraesCS1D02G010300.1	301	306	ABRE	ACGTG	involved in the abscisic acid responsiveness
TraesCS1D02G010300.1	341	346	ABRE	ACGTG	involved in the abscisic acid responsiveness
TraesCS1D02G010300.1	659	664	ABRE	ACGTG	involved in the abscisic acid responsiveness
TraesCS1D02G010300.1	1389	1394	ABRE	ACGTG	involved in the abscisic acid responsiveness
TraesCS1D02G010300.1	82	88	MYB	CAACAG/CAACCA/TAACCA	NO
TraesCS1D02G010300.1	266	272	MYB recognition site	CCGTTG	NO
TraesCS1D02G010300.1	620	626	MYB recognition site	CCGTTG	NO
TraesCS1D02G010300.1	1470	1476	MYB recognition site	CCGTTG	NO
TraesCS1D02G010300.1	311	316	TGACG-motif	TGACG	cis-acting regulatory element involved in the MeJA-responsiveness
TraesCS1D02G010300.1	634	639	TGACG-motif	TGACG	cis-acting regulatory element involved in the MeJA-responsiveness
TraesCS1D02G010300.1	739	744	TGACG-motif	TGACG	cis-acting regulatory element involved in the MeJA-responsiveness
TraesCS1D02G010300.1	785	790	TGACG-motif	TGACG	cis-acting regulatory element involved in the MeJA-responsiveness
TraesCS1D02G010300.1	1324	1329	TGACG-motif	TGACG	cis-acting regulatory element involved in the MeJA-responsiveness
TraesCS1D02G010300.1	31	37	MBS	CAACTG	MYB binding site involved in drought-inducibility
TraesCS1D02G010300.1	183	189	MBS	CAACTG	MYB binding site involved in drought-inducibility
TraesCS1D02G010300.1	353	359	DRE core	GCCGAC	NO
TraesCS1D02G010300.1	400	406	DRE core	GCCGAC	NO
TraesCS1D02G010300.1	430	436	DRE core	GCCGAC	NO
TraesCS1D02G010300.1	684	690	DRE core	GCCGAC	NO
TraesCS1D02G010300.1	773	779	DRE core	GCCGAC	NO
TraesCS1D02G010300.1	1094	1100	DRE core	GCCGAC	NO
TraesCS1D02G010300.1	341	347	ABRE3a	TACGTG	NO
TraesCS1D02G010300.1	301	307	G-box	CACGTC	involved in light responsiveness
TraesCS1D02G010300.1	341	347	G-box	CACGTC	involved in light responsiveness
TraesCS1D02G010300.1	658	664	G-box	CACGTC	involved in light responsiveness
TraesCS1D02G010300.1	1389	1395	G-box	CACGTC	involved in light responsiveness
TraesCS1D02G010300.1	523	529	TGA-element	AACGAC	auxin-responsive element
TraesCS1D02G010300.1	543	549	TGA-element	AACGAC	auxin-responsive element
TraesCS1D02G010300.1	655	661	TGA-element	AACGAC	auxin-responsive element
TraesCS1D02G010300.1	889	895	TGA-element	AACGAC	auxin-responsive element
TraesCS1D02G010300.1	59	68	I-box	GTATAAGGCC	part of a light responsive element
TraesCS1D02G010300.1	96	102	TATA-box	TATAA/TATA/TACAAAA	core promoter element around -30 of transcription start
TraesCS1D02G010300.1	97	101	TATA-box	TATAA/TATA/TACAAAA	core promoter element around -30 of transcription start
TraesCS1D02G010300.1	210	214	TATA-box	TATAA/TATA/TACAAAA	core promoter element around -30 of transcription start
TraesCS1D02G010300.1	1242	1246	TATA-box	TATAA/TATA/TACAAAA	core promoter element around -30 of transcription start
TraesCS1D02G010300.1	1080	1086	GC-motif	CCCCCG	enhancer-like element involved in anoxic specific inducibility
TraesCS1D02G010300.1	1099	1105	GC-motif	CCCCCG	enhancer-like element involved in anoxic specific inducibility
TraesCS1D02G010300.1	897	903	Sp1	GGGCGG	light responsive element
TraesCS1D02G010300.1	1176	1182	Sp1	GGGCGG	light responsive element
TraesCS1D02G010300.1	630	636	MYC	CATGTG	NO
TraesCS1D02G010300.1	617	623	W box	TTGACC	NO
TraesCS1D02G010300.1	341	347	ABRE4	CACGTA	NO
TraesCS1D02G010300.1	1132	1140	E2Fb	TTTGCCGC	NO
TraesCS1D02G010300.1	1352	1358	ARE	AAACCA	cis-acting regulatory element essential for the anaerobic induction
TraesCS1D02G010300.1	31	37	Myb	CAACTG	NO
TraesCS1D02G010300.1	183	189	Myb	CAACTG	NO
TraesCS1D02G099500.1	101	107	ARE	AAACCA	cis-acting regulatory element essential for the anaerobic induction
TraesCS1D02G099500.1	108	114	ARE	AAACCA	cis-acting regulatory element essential for the anaerobic induction
TraesCS1D02G099500.1	285	291	ARE	AAACCA	cis-acting regulatory element essential for the anaerobic induction
TraesCS1D02G099500.1	514	520	Myb	CAACTG	NO
TraesCS1D02G099500.1	1032	1038	Myb	CAACTG	NO
TraesCS1D02G099500.1	590	596	W box	TTGACC	NO
TraesCS1D02G099500.1	1224	1230	W box	TTGACC	NO
TraesCS1D02G099500.1	1228	1234	Sp1	GGGCGG	light responsive element
TraesCS1D02G099500.1	168	174	MYC	CATGTG	NO
TraesCS1D02G099500.1	701	707	MYC	CATGTG	NO
TraesCS1D02G099500.1	74	80	GC-motif	CCCCCG	enhancer-like element involved in anoxic specific inducibility
TraesCS1D02G099500.1	595	601	GC-motif	CCCCCG	enhancer-like element involved in anoxic specific inducibility
TraesCS1D02G099500.1	1206	1212	GC-motif	CCCCCG	enhancer-like element involved in anoxic specific inducibility
TraesCS1D02G099500.1	1	8	TATA-box	TATAA/TATA/TACAAAA	core promoter element around -30 of transcription start
TraesCS1D02G099500.1	325	329	TATA-box	TATAA/TATA/TACAAAA	core promoter element around -30 of transcription start
TraesCS1D02G099500.1	453	462	TATA-box	TATAA/TATA/TACAAAA	core promoter element around -30 of transcription start
TraesCS1D02G099500.1	510	516	TATA-box	TATAA/TATA/TACAAAA	core promoter element around -30 of transcription start
TraesCS1D02G099500.1	511	516	TATA-box	TATAA/TATA/TACAAAA	core promoter element around -30 of transcription start
TraesCS1D02G099500.1	512	516	TATA-box	TATAA/TATA/TACAAAA	core promoter element around -30 of transcription start
TraesCS1D02G099500.1	751	755	TATA-box	TATAA/TATA/TACAAAA	core promoter element around -30 of transcription start
TraesCS1D02G099500.1	1011	1020	TC-rich repeats	ATTCTCTAAC	cis-acting element involved in defense and stress responsiveness
TraesCS1D02G099500.1	1039	1048	TC-rich repeats	ATTCTCTAAC	cis-acting element involved in defense and stress responsiveness
TraesCS1D02G099500.1	372	379	GARE-motif	TCTGTTG	gibberellin-responsive element
TraesCS1D02G099500.1	372	378	Myb-binding site	CAACAG	NO
TraesCS1D02G099500.1	365	371	G-box	CACGTC	involved in light responsiveness
TraesCS1D02G099500.1	501	507	G-box	CACGTC	involved in light responsiveness
TraesCS1D02G099500.1	1424	1430	G-box	CACGTC	involved in light responsiveness
TraesCS1D02G099500.1	365	371	G-Box	CACGTC	involved in light responsiveness
TraesCS1D02G099500.1	1146	1152	G-Box	CACGTC	involved in light responsiveness
TraesCS1D02G099500.1	1287	1295	WUN-motif	AAATTTCCT	wound-responsive element
TraesCS1D02G099500.1	1162	1170	ERE	ATTTTAAA	NO
TraesCS1D02G099500.1	41	47	LTR	CCGAAA	involved in low-temperature responsiveness
TraesCS1D02G099500.1	668	674	LTR	CCGAAA	involved in low-temperature responsiveness
TraesCS1D02G099500.1	491	497	DRE core	GCCGAC	NO
TraesCS1D02G099500.1	380	385	TGACG-motif	TGACG	cis-acting regulatory element involved in the MeJA-responsiveness
TraesCS1D02G099500.1	392	397	TGACG-motif	TGACG	cis-acting regulatory element involved in the MeJA-responsiveness
TraesCS1D02G099500.1	1429	1434	TGACG-motif	TGACG	cis-acting regulatory element involved in the MeJA-responsiveness
TraesCS1D02G099500.1	365	371	ABRE	ACGTG	involved in the abscisic acid responsiveness
TraesCS1D02G099500.1	366	371	ABRE	ACGTG	involved in the abscisic acid responsiveness
TraesCS1D02G099500.1	1147	1152	ABRE	ACGTG	involved in the abscisic acid responsiveness
TraesCS1D02G099500.1	1424	1429	ABRE	ACGTG	involved in the abscisic acid responsiveness
TraesCS1D02G099500.1	1108	1114	MYB recognition site	CCGTTG	NO
TraesCS1D02G099500.1	372	378	MYB	CAACAG/CAACCA/TAACCA	NO
TraesCS1D02G099500.1	587	593	MYB	CAACAG/CAACCA/TAACCA	NO
TraesCS1D02G099500.1	1221	1227	MYB	CAACAG/CAACCA/TAACCA	NO
TraesCS1D02G099500.1	557	562	STRE	AGGGG	NO
TraesCS1D02G099500.1	1217	1222	STRE	AGGGG	NO
TraesCS1D02G099500.1	1296	1301	STRE	AGGGG	NO
TraesCS1D02G099500.1	1485	1490	STRE	AGGGG	NO
TraesCS1D02G099500.1	552	558	GT1-motif	GGTTAAT/GGTTAA	light responsive element
TraesCS1D02G099500.1	275	282	MRE	AACCTAA	MYB binding site involved in light responsiveness
TraesCS1D02G114200.1	621	629	GA-motif	ATAGATAA	part of a light responsive element
TraesCS1D02G114200.1	262	268	TGA-element	AACGAC	auxin-responsive element
TraesCS1D02G114200.1	89	95	G-box	CACGTC	involved in light responsiveness
TraesCS1D02G114200.1	970	978	TATA	TATAAAAT	NO
TraesCS1D02G114200.1	977	985	TATA	TATAAAAT	NO
TraesCS1D02G114200.1	658	664	Myb-binding site	CAACAG	NO
TraesCS1D02G114200.1	1162	1168	Myb-binding site	CAACAG	NO
TraesCS1D02G114200.1	1320	1326	Myb-binding site	CAACAG	NO
TraesCS1D02G114200.1	1161	1168	GARE-motif	TCTGTTG	gibberellin-responsive element
TraesCS1D02G114200.1	1319	1326	GARE-motif	TCTGTTG	gibberellin-responsive element
TraesCS1D02G114200.1	327	331	TATA-box	TATAA/TATA/TACAAAA	core promoter element around -30 of transcription start
TraesCS1D02G114200.1	745	750	TATA-box	TATAA/TATA/TACAAAA	core promoter element around -30 of transcription start
TraesCS1D02G114200.1	746	750	TATA-box	TATAA/TATA/TACAAAA	core promoter element around -30 of transcription start
TraesCS1D02G114200.1	802	806	TATA-box	TATAA/TATA/TACAAAA	core promoter element around -30 of transcription start
TraesCS1D02G114200.1	967	974	TATA-box	TATAA/TATA/TACAAAA	core promoter element around -30 of transcription start
TraesCS1D02G114200.1	968	974	TATA-box	TATAA/TATA/TACAAAA	core promoter element around -30 of transcription start
TraesCS1D02G114200.1	969	974	TATA-box	TATAA/TATA/TACAAAA	core promoter element around -30 of transcription start
TraesCS1D02G114200.1	970	974	TATA-box	TATAA/TATA/TACAAAA	core promoter element around -30 of transcription start
TraesCS1D02G114200.1	976	982	TATA-box	TATAA/TATA/TACAAAA	core promoter element around -30 of transcription start
TraesCS1D02G114200.1	977	981	TATA-box	TATAA/TATA/TACAAAA	core promoter element around -30 of transcription start
TraesCS1D02G114200.1	825	831	MYB-like sequence	TAACCA	NO
TraesCS1D02G114200.1	845	851	W box	TTGACC	NO
TraesCS1D02G114200.1	1119	1125	W box	TTGACC	NO
TraesCS1D02G114200.1	1493	1499	Sp1	GGGCGG	light responsive element
TraesCS1D02G114200.1	343	349	MYC	CATGTG	NO
TraesCS1D02G114200.1	1116	1122	MYC	CATGTG	NO
TraesCS1D02G114200.1	903	909	Myb	CAACTG	NO
TraesCS1D02G114200.1	1056	1062	Myb	CAACTG	NO
TraesCS1D02G114200.1	1132	1139	TATC-box	TATCCCA	cis-acting element involved in gibberellin-responsiveness
TraesCS1D02G114200.1	238	243	STRE	AGGGG	NO
TraesCS1D02G114200.1	465	470	STRE	AGGGG	NO
TraesCS1D02G114200.1	1009	1014	STRE	AGGGG	NO
TraesCS1D02G114200.1	1234	1239	STRE	AGGGG	NO
TraesCS1D02G114200.1	1365	1370	STRE	AGGGG	NO
TraesCS1D02G114200.1	1386	1391	STRE	AGGGG	NO
TraesCS1D02G114200.1	1395	1400	STRE	AGGGG	NO
TraesCS1D02G114200.1	1425	1430	STRE	AGGGG	NO
TraesCS1D02G114200.1	385	391	MYB recognition site	CCGTTG	NO
TraesCS1D02G114200.1	658	664	MYB	CAACAG/CAACCA/TAACCA	NO
TraesCS1D02G114200.1	825	831	MYB	CAACAG/CAACCA/TAACCA	NO
TraesCS1D02G114200.1	907	913	MYB	CAACAG/CAACCA/TAACCA	NO
TraesCS1D02G114200.1	1162	1168	MYB	CAACAG/CAACCA/TAACCA	NO
TraesCS1D02G114200.1	1320	1326	MYB	CAACAG/CAACCA/TAACCA	NO
TraesCS1D02G114200.1	1175	1180	TGACG-motif	TGACG	cis-acting regulatory element involved in the MeJA-responsiveness
TraesCS1D02G114200.1	903	909	MBS	CAACTG	MYB binding site involved in drought-inducibility
TraesCS1D02G114200.1	1056	1062	MBS	CAACTG	MYB binding site involved in drought-inducibility
TraesCS1D02G114200.1	1179	1185	DRE core	GCCGAC	NO
TraesCS1D02G133300.1	364	370	ARE	AAACCA	cis-acting regulatory element essential for the anaerobic induction
TraesCS1D02G133300.1	664	671	TCCC-motif	TCTCCCT	part of a light responsive element
TraesCS1D02G133300.1	1095	1101	MYB-like sequence	TAACCA	NO
TraesCS1D02G133300.1	281	287	TATA-box	TATAA/TATA/TACAAAA	core promoter element around -30 of transcription start
TraesCS1D02G133300.1	282	288	TATA-box	TATAA/TATA/TACAAAA	core promoter element around -30 of transcription start
TraesCS1D02G133300.1	283	287	TATA-box	TATAA/TATA/TACAAAA	core promoter element around -30 of transcription start
TraesCS1D02G133300.1	471	476	TATA-box	TATAA/TATA/TACAAAA	core promoter element around -30 of transcription start
TraesCS1D02G133300.1	472	476	TATA-box	TATAA/TATA/TACAAAA	core promoter element around -30 of transcription start
TraesCS1D02G133300.1	760	764	TATA-box	TATAA/TATA/TACAAAA	core promoter element around -30 of transcription start
TraesCS1D02G133300.1	942	948	TATA-box	TATAA/TATA/TACAAAA	core promoter element around -30 of transcription start
TraesCS1D02G133300.1	943	947	TATA-box	TATAA/TATA/TACAAAA	core promoter element around -30 of transcription start
TraesCS1D02G133300.1	1002	1006	TATA-box	TATAA/TATA/TACAAAA	core promoter element around -30 of transcription start
TraesCS1D02G133300.1	1130	1140	TATA-box	TATAA/TATA/TACAAAA	core promoter element around -30 of transcription start
TraesCS1D02G133300.1	1131	1138	TATA-box	TATAA/TATA/TACAAAA	core promoter element around -30 of transcription start
TraesCS1D02G133300.1	1132	1138	TATA-box	TATAA/TATA/TACAAAA	core promoter element around -30 of transcription start
TraesCS1D02G133300.1	1133	1138	TATA-box	TATAA/TATA/TACAAAA	core promoter element around -30 of transcription start
TraesCS1D02G133300.1	1134	1138	TATA-box	TATAA/TATA/TACAAAA	core promoter element around -30 of transcription start
TraesCS1D02G133300.1	294	300	MYC	CATGTG	NO
TraesCS1D02G133300.1	422	428	MYC	CATGTG	NO
TraesCS1D02G133300.1	709	715	MYC	CATGTG	NO
TraesCS1D02G133300.1	891	897	MYC	CATGTG	NO
TraesCS1D02G133300.1	1014	1021	GATA-motif	AAGGATAAGG	part of a light responsive element
TraesCS1D02G133300.1	512	524	P-box	CCTTTTG	gibberellin-responsive element
TraesCS1D02G133300.1	1139	1148	WUN-motif	AAATTTCCT	wound-responsive element
TraesCS1D02G133300.1	455	461	G-Box	CACGTC	involved in light responsiveness
TraesCS1D02G133300.1	811	817	G-Box	CACGTC	involved in light responsiveness
TraesCS1D02G133300.1	281	287	AT~TATA-box	TATATA	NO
TraesCS1D02G133300.1	1002	1010	TATA	TATAAAAT	NO
TraesCS1D02G133300.1	1466	1472	DRE core	GCCGAC	NO
TraesCS1D02G133300.1	45	50	STRE	AGGGG	NO
TraesCS1D02G133300.1	110	115	STRE	AGGGG	NO
TraesCS1D02G133300.1	140	145	STRE	AGGGG	NO
TraesCS1D02G133300.1	254	259	STRE	AGGGG	NO
TraesCS1D02G133300.1	513	518	STRE	AGGGG	NO
TraesCS1D02G133300.1	528	533	STRE	AGGGG	NO
TraesCS1D02G133300.1	538	543	STRE	AGGGG	NO
TraesCS1D02G133300.1	1013	1018	STRE	AGGGG	NO
TraesCS1D02G133300.1	1347	1352	STRE	AGGGG	NO
TraesCS1D02G133300.1	1435	1440	STRE	AGGGG	NO
TraesCS1D02G133300.1	455	460	ABRE	ACGTG	involved in the abscisic acid responsiveness
TraesCS1D02G133300.1	811	816	ABRE	ACGTG	involved in the abscisic acid responsiveness
TraesCS1D02G133300.1	245	251	MYB recognition site	CCGTTG	NO
TraesCS1D02G133300.1	1020	1026	MYB recognition site	CCGTTG	NO
TraesCS1D02G133300.1	1067	1073	MYB recognition site	CCGTTG	NO
TraesCS1D02G133300.1	561	567	MYB	CAACAG/CAACCA/TAACCA	NO
TraesCS1D02G133300.1	1095	1101	MYB	CAACAG/CAACCA/TAACCA	NO
TraesCS1D02G133300.1	825	831	TCT-motif	TCTTAC	part of a light responsive element
TraesCS1D02G133300.1	982	988	TCT-motif	TCTTAC	part of a light responsive element
TraesCS1D02G201500.1	108	113	TGACG-motif	TGACG	cis-acting regulatory element involved in the MeJA-responsiveness
TraesCS1D02G201500.1	248	253	TGACG-motif	TGACG	cis-acting regulatory element involved in the MeJA-responsiveness
TraesCS1D02G201500.1	1113	1119	LTR	CCGAAA	involved in low-temperature responsiveness
TraesCS1D02G201500.1	195	201	TCT-motif	TCTTAC	part of a light responsive element
TraesCS1D02G201500.1	9	14	STRE	AGGGG	NO
TraesCS1D02G201500.1	225	230	STRE	AGGGG	NO
TraesCS1D02G201500.1	432	437	STRE	AGGGG	NO
TraesCS1D02G201500.1	1418	1423	STRE	AGGGG	NO
TraesCS1D02G201500.1	323	329	MYB	CAACAG/CAACCA/TAACCA	NO
TraesCS1D02G201500.1	538	544	WRE3	CCACCT	NO
TraesCS1D02G201500.1	817	823	WRE3	CCACCT	NO
TraesCS1D02G201500.1	25	30	ABRE	ACGTG	involved in the abscisic acid responsiveness
TraesCS1D02G201500.1	370	375	ABRE	ACGTG	involved in the abscisic acid responsiveness
TraesCS1D02G201500.1	515	520	ABRE	ACGTG	involved in the abscisic acid responsiveness
TraesCS1D02G201500.1	564	569	ABRE	ACGTG	involved in the abscisic acid responsiveness
TraesCS1D02G201500.1	1378	1383	ABRE	ACGTG	involved in the abscisic acid responsiveness
TraesCS1D02G201500.1	33	39	TATA-box	TATAA/TATA/TACAAAA	core promoter element around -30 of transcription start
TraesCS1D02G201500.1	34	39	TATA-box	TATAA/TATA/TACAAAA	core promoter element around -30 of transcription start
TraesCS1D02G201500.1	35	39	TATA-box	TATAA/TATA/TACAAAA	core promoter element around -30 of transcription start
TraesCS1D02G201500.1	229	233	TATA-box	TATAA/TATA/TACAAAA	core promoter element around -30 of transcription start
TraesCS1D02G201500.1	365	369	TATA-box	TATAA/TATA/TACAAAA	core promoter element around -30 of transcription start
TraesCS1D02G201500.1	968	973	TATA-box	TATAA/TATA/TACAAAA	core promoter element around -30 of transcription start
TraesCS1D02G201500.1	969	973	TATA-box	TATAA/TATA/TACAAAA	core promoter element around -30 of transcription start
TraesCS1D02G201500.1	1023	1028	TATA-box	TATAA/TATA/TACAAAA	core promoter element around -30 of transcription start
TraesCS1D02G201500.1	1024	1028	TATA-box	TATAA/TATA/TACAAAA	core promoter element around -30 of transcription start
TraesCS1D02G201500.1	703	709	W box	TTGACC	NO
TraesCS1D02G201500.1	975	981	W box	TTGACC	NO
TraesCS1D02G201500.1	318	324	Sp1	GGGCGG	light responsive element
TraesCS1D02G201500.1	463	469	Sp1	GGGCGG	light responsive element
TraesCS1D02G201500.1	1338	1344	Sp1	GGGCGG	light responsive element
TraesCS1D02G201500.1	217	223	MYC	CATGTG	NO
TraesCS1D02G201500.1	356	362	MYC	CATGTG	NO
TraesCS1D02G201500.1	598	604	MYC	CATGTG	NO
TraesCS1D02G201500.1	735	741	MYC	CATGTG	NO
TraesCS1D02G201500.1	843	849	MYC	CATGTG	NO
TraesCS1D02G201500.1	24	30	ABRE4	CACGTA	NO
TraesCS1D02G201500.1	1377	1383	ABRE4	CACGTA	NO
TraesCS1D02G201500.1	929	935	ARE	AAACCA	cis-acting regulatory element essential for the anaerobic induction
TraesCS1D02G201500.1	1044	1050	ARE	AAACCA	cis-acting regulatory element essential for the anaerobic induction
TraesCS1D02G201500.1	370	376	G-Box	CACGTC	involved in light responsiveness
TraesCS1D02G201500.1	515	521	G-Box	CACGTC	involved in light responsiveness
TraesCS1D02G201500.1	563	569	G-Box	CACGTC	involved in light responsiveness
TraesCS1D02G201500.1	24	30	G-box	CACGTC	involved in light responsiveness
TraesCS1D02G201500.1	1153	1159	G-box	CACGTC	involved in light responsiveness
TraesCS1D02G201500.1	1377	1383	G-box	CACGTC	involved in light responsiveness
TraesCS1D02G201500.1	551	557	TGA-element	AACGAC	auxin-responsive element
TraesCS1D02G201500.1	617	623	TGA-element	AACGAC	auxin-responsive element
TraesCS1D02G201500.1	24	30	ABRE3a	TACGTG	NO
TraesCS1D02G201500.1	1377	1383	ABRE3a	TACGTG	NO
TraesCS1D02G201500.1	686	696	GTGGC-motif	GATTCTGTGGC	part of a light responsive element
TraesCS1D02G263900.1	15	21	TCT-motif	TCTTAC	part of a light responsive element
TraesCS1D02G263900.1	709	715	MYB	CAACAG/CAACCA/TAACCA	NO
TraesCS1D02G263900.1	1221	1226	ABRE	ACGTG	involved in the abscisic acid responsiveness
TraesCS1D02G263900.1	1388	1393	ABRE	ACGTG	involved in the abscisic acid responsiveness
TraesCS1D02G263900.1	91	97	WRE3	CCACCT	NO
TraesCS1D02G263900.1	690	697	TATC-box	TATCCCA	cis-acting element involved in gibberellin-responsiveness
TraesCS1D02G263900.1	35	40	STRE	AGGGG	NO
TraesCS1D02G263900.1	111	116	STRE	AGGGG	NO
TraesCS1D02G263900.1	500	505	STRE	AGGGG	NO
TraesCS1D02G263900.1	1166	1171	TGACG-motif	TGACG	cis-acting regulatory element involved in the MeJA-responsiveness
TraesCS1D02G263900.1	1233	1242	AAGAA-motif	GAAAGAA	NO
TraesCS1D02G263900.1	185	191	G-box	CACGTC	involved in light responsiveness
TraesCS1D02G263900.1	1221	1227	G-box	CACGTC	involved in light responsiveness
TraesCS1D02G263900.1	1388	1394	G-box	CACGTC	involved in light responsiveness
TraesCS1D02G263900.1	1221	1227	ABRE3a	TACGTG	NO
TraesCS1D02G263900.1	919	925	AT~TATA-box	TATATA	NO
TraesCS1D02G263900.1	1255	1261	AT~TATA-box	TATATA	NO
TraesCS1D02G263900.1	325	332	AuxRR-core	GGTCCAT	involved in auxin responsiveness
TraesCS1D02G263900.1	1370	1377	AuxRR-core	GGTCCAT	involved in auxin responsiveness
TraesCS1D02G263900.1	36	43	GATA-motif	AAGGATAAGG	part of a light responsive element
TraesCS1D02G263900.1	1406	1412	W box	TTGACC	NO
TraesCS1D02G263900.1	170	176	MYC	CATGTG	NO
TraesCS1D02G263900.1	164	170	TATA-box	TATAA/TATA/TACAAAA	core promoter element around -30 of transcription start
TraesCS1D02G263900.1	165	169	TATA-box	TATAA/TATA/TACAAAA	core promoter element around -30 of transcription start
TraesCS1D02G263900.1	196	201	TATA-box	TATAA/TATA/TACAAAA	core promoter element around -30 of transcription start
TraesCS1D02G263900.1	197	201	TATA-box	TATAA/TATA/TACAAAA	core promoter element around -30 of transcription start
TraesCS1D02G263900.1	270	274	TATA-box	TATAA/TATA/TACAAAA	core promoter element around -30 of transcription start
TraesCS1D02G263900.1	294	300	TATA-box	TATAA/TATA/TACAAAA	core promoter element around -30 of transcription start
TraesCS1D02G263900.1	296	300	TATA-box	TATAA/TATA/TACAAAA	core promoter element around -30 of transcription start
TraesCS1D02G263900.1	402	406	TATA-box	TATAA/TATA/TACAAAA	core promoter element around -30 of transcription start
TraesCS1D02G263900.1	561	565	TATA-box	TATAA/TATA/TACAAAA	core promoter element around -30 of transcription start
TraesCS1D02G263900.1	787	791	TATA-box	TATAA/TATA/TACAAAA	core promoter element around -30 of transcription start
TraesCS1D02G263900.1	808	817	TATA-box	TATAA/TATA/TACAAAA	core promoter element around -30 of transcription start
TraesCS1D02G263900.1	812	816	TATA-box	TATAA/TATA/TACAAAA	core promoter element around -30 of transcription start
TraesCS1D02G263900.1	883	893	TATA-box	TATAA/TATA/TACAAAA	core promoter element around -30 of transcription start
TraesCS1D02G263900.1	885	889	TATA-box	TATAA/TATA/TACAAAA	core promoter element around -30 of transcription start
TraesCS1D02G263900.1	919	925	TATA-box	TATAA/TATA/TACAAAA	core promoter element around -30 of transcription start
TraesCS1D02G263900.1	920	926	TATA-box	TATAA/TATA/TACAAAA	core promoter element around -30 of transcription start
TraesCS1D02G263900.1	921	925	TATA-box	TATAA/TATA/TACAAAA	core promoter element around -30 of transcription start
TraesCS1D02G263900.1	1063	1073	TATA-box	TATAA/TATA/TACAAAA	core promoter element around -30 of transcription start
TraesCS1D02G263900.1	1065	1069	TATA-box	TATAA/TATA/TACAAAA	core promoter element around -30 of transcription start
TraesCS1D02G263900.1	1183	1189	TATA-box	TATAA/TATA/TACAAAA	core promoter element around -30 of transcription start
TraesCS1D02G263900.1	1184	1189	TATA-box	TATAA/TATA/TACAAAA	core promoter element around -30 of transcription start
TraesCS1D02G263900.1	1185	1189	TATA-box	TATAA/TATA/TACAAAA	core promoter element around -30 of transcription start
TraesCS1D02G263900.1	1242	1248	TATA-box	TATAA/TATA/TACAAAA	core promoter element around -30 of transcription start
TraesCS1D02G263900.1	1243	1247	TATA-box	TATAA/TATA/TACAAAA	core promoter element around -30 of transcription start
TraesCS1D02G263900.1	1254	1261	TATA-box	TATAA/TATA/TACAAAA	core promoter element around -30 of transcription start
TraesCS1D02G263900.1	1255	1261	TATA-box	TATAA/TATA/TACAAAA	core promoter element around -30 of transcription start
TraesCS1D02G263900.1	1256	1262	TATA-box	TATAA/TATA/TACAAAA	core promoter element around -30 of transcription start
TraesCS1D02G263900.1	1257	1261	TATA-box	TATAA/TATA/TACAAAA	core promoter element around -30 of transcription start
TraesCS1D02G263900.1	709	715	MYB-like sequence	TAACCA	NO
TraesCS1D02G263900.1	585	591	Myb	CAACTG	NO
TraesCS1D02G263900.1	1221	1227	ABRE4	CACGTA	NO
TraesCS1D02G296100.1	290	297	P-box	CCTTTTG	gibberellin-responsive element
TraesCS1D02G296100.1	431	439	ERE	ATTTTAAA	NO
TraesCS1D02G296100.1	339	345	Myb-binding site	CAACAG	NO
TraesCS1D02G296100.1	42	48	Myb	CAACTG	NO
TraesCS1D02G296100.1	691	697	Myb	CAACTG	NO
TraesCS1D02G296100.1	1375	1381	GC-motif	CCCCCG	enhancer-like element involved in anoxic specific inducibility
TraesCS1D02G296100.1	1384	1390	GC-motif	CCCCCG	enhancer-like element involved in anoxic specific inducibility
TraesCS1D02G296100.1	185	189	TATA-box	TATAA/TATA/TACAAAA	core promoter element around -30 of transcription start
TraesCS1D02G296100.1	161	167	MYC	CATGTG	NO
TraesCS1D02G296100.1	363	369	MYC	CATGTG	NO
TraesCS1D02G296100.1	671	677	MYC	CATGTG	NO
TraesCS1D02G296100.1	1372	1378	Sp1	GGGCGG	light responsive element
TraesCS1D02G296100.1	1381	1387	Sp1	GGGCGG	light responsive element
TraesCS1D02G296100.1	1428	1434	Sp1	GGGCGG	light responsive element
TraesCS1D02G296100.1	1461	1467	Sp1	GGGCGG	light responsive element
TraesCS1D02G296100.1	67	72	STRE	AGGGG	NO
TraesCS1D02G296100.1	221	226	STRE	AGGGG	NO
TraesCS1D02G296100.1	314	319	STRE	AGGGG	NO
TraesCS1D02G296100.1	491	496	STRE	AGGGG	NO
TraesCS1D02G296100.1	1454	1460	WRE3	CCACCT	NO
TraesCS1D02G296100.1	339	345	MYB	CAACAG/CAACCA/TAACCA	NO
TraesCS1D02G296100.1	512	518	MYB	CAACAG/CAACCA/TAACCA	NO
TraesCS1D02G296100.1	583	592	GT1-motif	GGTTAAT/GGTTAA	light responsive element
TraesCS1D02G296100.1	179	184	TGACG-motif	TGACG	cis-acting regulatory element involved in the MeJA-responsiveness
TraesCS1D02G296100.1	495	500	TGACG-motif	TGACG	cis-acting regulatory element involved in the MeJA-responsiveness
TraesCS1D02G296100.1	42	48	MBS	CAACTG	MYB binding site involved in drought-inducibility
TraesCS2A02G145200.1	1453	1459	LTR	CCGAAA	involved in low-temperature responsiveness
TraesCS2A02G145200.1	765	771	DRE core	GCCGAC	NO
TraesCS2A02G145200.1	414	420	MBS	CAACTG	MYB binding site involved in drought-inducibility
TraesCS2A02G145200.1	18	24	WRE3	CCACCT	NO
TraesCS2A02G145200.1	1430	1436	WRE3	CCACCT	NO
TraesCS2A02G145200.1	25	34	ABRE	ACGTG	involved in the abscisic acid responsiveness
TraesCS2A02G145200.1	617	622	STRE	AGGGG	NO
TraesCS2A02G145200.1	911	916	STRE	AGGGG	NO
TraesCS2A02G145200.1	1466	1471	STRE	AGGGG	NO
TraesCS2A02G145200.1	926	932	TCT-motif	TCTTAC	part of a light responsive element
TraesCS2A02G145200.1	145	151	ARE	AAACCA	cis-acting regulatory element essential for the anaerobic induction
TraesCS2A02G145200.1	240	246	ARE	AAACCA	cis-acting regulatory element essential for the anaerobic induction
TraesCS2A02G145200.1	414	420	Myb	CAACTG	NO
TraesCS2A02G145200.1	800	806	MYC	CATGTG	NO
TraesCS2A02G145200.1	860	866	MYC	CATGTG	NO
TraesCS2A02G145200.1	1139	1145	MYC	CATGTG	NO
TraesCS2A02G145200.1	13	19	Sp1	GGGCGG	light responsive element
TraesCS2A02G145200.1	141	145	TATA-box	TATAA/TATA/TACAAAA	core promoter element around -30 of transcription start
TraesCS2A02G145200.1	225	229	TATA-box	TATAA/TATA/TACAAAA	core promoter element around -30 of transcription start
TraesCS2A02G145200.1	248	254	TATA-box	TATAA/TATA/TACAAAA	core promoter element around -30 of transcription start
TraesCS2A02G145200.1	249	253	TATA-box	TATAA/TATA/TACAAAA	core promoter element around -30 of transcription start
TraesCS2A02G145200.1	273	279	TATA-box	TATAA/TATA/TACAAAA	core promoter element around -30 of transcription start
TraesCS2A02G145200.1	274	279	TATA-box	TATAA/TATA/TACAAAA	core promoter element around -30 of transcription start
TraesCS2A02G145200.1	275	279	TATA-box	TATAA/TATA/TACAAAA	core promoter element around -30 of transcription start
TraesCS2A02G145200.1	1010	1014	TATA-box	TATAA/TATA/TACAAAA	core promoter element around -30 of transcription start
TraesCS2A02G145200.1	1095	1104	TATA-box	TATAA/TATA/TACAAAA	core promoter element around -30 of transcription start
TraesCS2A02G145200.1	1096	1102	TATA-box	TATAA/TATA/TACAAAA	core promoter element around -30 of transcription start
TraesCS2A02G145200.1	1097	1101	TATA-box	TATAA/TATA/TACAAAA	core promoter element around -30 of transcription start
TraesCS2A02G145200.1	1133	1139	TATA-box	TATAA/TATA/TACAAAA	core promoter element around -30 of transcription start
TraesCS2A02G145200.1	1135	1139	TATA-box	TATAA/TATA/TACAAAA	core promoter element around -30 of transcription start
TraesCS2A02G145200.1	1155	1159	TATA-box	TATAA/TATA/TACAAAA	core promoter element around -30 of transcription start
TraesCS2A02G145200.1	1229	1233	TATA-box	TATAA/TATA/TACAAAA	core promoter element around -30 of transcription start
TraesCS2A02G145200.1	1345	1349	TATA-box	TATAA/TATA/TACAAAA	core promoter element around -30 of transcription start
TraesCS2A02G145200.1	55	61	GC-motif	CCCCCG	enhancer-like element involved in anoxic specific inducibility
TraesCS2A02G145200.1	597	603	GC-motif	CCCCCG	enhancer-like element involved in anoxic specific inducibility
TraesCS2A02G145200.1	1448	1457	I-box	GTATAAGGCC	part of a light responsive element
TraesCS2A02G145200.1	225	233	TATA	TATAAAAT	NO
TraesCS2A02G145200.1	720	726	G-box	CACGTC	involved in light responsiveness
TraesCS2A02G145200.1	1020	1028	WUN-motif	AAATTTCCT	wound-responsive element
TraesCS2A02G145200.1	215	223	ERE	ATTTTAAA	NO
TraesCS2A02G145200.1	1133	1139	AT~TATA-box	TATATA	NO
TraesCS2A02G178500.1	319	325	G-box	CACGTC	involved in light responsiveness
TraesCS2A02G178500.1	1398	1404	G-box	CACGTC	involved in light responsiveness
TraesCS2A02G178500.1	1462	1468	G-box	CACGTC	involved in light responsiveness
TraesCS2A02G178500.1	1265	1271	TGA-element	AACGAC	auxin-responsive element
TraesCS2A02G178500.1	1398	1404	ABRE3a	TACGTG	NO
TraesCS2A02G178500.1	373	379	AT~TATA-box	TATATA	NO
TraesCS2A02G178500.1	1229	1235	G-Box	CACGTC	involved in light responsiveness
TraesCS2A02G178500.1	1283	1289	G-Box	CACGTC	involved in light responsiveness
TraesCS2A02G178500.1	86	92	GC-motif	CCCCCG	enhancer-like element involved in anoxic specific inducibility
TraesCS2A02G178500.1	513	522	TC-rich repeats	ATTCTCTAAC	cis-acting element involved in defense and stress responsiveness
TraesCS2A02G178500.1	372	378	TATA-box	TATAA/TATA/TACAAAA	core promoter element around -30 of transcription start
TraesCS2A02G178500.1	373	379	TATA-box	TATAA/TATA/TACAAAA	core promoter element around -30 of transcription start
TraesCS2A02G178500.1	375	379	TATA-box	TATAA/TATA/TACAAAA	core promoter element around -30 of transcription start
TraesCS2A02G178500.1	396	402	TATA-box	TATAA/TATA/TACAAAA	core promoter element around -30 of transcription start
TraesCS2A02G178500.1	397	402	TATA-box	TATAA/TATA/TACAAAA	core promoter element around -30 of transcription start
TraesCS2A02G178500.1	398	402	TATA-box	TATAA/TATA/TACAAAA	core promoter element around -30 of transcription start
TraesCS2A02G178500.1	413	419	TATA-box	TATAA/TATA/TACAAAA	core promoter element around -30 of transcription start
TraesCS2A02G178500.1	415	419	TATA-box	TATAA/TATA/TACAAAA	core promoter element around -30 of transcription start
TraesCS2A02G178500.1	528	534	TATA-box	TATAA/TATA/TACAAAA	core promoter element around -30 of transcription start
TraesCS2A02G178500.1	529	534	TATA-box	TATAA/TATA/TACAAAA	core promoter element around -30 of transcription start
TraesCS2A02G178500.1	530	534	TATA-box	TATAA/TATA/TACAAAA	core promoter element around -30 of transcription start
TraesCS2A02G178500.1	610	616	TATA-box	TATAA/TATA/TACAAAA	core promoter element around -30 of transcription start
TraesCS2A02G178500.1	611	616	TATA-box	TATAA/TATA/TACAAAA	core promoter element around -30 of transcription start
TraesCS2A02G178500.1	612	616	TATA-box	TATAA/TATA/TACAAAA	core promoter element around -30 of transcription start
TraesCS2A02G178500.1	733	739	TATA-box	TATAA/TATA/TACAAAA	core promoter element around -30 of transcription start
TraesCS2A02G178500.1	734	739	TATA-box	TATAA/TATA/TACAAAA	core promoter element around -30 of transcription start
TraesCS2A02G178500.1	735	739	TATA-box	TATAA/TATA/TACAAAA	core promoter element around -30 of transcription start
TraesCS2A02G178500.1	779	788	TATA-box	TATAA/TATA/TACAAAA	core promoter element around -30 of transcription start
TraesCS2A02G178500.1	815	821	TATA-box	TATAA/TATA/TACAAAA	core promoter element around -30 of transcription start
TraesCS2A02G178500.1	816	821	TATA-box	TATAA/TATA/TACAAAA	core promoter element around -30 of transcription start
TraesCS2A02G178500.1	817	821	TATA-box	TATAA/TATA/TACAAAA	core promoter element around -30 of transcription start
TraesCS2A02G178500.1	939	945	TATA-box	TATAA/TATA/TACAAAA	core promoter element around -30 of transcription start
TraesCS2A02G178500.1	940	945	TATA-box	TATAA/TATA/TACAAAA	core promoter element around -30 of transcription start
TraesCS2A02G178500.1	941	945	TATA-box	TATAA/TATA/TACAAAA	core promoter element around -30 of transcription start
TraesCS2A02G178500.1	1186	1192	TATA-box	TATAA/TATA/TACAAAA	core promoter element around -30 of transcription start
TraesCS2A02G178500.1	1187	1192	TATA-box	TATAA/TATA/TACAAAA	core promoter element around -30 of transcription start
TraesCS2A02G178500.1	1188	1192	TATA-box	TATAA/TATA/TACAAAA	core promoter element around -30 of transcription start
TraesCS2A02G178500.1	1423	1427	TATA-box	TATAA/TATA/TACAAAA	core promoter element around -30 of transcription start
TraesCS2A02G178500.1	1163	1169	Myb	CAACTG	NO
TraesCS2A02G178500.1	1071	1077	ARE	AAACCA	cis-acting regulatory element essential for the anaerobic induction
TraesCS2A02G178500.1	1398	1404	ABRE4	CACGTA	NO
TraesCS2A02G178500.1	320	325	ABRE	ACGTG	involved in the abscisic acid responsiveness
TraesCS2A02G178500.1	1230	1235	ABRE	ACGTG	involved in the abscisic acid responsiveness
TraesCS2A02G178500.1	1283	1288	ABRE	ACGTG	involved in the abscisic acid responsiveness
TraesCS2A02G178500.1	1399	1404	ABRE	ACGTG	involved in the abscisic acid responsiveness
TraesCS2A02G178500.1	390	396	WRE3	CCACCT	NO
TraesCS2A02G178500.1	1096	1102	WRE3	CCACCT	NO
TraesCS2A02G178500.1	1128	1134	WRE3	CCACCT	NO
TraesCS2A02G178500.1	248	253	STRE	AGGGG	NO
TraesCS2A02G178500.1	314	319	STRE	AGGGG	NO
TraesCS2A02G178500.1	456	461	STRE	AGGGG	NO
TraesCS2A02G178500.1	1055	1060	STRE	AGGGG	NO
TraesCS2A02G178500.1	1377	1382	STRE	AGGGG	NO
TraesCS2A02G178500.1	1163	1169	MBS	CAACTG	MYB binding site involved in drought-inducibility
TraesCS2A02G178500.1	83	88	TGACG-motif	TGACG	cis-acting regulatory element involved in the MeJA-responsiveness
TraesCS2A02G178500.1	978	983	TGACG-motif	TGACG	cis-acting regulatory element involved in the MeJA-responsiveness
TraesCS2A02G178500.1	1030	1035	TGACG-motif	TGACG	cis-acting regulatory element involved in the MeJA-responsiveness
TraesCS2A02G178500.1	1192	1197	TGACG-motif	TGACG	cis-acting regulatory element involved in the MeJA-responsiveness
TraesCS2A02G178500.1	298	304	LTR	CCGAAA	involved in low-temperature responsiveness
TraesCS2A02G232200.1	732	737	ABRE	ACGTG	involved in the abscisic acid responsiveness
TraesCS2A02G232200.1	391	397	WRE3	CCACCT	NO
TraesCS2A02G232200.1	739	745	WRE3	CCACCT	NO
TraesCS2A02G232200.1	137	143	MYB	CAACAG/CAACCA/TAACCA	NO
TraesCS2A02G232200.1	413	419	MYB	CAACAG/CAACCA/TAACCA	NO
TraesCS2A02G232200.1	1011	1017	MYB	CAACAG/CAACCA/TAACCA	NO
TraesCS2A02G232200.1	1156	1162	MYB	CAACAG/CAACCA/TAACCA	NO
TraesCS2A02G232200.1	241	247	MYB recognition site	CCGTTG	NO
TraesCS2A02G232200.1	372	378	MYB recognition site	CCGTTG	NO
TraesCS2A02G232200.1	623	628	STRE	AGGGG	NO
TraesCS2A02G232200.1	669	674	STRE	AGGGG	NO
TraesCS2A02G232200.1	1323	1328	STRE	AGGGG	NO
TraesCS2A02G232200.1	136	142	GT1-motif	GGTTAAT/GGTTAA	light responsive element
TraesCS2A02G232200.1	791	797	LTR	CCGAAA	involved in low-temperature responsiveness
TraesCS2A02G232200.1	1237	1243	LTR	CCGAAA	involved in low-temperature responsiveness
TraesCS2A02G232200.1	931	939	TGA-box	TGACGTAA	part of an auxin-responsive element
TraesCS2A02G232200.1	486	492	DRE core	GCCGAC	NO
TraesCS2A02G232200.1	771	777	DRE core	GCCGAC	NO
TraesCS2A02G232200.1	1139	1145	DRE core	GCCGAC	NO
TraesCS2A02G232200.1	1429	1435	DRE core	GCCGAC	NO
TraesCS2A02G232200.1	50	55	TGACG-motif	TGACG	cis-acting regulatory element involved in the MeJA-responsiveness
TraesCS2A02G232200.1	431	436	TGACG-motif	TGACG	cis-acting regulatory element involved in the MeJA-responsiveness
TraesCS2A02G232200.1	723	728	TGACG-motif	TGACG	cis-acting regulatory element involved in the MeJA-responsiveness
TraesCS2A02G232200.1	730	735	TGACG-motif	TGACG	cis-acting regulatory element involved in the MeJA-responsiveness
TraesCS2A02G232200.1	931	936	TGACG-motif	TGACG	cis-acting regulatory element involved in the MeJA-responsiveness
TraesCS2A02G232200.1	1275	1280	TGACG-motif	TGACG	cis-acting regulatory element involved in the MeJA-responsiveness
TraesCS2A02G232200.1	399	406	AuxRR-core	GGTCCAT	involved in auxin responsiveness
TraesCS2A02G232200.1	952	959	AuxRR-core	GGTCCAT	involved in auxin responsiveness
TraesCS2A02G232200.1	1040	1047	P-box	CCTTTTG	gibberellin-responsive element
TraesCS2A02G232200.1	1011	1017	Myb-binding site	CAACAG	NO
TraesCS2A02G232200.1	654	660	G-box	CACGTC	involved in light responsiveness
TraesCS2A02G232200.1	731	737	G-box	CACGTC	involved in light responsiveness
TraesCS2A02G232200.1	322	329	DRE1	ACCGAGA	NO
TraesCS2A02G232200.1	1327	1334	TCCC-motif	TCTCCCT	part of a light responsive element
TraesCS2A02G232200.1	1144	1150	Sp1	GGGCGG	light responsive element
TraesCS2A02G232200.1	1290	1296	Sp1	GGGCGG	light responsive element
TraesCS2A02G232200.1	104	110	MYC	CATGTG	NO
TraesCS2A02G232200.1	114	120	MYC	CATGTG	NO
TraesCS2A02G232200.1	1054	1060	MYC	CATGTG	NO
TraesCS2A02G232200.1	1132	1138	W box	TTGACC	NO
TraesCS2A02G232200.1	137	143	MYB-like sequence	TAACCA	NO
TraesCS2A02G232200.1	413	419	MYB-like sequence	TAACCA	NO
TraesCS2A02G232200.1	77	86	TC-rich repeats	ATTCTCTAAC	cis-acting element involved in defense and stress responsiveness
TraesCS2A02G232200.1	681	687	GC-motif	CCCCCG	enhancer-like element involved in anoxic specific inducibility
TraesCS2A02G232200.1	887	893	GC-motif	CCCCCG	enhancer-like element involved in anoxic specific inducibility
TraesCS2A02G232200.1	1444	1450	GC-motif	CCCCCG	enhancer-like element involved in anoxic specific inducibility
TraesCS2A02G232200.1	261	267	TATA-box	TATAA/TATA/TACAAAA	core promoter element around -30 of transcription start
TraesCS2A02G232200.1	262	266	TATA-box	TATAA/TATA/TACAAAA	core promoter element around -30 of transcription start
TraesCS2A02G232200.1	500	507	TATA-box	TATAA/TATA/TACAAAA	core promoter element around -30 of transcription start
TraesCS2A02G372600.1	1290	1296	MYB-like sequence	TAACCA	NO
TraesCS2A02G372600.1	6	10	TATA-box	TATAA/TATA/TACAAAA	core promoter element around -30 of transcription start
TraesCS2A02G372600.1	47	52	TATA-box	TATAA/TATA/TACAAAA	core promoter element around -30 of transcription start
TraesCS2A02G372600.1	48	52	TATA-box	TATAA/TATA/TACAAAA	core promoter element around -30 of transcription start
TraesCS2A02G372600.1	104	110	TATA-box	TATAA/TATA/TACAAAA	core promoter element around -30 of transcription start
TraesCS2A02G372600.1	106	110	TATA-box	TATAA/TATA/TACAAAA	core promoter element around -30 of transcription start
TraesCS2A02G372600.1	113	119	TATA-box	TATAA/TATA/TACAAAA	core promoter element around -30 of transcription start
TraesCS2A02G372600.1	114	118	TATA-box	TATAA/TATA/TACAAAA	core promoter element around -30 of transcription start
TraesCS2A02G372600.1	124	130	TATA-box	TATAA/TATA/TACAAAA	core promoter element around -30 of transcription start
TraesCS2A02G372600.1	125	131	TATA-box	TATAA/TATA/TACAAAA	core promoter element around -30 of transcription start
TraesCS2A02G372600.1	126	130	TATA-box	TATAA/TATA/TACAAAA	core promoter element around -30 of transcription start
TraesCS2A02G372600.1	622	628	TATA-box	TATAA/TATA/TACAAAA	core promoter element around -30 of transcription start
TraesCS2A02G372600.1	623	628	TATA-box	TATAA/TATA/TACAAAA	core promoter element around -30 of transcription start
TraesCS2A02G372600.1	624	628	TATA-box	TATAA/TATA/TACAAAA	core promoter element around -30 of transcription start
TraesCS2A02G372600.1	1004	1009	TATA-box	TATAA/TATA/TACAAAA	core promoter element around -30 of transcription start
TraesCS2A02G372600.1	1005	1009	TATA-box	TATAA/TATA/TACAAAA	core promoter element around -30 of transcription start
TraesCS2A02G372600.1	1209	1215	TATA-box	TATAA/TATA/TACAAAA	core promoter element around -30 of transcription start
TraesCS2A02G372600.1	1210	1216	TATA-box	TATAA/TATA/TACAAAA	core promoter element around -30 of transcription start
TraesCS2A02G372600.1	1212	1216	TATA-box	TATAA/TATA/TACAAAA	core promoter element around -30 of transcription start
TraesCS2A02G372600.1	1293	1298	TATA-box	TATAA/TATA/TACAAAA	core promoter element around -30 of transcription start
TraesCS2A02G372600.1	1294	1298	TATA-box	TATAA/TATA/TACAAAA	core promoter element around -30 of transcription start
TraesCS2A02G372600.1	148	154	MYC	CATGTG	NO
TraesCS2A02G372600.1	1286	1292	MYC	CATGTG	NO
TraesCS2A02G372600.1	1381	1387	MYC	CATGTG	NO
TraesCS2A02G372600.1	1191	1198	TCCC-motif	TCTCCCT	part of a light responsive element
TraesCS2A02G372600.1	607	613	ARE	AAACCA	cis-acting regulatory element essential for the anaerobic induction
TraesCS2A02G372600.1	748	754	ARE	AAACCA	cis-acting regulatory element essential for the anaerobic induction
TraesCS2A02G372600.1	433	439	G-Box	CACGTC	involved in light responsiveness
TraesCS2A02G372600.1	1308	1314	G-Box	CACGTC	involved in light responsiveness
TraesCS2A02G372600.1	1320	1328	ERE	ATTTTAAA	NO
TraesCS2A02G372600.1	124	130	AT~TATA-box	TATATA	NO
TraesCS2A02G372600.1	1210	1216	AT~TATA-box	TATATA	NO
TraesCS2A02G372600.1	373	379	Myb-binding site	CAACAG	NO
TraesCS2A02G372600.1	126	134	TATA	TATAAAAT	NO
TraesCS2A02G372600.1	341	347	TGA-element	AACGAC	auxin-responsive element
TraesCS2A02G372600.1	290	297	P-box	CCTTTTG	gibberellin-responsive element
TraesCS2A02G372600.1	921	928	GCN4_motif	TGAGTCA	involved in endosperm expression
TraesCS2A02G372600.1	1256	1263	AAGAA-motif	GAAAGAA	NO
TraesCS2A02G372600.1	812	819	MRE	AACCTAA	MYB binding site involved in light responsiveness
TraesCS2A02G372600.1	166	173	TATC-box	TATCCCA	cis-acting element involved in gibberellin-responsiveness
TraesCS2A02G372600.1	201	206	STRE	AGGGG	NO
TraesCS2A02G372600.1	308	313	STRE	AGGGG	NO
TraesCS2A02G372600.1	1150	1155	STRE	AGGGG	NO
TraesCS2A02G372600.1	1187	1192	STRE	AGGGG	NO
TraesCS2A02G372600.1	369	375	WRE3	CCACCT	NO
TraesCS2A02G372600.1	1491	1497	WRE3	CCACCT	NO
TraesCS2A02G372600.1	434	439	ABRE	ACGTG	involved in the abscisic acid responsiveness
TraesCS2A02G372600.1	1308	1313	ABRE	ACGTG	involved in the abscisic acid responsiveness
TraesCS2A02G372600.1	162	168	MYB	CAACAG/CAACCA/TAACCA	NO
TraesCS2A02G372600.1	373	379	MYB	CAACAG/CAACCA/TAACCA	NO
TraesCS2A02G372600.1	415	421	MYB	CAACAG/CAACCA/TAACCA	NO
TraesCS2A02G372600.1	1290	1296	MYB	CAACAG/CAACCA/TAACCA	NO
TraesCS2A02G479900.1	71	77	MYB	CAACAG/CAACCA/TAACCA	NO
TraesCS2A02G479900.1	88	94	MYB	CAACAG/CAACCA/TAACCA	NO
TraesCS2A02G479900.1	374	380	MYB	CAACAG/CAACCA/TAACCA	NO
TraesCS2A02G479900.1	378	384	MYB recognition site	CCGTTG	NO
TraesCS2A02G479900.1	714	720	MYB recognition site	CCGTTG	NO
TraesCS2A02G479900.1	1276	1282	MYB recognition site	CCGTTG	NO
TraesCS2A02G479900.1	1449	1455	MYB recognition site	CCGTTG	NO
TraesCS2A02G479900.1	175	181	WRE3	CCACCT	NO
TraesCS2A02G479900.1	1317	1323	WRE3	CCACCT	NO
TraesCS2A02G479900.1	352	361	ABRE	ACGTG	involved in the abscisic acid responsiveness
TraesCS2A02G479900.1	401	406	ABRE	ACGTG	involved in the abscisic acid responsiveness
TraesCS2A02G479900.1	556	561	STRE	AGGGG	NO
TraesCS2A02G479900.1	662	667	STRE	AGGGG	NO
TraesCS2A02G479900.1	674	679	STRE	AGGGG	NO
TraesCS2A02G479900.1	727	732	STRE	AGGGG	NO
TraesCS2A02G479900.1	1439	1444	STRE	AGGGG	NO
TraesCS2A02G479900.1	1209	1215	GT1-motif	GGTTAAT/GGTTAA	light responsive element
TraesCS2A02G479900.1	448	454	LTR	CCGAAA	involved in low-temperature responsiveness
TraesCS2A02G479900.1	1041	1047	DRE core	GCCGAC	NO
TraesCS2A02G479900.1	1125	1131	DRE core	GCCGAC	NO
TraesCS2A02G479900.1	367	372	TGACG-motif	TGACG	cis-acting regulatory element involved in the MeJA-responsiveness
TraesCS2A02G479900.1	393	398	TGACG-motif	TGACG	cis-acting regulatory element involved in the MeJA-responsiveness
TraesCS2A02G479900.1	1161	1166	TGACG-motif	TGACG	cis-acting regulatory element involved in the MeJA-responsiveness
TraesCS2A02G479900.1	401	407	G-box	CACGTC	involved in light responsiveness
TraesCS2A02G479900.1	569	575	G-box	CACGTC	involved in light responsiveness
TraesCS2A02G479900.1	877	883	G-box	CACGTC	involved in light responsiveness
TraesCS2A02G479900.1	1109	1117	AT~TATA-box	TATATA	NO
TraesCS2A02G479900.1	1111	1117	AT~TATA-box	TATATA	NO
TraesCS2A02G479900.1	911	917	ARE	AAACCA	cis-acting regulatory element essential for the anaerobic induction
TraesCS2A02G479900.1	1192	1198	ARE	AAACCA	cis-acting regulatory element essential for the anaerobic induction
TraesCS2A02G479900.1	488	496	re2f-1	GCGGGAAA	NO
TraesCS2A02G479900.1	1207	1216	GATA-motif	AAGGATAAGG	part of a light responsive element
TraesCS2A02G479900.1	99	108	HD-Zip 1	CAAT(A/T)ATTG	element involved in differentiation of the palisade mesophyll cells
TraesCS2A02G479900.1	1331	1337	MYC	CATGTG	NO
TraesCS2A02G479900.1	1350	1356	MYC	CATGTG	NO
TraesCS2A02G479900.1	630	636	Sp1	GGGCGG	light responsive element
TraesCS2A02G479900.1	659	665	Sp1	GGGCGG	light responsive element
TraesCS2A02G479900.1	723	729	Sp1	GGGCGG	light responsive element
TraesCS2A02G479900.1	732	738	Sp1	GGGCGG	light responsive element
TraesCS2A02G479900.1	758	764	Sp1	GGGCGG	light responsive element
TraesCS2A02G479900.1	765	771	Sp1	GGGCGG	light responsive element
TraesCS2A02G479900.1	788	794	Sp1	GGGCGG	light responsive element
TraesCS2A02G479900.1	1202	1213	MBSI	TTTTTACGGTTA	MYB binding site involved in flavonoid biosynthetic genes regulation
TraesCS2A02G479900.1	1108	1117	TATA-box	TATAA/TATA/TACAAAA	core promoter element around -30 of transcription start
TraesCS2A02G479900.1	1109	1115	TATA-box	TATAA/TATA/TACAAAA	core promoter element around -30 of transcription start
TraesCS2A02G479900.1	1110	1117	TATA-box	TATAA/TATA/TACAAAA	core promoter element around -30 of transcription start
TraesCS2A02G479900.1	1111	1117	TATA-box	TATAA/TATA/TACAAAA	core promoter element around -30 of transcription start
TraesCS2A02G479900.1	1112	1118	TATA-box	TATAA/TATA/TACAAAA	core promoter element around -30 of transcription start
TraesCS2A02G479900.1	1113	1117	TATA-box	TATAA/TATA/TACAAAA	core promoter element around -30 of transcription start
TraesCS2A02G479900.1	1118	1124	TATA-box	TATAA/TATA/TACAAAA	core promoter element around -30 of transcription start
TraesCS2A02G479900.1	1119	1124	TATA-box	TATAA/TATA/TACAAAA	core promoter element around -30 of transcription start
TraesCS2A02G479900.1	1120	1124	TATA-box	TATAA/TATA/TACAAAA	core promoter element around -30 of transcription start
TraesCS2A02G479900.1	745	751	GC-motif	CCCCCG	enhancer-like element involved in anoxic specific inducibility
TraesCS2A02G479900.1	1012	1018	GC-motif	CCCCCG	enhancer-like element involved in anoxic specific inducibility
TraesCS2A02G526800.1	1168	1174	DRE core	GCCGAC	NO
TraesCS2A02G526800.1	1364	1370	DRE core	GCCGAC	NO
TraesCS2A02G526800.1	1396	1402	DRE core	GCCGAC	NO
TraesCS2A02G526800.1	676	682	LTR	CCGAAA	involved in low-temperature responsiveness
TraesCS2A02G526800.1	792	799	AAGAA-motif	GAAAGAA	NO
TraesCS2A02G526800.1	314	319	TGACG-motif	TGACG	cis-acting regulatory element involved in the MeJA-responsiveness
TraesCS2A02G526800.1	669	674	TGACG-motif	TGACG	cis-acting regulatory element involved in the MeJA-responsiveness
TraesCS2A02G526800.1	1324	1329	TGACG-motif	TGACG	cis-acting regulatory element involved in the MeJA-responsiveness
TraesCS2A02G526800.1	1401	1406	TGACG-motif	TGACG	cis-acting regulatory element involved in the MeJA-responsiveness
TraesCS2A02G526800.1	162	167	STRE	AGGGG	NO
TraesCS2A02G526800.1	432	437	STRE	AGGGG	NO
TraesCS2A02G526800.1	1233	1238	STRE	AGGGG	NO
TraesCS2A02G526800.1	987	993	MYB recognition site	CCGTTG	NO
TraesCS2A02G526800.1	1410	1416	MYB	CAACAG/CAACCA/TAACCA	NO
TraesCS2A02G526800.1	446	451	ABRE	ACGTG	involved in the abscisic acid responsiveness
TraesCS2A02G526800.1	659	664	ABRE	ACGTG	involved in the abscisic acid responsiveness
TraesCS2A02G526800.1	687	692	ABRE	ACGTG	involved in the abscisic acid responsiveness
TraesCS2A02G526800.1	305	313	CARE	CAACTCCC	NO
TraesCS2A02G526800.1	166	172	GT1-motif	GGTTAAT/GGTTAA	light responsive element
TraesCS2A02G526800.1	987	997	NON	CAACGGCCACG	NO
TraesCS2A02G526800.1	446	452	ABRE4	CACGTA	NO
TraesCS2A02G526800.1	585	591	Myb	CAACTG	NO
TraesCS2A02G526800.1	762	768	Myb	CAACTG	NO
TraesCS2A02G526800.1	931	937	Myb	CAACTG	NO
TraesCS2A02G526800.1	581	587	ARE	AAACCA	cis-acting regulatory element essential for the anaerobic induction
TraesCS2A02G526800.1	29	33	TATA-box	TATAA/TATA/TACAAAA	core promoter element around -30 of transcription start
TraesCS2A02G526800.1	275	280	TATA-box	TATAA/TATA/TACAAAA	core promoter element around -30 of transcription start
TraesCS2A02G526800.1	276	280	TATA-box	TATAA/TATA/TACAAAA	core promoter element around -30 of transcription start
TraesCS2A02G526800.1	398	403	TATA-box	TATAA/TATA/TACAAAA	core promoter element around -30 of transcription start
TraesCS2A02G526800.1	399	403	TATA-box	TATAA/TATA/TACAAAA	core promoter element around -30 of transcription start
TraesCS2A02G526800.1	491	499	TATA-box	TATAA/TATA/TACAAAA	core promoter element around -30 of transcription start
TraesCS2A02G526800.1	603	609	TATA-box	TATAA/TATA/TACAAAA	core promoter element around -30 of transcription start
TraesCS2A02G526800.1	604	610	TATA-box	TATAA/TATA/TACAAAA	core promoter element around -30 of transcription start
TraesCS2A02G526800.1	605	611	TATA-box	TATAA/TATA/TACAAAA	core promoter element around -30 of transcription start
TraesCS2A02G526800.1	606	610	TATA-box	TATAA/TATA/TACAAAA	core promoter element around -30 of transcription start
TraesCS2A02G526800.1	638	642	TATA-box	TATAA/TATA/TACAAAA	core promoter element around -30 of transcription start
TraesCS2A02G526800.1	813	819	TATA-box	TATAA/TATA/TACAAAA	core promoter element around -30 of transcription start
TraesCS2A02G526800.1	814	819	TATA-box	TATAA/TATA/TACAAAA	core promoter element around -30 of transcription start
TraesCS2A02G526800.1	815	819	TATA-box	TATAA/TATA/TACAAAA	core promoter element around -30 of transcription start
TraesCS2A02G526800.1	345	351	GC-motif	CCCCCG	enhancer-like element involved in anoxic specific inducibility
TraesCS2A02G526800.1	792	801	TC-rich repeats	ATTCTCTAAC	cis-acting element involved in defense and stress responsiveness
TraesCS2A02G526800.1	1112	1118	W box	TTGACC	NO
TraesCS2A02G526800.1	265	271	MYC	CATGTG	NO
TraesCS2A02G526800.1	604	610	AT~TATA-box	TATATA	NO
TraesCS2A02G526800.1	687	693	G-Box	CACGTC	involved in light responsiveness
TraesCS2A02G526800.1	367	373	TGA-element	AACGAC	auxin-responsive element
TraesCS2A02G526800.1	376	382	TGA-element	AACGAC	auxin-responsive element
TraesCS2A02G526800.1	446	452	G-box	CACGTC	involved in light responsiveness
TraesCS2A02G526800.1	659	665	G-box	CACGTC	involved in light responsiveness
TraesCS2A02G526800.1	446	452	ABRE3a	TACGTG	NO
TraesCS2A02G526800.1	1410	1416	Myb-binding site	CAACAG	NO
TraesCS2A02G545900.1	917	923	Myb	CAACTG	NO
TraesCS2A02G545900.1	968	974	Myb	CAACTG	NO
TraesCS2A02G545900.1	1348	1354	Myb	CAACTG	NO
TraesCS2A02G545900.1	299	308	Gap-box	CAAATGAA(A/G)A	part of a light responsive element
TraesCS2A02G545900.1	299	305	MYC	CATGTG	NO
TraesCS2A02G545900.1	345	351	MYC	CATGTG	NO
TraesCS2A02G545900.1	379	385	MYC	CATGTG	NO
TraesCS2A02G545900.1	386	392	MYC	CATGTG	NO
TraesCS2A02G545900.1	484	490	MYC	CATGTG	NO
TraesCS2A02G545900.1	497	503	MYC	CATGTG	NO
TraesCS2A02G545900.1	546	552	MYC	CATGTG	NO
TraesCS2A02G545900.1	846	852	Sp1	GGGCGG	light responsive element
TraesCS2A02G545900.1	801	808	GATA-motif	AAGGATAAGG	part of a light responsive element
TraesCS2A02G545900.1	179	185	MYB-like sequence	TAACCA	NO
TraesCS2A02G545900.1	843	849	GC-motif	CCCCCG	enhancer-like element involved in anoxic specific inducibility
TraesCS2A02G545900.1	1057	1063	GC-motif	CCCCCG	enhancer-like element involved in anoxic specific inducibility
TraesCS2A02G545900.1	18	25	TATA-box	TATAA/TATA/TACAAAA	core promoter element around -30 of transcription start
TraesCS2A02G545900.1	25	31	TATA-box	TATAA/TATA/TACAAAA	core promoter element around -30 of transcription start
TraesCS2A02G545900.1	26	30	TATA-box	TATAA/TATA/TACAAAA	core promoter element around -30 of transcription start
TraesCS2A02G545900.1	68	73	TATA-box	TATAA/TATA/TACAAAA	core promoter element around -30 of transcription start
TraesCS2A02G545900.1	69	73	TATA-box	TATAA/TATA/TACAAAA	core promoter element around -30 of transcription start
TraesCS2A02G545900.1	91	98	TATA-box	TATAA/TATA/TACAAAA	core promoter element around -30 of transcription start
TraesCS2A02G545900.1	441	445	TATA-box	TATAA/TATA/TACAAAA	core promoter element around -30 of transcription start
TraesCS2A02G545900.1	575	584	TATA-box	TATAA/TATA/TACAAAA	core promoter element around -30 of transcription start
TraesCS2A02G545900.1	1118	1124	TATA-box	TATAA/TATA/TACAAAA	core promoter element around -30 of transcription start
TraesCS2A02G545900.1	1119	1123	TATA-box	TATAA/TATA/TACAAAA	core promoter element around -30 of transcription start
TraesCS2A02G545900.1	1297	1306	TATA-box	TATAA/TATA/TACAAAA	core promoter element around -30 of transcription start
TraesCS2A02G545900.1	1298	1305	TATA-box	TATAA/TATA/TACAAAA	core promoter element around -30 of transcription start
TraesCS2A02G545900.1	1299	1305	TATA-box	TATAA/TATA/TACAAAA	core promoter element around -30 of transcription start
TraesCS2A02G545900.1	1300	1307	TATA-box	TATAA/TATA/TACAAAA	core promoter element around -30 of transcription start
TraesCS2A02G545900.1	1301	1307	TATA-box	TATAA/TATA/TACAAAA	core promoter element around -30 of transcription start
TraesCS2A02G545900.1	1302	1308	TATA-box	TATAA/TATA/TACAAAA	core promoter element around -30 of transcription start
TraesCS2A02G545900.1	1303	1309	TATA-box	TATAA/TATA/TACAAAA	core promoter element around -30 of transcription start
TraesCS2A02G545900.1	1305	1309	TATA-box	TATAA/TATA/TACAAAA	core promoter element around -30 of transcription start
TraesCS2A02G545900.1	1364	1370	TATA-box	TATAA/TATA/TACAAAA	core promoter element around -30 of transcription start
TraesCS2A02G545900.1	1365	1372	TATA-box	TATAA/TATA/TACAAAA	core promoter element around -30 of transcription start
TraesCS2A02G545900.1	1366	1372	TATA-box	TATAA/TATA/TACAAAA	core promoter element around -30 of transcription start
TraesCS2A02G545900.1	1368	1372	TATA-box	TATAA/TATA/TACAAAA	core promoter element around -30 of transcription start
TraesCS2A02G545900.1	1410	1414	TATA-box	TATAA/TATA/TACAAAA	core promoter element around -30 of transcription start
TraesCS2A02G545900.1	1351	1357	Myb-binding site	CAACAG	NO
TraesCS2A02G545900.1	276	282	G-box	CACGTC	involved in light responsiveness
TraesCS2A02G545900.1	672	678	G-box	CACGTC	involved in light responsiveness
TraesCS2A02G545900.1	683	689	G-box	CACGTC	involved in light responsiveness
TraesCS2A02G545900.1	718	724	G-box	CACGTC	involved in light responsiveness
TraesCS2A02G545900.1	1486	1492	G-box	CACGTC	involved in light responsiveness
TraesCS2A02G545900.1	318	326	ERE	ATTTTAAA	NO
TraesCS2A02G545900.1	1299	1307	AT~TATA-box	TATATA	NO
TraesCS2A02G545900.1	1301	1307	AT~TATA-box	TATATA	NO
TraesCS2A02G545900.1	1303	1309	AT~TATA-box	TATATA	NO
TraesCS2A02G545900.1	1366	1372	AT~TATA-box	TATATA	NO
TraesCS2A02G545900.1	618	624	LTR	CCGAAA	involved in low-temperature responsiveness
TraesCS2A02G545900.1	492	498	DRE core	GCCGAC	NO
TraesCS2A02G545900.1	924	930	DRE core	GCCGAC	NO
TraesCS2A02G545900.1	968	974	MBS	CAACTG	MYB binding site involved in drought-inducibility
TraesCS2A02G545900.1	259	264	TGACG-motif	TGACG	cis-acting regulatory element involved in the MeJA-responsiveness
TraesCS2A02G545900.1	411	416	TGACG-motif	TGACG	cis-acting regulatory element involved in the MeJA-responsiveness
TraesCS2A02G545900.1	756	761	TGACG-motif	TGACG	cis-acting regulatory element involved in the MeJA-responsiveness
TraesCS2A02G545900.1	981	987	WRE3	CCACCT	NO
TraesCS2A02G545900.1	179	185	MYB	CAACAG/CAACCA/TAACCA	NO
TraesCS2A02G545900.1	1351	1357	MYB	CAACAG/CAACCA/TAACCA	NO
TraesCS2A02G545900.1	1442	1448	MYB	CAACAG/CAACCA/TAACCA	NO
TraesCS2A02G545900.1	689	694	STRE	AGGGG	NO
TraesCS2A02G545900.1	800	805	STRE	AGGGG	NO
TraesCS2A02G545900.1	1435	1440	STRE	AGGGG	NO
TraesCS2A02G545900.1	4	10	TCT-motif	TCTTAC	part of a light responsive element
TraesCS2A02G545900.1	211	218	MRE	AACCTAA	MYB binding site involved in light responsiveness
TraesCS2B02G144500.1	277	283	G-Box	CACGTC	involved in light responsiveness
TraesCS2B02G144500.1	407	413	G-Box	CACGTC	involved in light responsiveness
TraesCS2B02G144500.1	823	829	Myb-binding site	CAACAG	NO
TraesCS2B02G144500.1	1159	1165	ABRE3a	TACGTG	NO
TraesCS2B02G144500.1	378	384	TGA-element	AACGAC	auxin-responsive element
TraesCS2B02G144500.1	277	283	G-box	CACGTC	involved in light responsiveness
TraesCS2B02G144500.1	407	413	G-box	CACGTC	involved in light responsiveness
TraesCS2B02G144500.1	585	591	G-box	CACGTC	involved in light responsiveness
TraesCS2B02G144500.1	1111	1117	G-box	CACGTC	involved in light responsiveness
TraesCS2B02G144500.1	1159	1165	G-box	CACGTC	involved in light responsiveness
TraesCS2B02G144500.1	182	191	GC-motif	CCCCCG	enhancer-like element involved in anoxic specific inducibility
TraesCS2B02G144500.1	701	707	GC-motif	CCCCCG	enhancer-like element involved in anoxic specific inducibility
TraesCS2B02G144500.1	851	855	TATA-box	TATAA/TATA/TACAAAA	core promoter element around -30 of transcription start
TraesCS2B02G144500.1	1312	1318	W box	TTGACC	NO
TraesCS2B02G144500.1	1116	1124	HD-Zip 1	CAAT(A/T)ATTG	element involved in differentiation of the palisade mesophyll cells
TraesCS2B02G144500.1	1159	1165	ABRE4	CACGTA	NO
TraesCS2B02G144500.1	139	145	ARE	AAACCA	cis-acting regulatory element essential for the anaerobic induction
TraesCS2B02G144500.1	577	583	ARE	AAACCA	cis-acting regulatory element essential for the anaerobic induction
TraesCS2B02G144500.1	62	68	Myb	CAACTG	NO
TraesCS2B02G144500.1	1194	1200	Myb	CAACTG	NO
TraesCS2B02G144500.1	230	235	STRE	AGGGG	NO
TraesCS2B02G144500.1	259	264	STRE	AGGGG	NO
TraesCS2B02G144500.1	650	655	STRE	AGGGG	NO
TraesCS2B02G144500.1	72	78	WRE3	CCACCT	NO
TraesCS2B02G144500.1	841	847	WRE3	CCACCT	NO
TraesCS2B02G144500.1	275	284	ABRE	ACGTG	involved in the abscisic acid responsiveness
TraesCS2B02G144500.1	277	283	ABRE	ACGTG	involved in the abscisic acid responsiveness
TraesCS2B02G144500.1	278	283	ABRE	ACGTG	involved in the abscisic acid responsiveness
TraesCS2B02G144500.1	407	413	ABRE	ACGTG	involved in the abscisic acid responsiveness
TraesCS2B02G144500.1	408	413	ABRE	ACGTG	involved in the abscisic acid responsiveness
TraesCS2B02G144500.1	1160	1165	ABRE	ACGTG	involved in the abscisic acid responsiveness
TraesCS2B02G144500.1	823	829	MYB	CAACAG/CAACCA/TAACCA	NO
TraesCS2B02G144500.1	1288	1294	MYB recognition site	CCGTTG	NO
TraesCS2B02G144500.1	1099	1104	TGACG-motif	TGACG	cis-acting regulatory element involved in the MeJA-responsiveness
TraesCS2B02G144500.1	1425	1430	TGACG-motif	TGACG	cis-acting regulatory element involved in the MeJA-responsiveness
TraesCS2B02G144500.1	62	68	MBS	CAACTG	MYB binding site involved in drought-inducibility
TraesCS2B02G144500.1	1194	1200	MBS	CAACTG	MYB binding site involved in drought-inducibility
TraesCS2B02G144500.1	325	331	DRE core	GCCGAC	NO
TraesCS2B02G144500.1	1044	1050	DRE core	GCCGAC	NO
TraesCS2B02G170200.1	32	36	TATA-box	TATAA/TATA/TACAAAA	core promoter element around -30 of transcription start
TraesCS2B02G170200.1	64	70	TATA-box	TATAA/TATA/TACAAAA	core promoter element around -30 of transcription start
TraesCS2B02G170200.1	65	69	TATA-box	TATAA/TATA/TACAAAA	core promoter element around -30 of transcription start
TraesCS2B02G170200.1	192	198	TATA-box	TATAA/TATA/TACAAAA	core promoter element around -30 of transcription start
TraesCS2B02G170200.1	193	197	TATA-box	TATAA/TATA/TACAAAA	core promoter element around -30 of transcription start
TraesCS2B02G170200.1	600	604	TATA-box	TATAA/TATA/TACAAAA	core promoter element around -30 of transcription start
TraesCS2B02G170200.1	739	743	TATA-box	TATAA/TATA/TACAAAA	core promoter element around -30 of transcription start
TraesCS2B02G170200.1	862	869	TATA-box	TATAA/TATA/TACAAAA	core promoter element around -30 of transcription start
TraesCS2B02G170200.1	863	869	TATA-box	TATAA/TATA/TACAAAA	core promoter element around -30 of transcription start
TraesCS2B02G170200.1	864	869	TATA-box	TATAA/TATA/TACAAAA	core promoter element around -30 of transcription start
TraesCS2B02G170200.1	865	869	TATA-box	TATAA/TATA/TACAAAA	core promoter element around -30 of transcription start
TraesCS2B02G170200.1	1223	1230	TATA-box	TATAA/TATA/TACAAAA	core promoter element around -30 of transcription start
TraesCS2B02G170200.1	1224	1230	TATA-box	TATAA/TATA/TACAAAA	core promoter element around -30 of transcription start
TraesCS2B02G170200.1	1225	1230	TATA-box	TATAA/TATA/TACAAAA	core promoter element around -30 of transcription start
TraesCS2B02G170200.1	1226	1230	TATA-box	TATAA/TATA/TACAAAA	core promoter element around -30 of transcription start
TraesCS2B02G170200.1	957	963	W box	TTGACC	NO
TraesCS2B02G170200.1	171	177	Myb	CAACTG	NO
TraesCS2B02G170200.1	996	1002	ARE	AAACCA	cis-acting regulatory element essential for the anaerobic induction
TraesCS2B02G170200.1	666	672	G-Box	CACGTC	involved in light responsiveness
TraesCS2B02G170200.1	664	673	G-box	CACGTC	involved in light responsiveness
TraesCS2B02G170200.1	666	672	G-box	CACGTC	involved in light responsiveness
TraesCS2B02G170200.1	301	308	P-box	CCTTTTG	gibberellin-responsive element
TraesCS2B02G170200.1	1406	1413	AAGAA-motif	GAAAGAA	NO
TraesCS2B02G170200.1	79	84	TGACG-motif	TGACG	cis-acting regulatory element involved in the MeJA-responsiveness
TraesCS2B02G170200.1	171	177	MBS	CAACTG	MYB binding site involved in drought-inducibility
TraesCS2B02G170200.1	397	403	LTR	CCGAAA	involved in low-temperature responsiveness
TraesCS2B02G170200.1	1351	1356	STRE	AGGGG	NO
TraesCS2B02G170200.1	1470	1475	STRE	AGGGG	NO
TraesCS2B02G170200.1	470	476	MYB	CAACAG/CAACCA/TAACCA	NO
TraesCS2B02G170200.1	498	504	MYB	CAACAG/CAACCA/TAACCA	NO
TraesCS2B02G170200.1	1019	1025	MYB	CAACAG/CAACCA/TAACCA	NO
TraesCS2B02G170200.1	1010	1016	WRE3	CCACCT	NO
TraesCS2B02G170200.1	1434	1440	WRE3	CCACCT	NO
TraesCS2B02G170200.1	666	672	ABRE	ACGTG	involved in the abscisic acid responsiveness
TraesCS2B02G170200.1	667	672	ABRE	ACGTG	involved in the abscisic acid responsiveness
TraesCS2B02G170200.1	1213	1220	ABRE	ACGTG	involved in the abscisic acid responsiveness
TraesCS2B02G250800.1	724	729	STRE	AGGGG	NO
TraesCS2B02G250800.1	1317	1322	STRE	AGGGG	NO
TraesCS2B02G250800.1	790	799	MSA-like	TCAAACGGT	cis-acting element involved in cell cycle regulation
TraesCS2B02G250800.1	1268	1273	TGACG-motif	TGACG	cis-acting regulatory element involved in the MeJA-responsiveness
TraesCS2B02G250800.1	400	406	MBS	CAACTG	MYB binding site involved in drought-inducibility
TraesCS2B02G250800.1	422	428	MBS	CAACTG	MYB binding site involved in drought-inducibility
TraesCS2B02G250800.1	483	489	DRE core	GCCGAC	NO
TraesCS2B02G250800.1	1428	1434	DRE core	GCCGAC	NO
TraesCS2B02G250800.1	1235	1241	LTR	CCGAAA	involved in low-temperature responsiveness
TraesCS2B02G250800.1	683	692	WUN-motif	AAATTTCCT	wound-responsive element
TraesCS2B02G250800.1	376	383	TATA-box	TATAA/TATA/TACAAAA	core promoter element around -30 of transcription start
TraesCS2B02G250800.1	1444	1450	GC-motif	CCCCCG	enhancer-like element involved in anoxic specific inducibility
TraesCS2B02G250800.1	1284	1290	Sp1	GGGCGG	light responsive element
TraesCS2B02G250800.1	1465	1471	Sp1	GGGCGG	light responsive element
TraesCS2B02G250800.1	534	540	MYC	CATGTG	NO
TraesCS2B02G250800.1	604	610	MYC	CATGTG	NO
TraesCS2B02G250800.1	715	721	MYC	CATGTG	NO
TraesCS2B02G250800.1	752	758	MYC	CATGTG	NO
TraesCS2B02G250800.1	397	403	W box	TTGACC	NO
TraesCS2B02G250800.1	444	450	W box	TTGACC	NO
TraesCS2B02G250800.1	400	406	Myb	CAACTG	NO
TraesCS2B02G250800.1	422	428	Myb	CAACTG	NO
TraesCS2B02G250800.1	349	355	ARE	AAACCA	cis-acting regulatory element essential for the anaerobic induction
TraesCS2B02G250800.1	1321	1328	TCCC-motif	TCTCCCT	part of a light responsive element
TraesCS2B02G389600.1	262	269	GT1-motif	GGTTAAT/GGTTAA	light responsive element
TraesCS2B02G389600.1	179	185	MYB	CAACAG/CAACCA/TAACCA	NO
TraesCS2B02G389600.1	202	208	MYB	CAACAG/CAACCA/TAACCA	NO
TraesCS2B02G389600.1	261	267	MYB	CAACAG/CAACCA/TAACCA	NO
TraesCS2B02G389600.1	390	396	MYB	CAACAG/CAACCA/TAACCA	NO
TraesCS2B02G389600.1	432	438	MYB	CAACAG/CAACCA/TAACCA	NO
TraesCS2B02G389600.1	577	583	MYB	CAACAG/CAACCA/TAACCA	NO
TraesCS2B02G389600.1	941	947	MYB	CAACAG/CAACCA/TAACCA	NO
TraesCS2B02G389600.1	1312	1318	MYB	CAACAG/CAACCA/TAACCA	NO
TraesCS2B02G389600.1	386	392	WRE3	CCACCT	NO
TraesCS2B02G389600.1	502	508	WRE3	CCACCT	NO
TraesCS2B02G389600.1	1491	1497	WRE3	CCACCT	NO
TraesCS2B02G389600.1	451	456	ABRE	ACGTG	involved in the abscisic acid responsiveness
TraesCS2B02G389600.1	183	190	TATC-box	TATCCCA	cis-acting element involved in gibberellin-responsiveness
TraesCS2B02G389600.1	1228	1235	TATC-box	TATCCCA	cis-acting element involved in gibberellin-responsiveness
TraesCS2B02G389600.1	218	223	STRE	AGGGG	NO
TraesCS2B02G389600.1	1062	1067	STRE	AGGGG	NO
TraesCS2B02G389600.1	1172	1177	STRE	AGGGG	NO
TraesCS2B02G389600.1	1193	1199	MBS	CAACTG	MYB binding site involved in drought-inducibility
TraesCS2B02G389600.1	197	202	TGACG-motif	TGACG	cis-acting regulatory element involved in the MeJA-responsiveness
TraesCS2B02G389600.1	945	952	GCN4_motif	TGAGTCA	involved in endosperm expression
TraesCS2B02G389600.1	358	364	TGA-element	AACGAC	auxin-responsive element
TraesCS2B02G389600.1	202	208	Myb-binding site	CAACAG	NO
TraesCS2B02G389600.1	390	396	Myb-binding site	CAACAG	NO
TraesCS2B02G389600.1	577	583	Myb-binding site	CAACAG	NO
TraesCS2B02G389600.1	941	947	Myb-binding site	CAACAG	NO
TraesCS2B02G389600.1	137	143	AT~TATA-box	TATATA	NO
TraesCS2B02G389600.1	1233	1239	AT~TATA-box	TATATA	NO
TraesCS2B02G389600.1	450	456	G-Box	CACGTC	involved in light responsiveness
TraesCS2B02G389600.1	307	314	P-box	CCTTTTG	gibberellin-responsive element
TraesCS2B02G389600.1	1174	1181	P-box	CCTTTTG	gibberellin-responsive element
TraesCS2B02G389600.1	730	736	W box	TTGACC	NO
TraesCS2B02G389600.1	726	732	Sp1	GGGCGG	light responsive element
TraesCS2B02G389600.1	164	170	MYC	CATGTG	NO
TraesCS2B02G389600.1	412	418	MYC	CATGTG	NO
TraesCS2B02G389600.1	1009	1015	MYC	CATGTG	NO
TraesCS2B02G389600.1	1308	1314	MYC	CATGTG	NO
TraesCS2B02G389600.1	22	26	TATA-box	TATAA/TATA/TACAAAA	core promoter element around -30 of transcription start
TraesCS2B02G389600.1	50	56	TATA-box	TATAA/TATA/TACAAAA	core promoter element around -30 of transcription start
TraesCS2B02G389600.1	51	55	TATA-box	TATAA/TATA/TACAAAA	core promoter element around -30 of transcription start
TraesCS2B02G389600.1	137	143	TATA-box	TATAA/TATA/TACAAAA	core promoter element around -30 of transcription start
TraesCS2B02G389600.1	138	144	TATA-box	TATAA/TATA/TACAAAA	core promoter element around -30 of transcription start
TraesCS2B02G389600.1	139	143	TATA-box	TATAA/TATA/TACAAAA	core promoter element around -30 of transcription start
TraesCS2B02G389600.1	644	650	TATA-box	TATAA/TATA/TACAAAA	core promoter element around -30 of transcription start
TraesCS2B02G389600.1	645	650	TATA-box	TATAA/TATA/TACAAAA	core promoter element around -30 of transcription start
TraesCS2B02G389600.1	646	650	TATA-box	TATAA/TATA/TACAAAA	core promoter element around -30 of transcription start
TraesCS2B02G389600.1	1021	1026	TATA-box	TATAA/TATA/TACAAAA	core promoter element around -30 of transcription start
TraesCS2B02G389600.1	1022	1026	TATA-box	TATAA/TATA/TACAAAA	core promoter element around -30 of transcription start
TraesCS2B02G389600.1	1027	1032	TATA-box	TATAA/TATA/TACAAAA	core promoter element around -30 of transcription start
TraesCS2B02G389600.1	1028	1032	TATA-box	TATAA/TATA/TACAAAA	core promoter element around -30 of transcription start
TraesCS2B02G389600.1	1232	1238	TATA-box	TATAA/TATA/TACAAAA	core promoter element around -30 of transcription start
TraesCS2B02G389600.1	1233	1239	TATA-box	TATAA/TATA/TACAAAA	core promoter element around -30 of transcription start
TraesCS2B02G389600.1	1234	1240	TATA-box	TATAA/TATA/TACAAAA	core promoter element around -30 of transcription start
TraesCS2B02G389600.1	1235	1239	TATA-box	TATAA/TATA/TACAAAA	core promoter element around -30 of transcription start
TraesCS2B02G389600.1	1315	1320	TATA-box	TATAA/TATA/TACAAAA	core promoter element around -30 of transcription start
TraesCS2B02G389600.1	1316	1320	TATA-box	TATAA/TATA/TACAAAA	core promoter element around -30 of transcription start
TraesCS2B02G389600.1	261	267	MYB-like sequence	TAACCA	NO
TraesCS2B02G389600.1	1312	1318	MYB-like sequence	TAACCA	NO
TraesCS2B02G389600.1	1193	1199	Myb	CAACTG	NO
TraesCS2B02G389600.1	517	523	ARE	AAACCA	cis-acting regulatory element essential for the anaerobic induction
TraesCS2B02G389600.1	769	775	ARE	AAACCA	cis-acting regulatory element essential for the anaerobic induction
TraesCS2B02G389600.1	774	780	ARE	AAACCA	cis-acting regulatory element essential for the anaerobic induction
TraesCS2B02G504600.1	20	25	TGACG-motif	TGACG	cis-acting regulatory element involved in the MeJA-responsiveness
TraesCS2B02G504600.1	1195	1200	TGACG-motif	TGACG	cis-acting regulatory element involved in the MeJA-responsiveness
TraesCS2B02G504600.1	187	193	DRE core	GCCGAC	NO
TraesCS2B02G504600.1	1046	1052	DRE core	GCCGAC	NO
TraesCS2B02G504600.1	1407	1413	TCT-motif	TCTTAC	part of a light responsive element
TraesCS2B02G504600.1	113	118	STRE	AGGGG	NO
TraesCS2B02G504600.1	234	239	STRE	AGGGG	NO
TraesCS2B02G504600.1	742	747	STRE	AGGGG	NO
TraesCS2B02G504600.1	1440	1445	STRE	AGGGG	NO
TraesCS2B02G504600.1	73	80	ABRE	ACGTG	involved in the abscisic acid responsiveness
TraesCS2B02G504600.1	1393	1398	ABRE	ACGTG	involved in the abscisic acid responsiveness
TraesCS2B02G504600.1	735	741	MYB recognition site	CCGTTG	NO
TraesCS2B02G504600.1	1449	1455	MYB recognition site	CCGTTG	NO
TraesCS2B02G504600.1	96	102	GC-motif	CCCCCG	enhancer-like element involved in anoxic specific inducibility
TraesCS2B02G504600.1	286	292	GC-motif	CCCCCG	enhancer-like element involved in anoxic specific inducibility
TraesCS2B02G504600.1	1055	1061	GC-motif	CCCCCG	enhancer-like element involved in anoxic specific inducibility
TraesCS2B02G504600.1	311	317	Sp1	GGGCGG	light responsive element
TraesCS2B02G504600.1	315	321	Sp1	GGGCGG	light responsive element
TraesCS2B02G504600.1	773	779	Sp1	GGGCGG	light responsive element
TraesCS2B02G504600.1	786	792	Sp1	GGGCGG	light responsive element
TraesCS2B02G504600.1	891	897	Sp1	GGGCGG	light responsive element
TraesCS2B02G504600.1	166	174	re2f-1	GCGGGAAA	NO
TraesCS2B02G504600.1	1226	1232	ARE	AAACCA	cis-acting regulatory element essential for the anaerobic induction
TraesCS2B02G504600.1	1392	1398	G-Box	CACGTC	involved in light responsiveness
TraesCS2B02G504600.1	248	254	G-box	CACGTC	involved in light responsiveness
TraesCS2B02G504600.1	803	812	G-box	CACGTC	involved in light responsiveness
TraesCS2B02G504600.1	1296	1302	G-box	CACGTC	involved in light responsiveness
TraesCS2B02G576800.1	653	659	Myb	CAACTG	NO
TraesCS2B02G576800.1	933	939	Myb	CAACTG	NO
TraesCS2B02G576800.1	1355	1361	Myb	CAACTG	NO
TraesCS2B02G576800.1	171	177	MYC	CATGTG	NO
TraesCS2B02G576800.1	208	214	MYC	CATGTG	NO
TraesCS2B02G576800.1	323	329	MYC	CATGTG	NO
TraesCS2B02G576800.1	364	370	MYC	CATGTG	NO
TraesCS2B02G576800.1	462	468	MYC	CATGTG	NO
TraesCS2B02G576800.1	493	499	MYC	CATGTG	NO
TraesCS2B02G576800.1	525	531	MYC	CATGTG	NO
TraesCS2B02G576800.1	555	561	MYC	CATGTG	NO
TraesCS2B02G576800.1	896	902	MYC	CATGTG	NO
TraesCS2B02G576800.1	1188	1194	MYC	CATGTG	NO
TraesCS2B02G576800.1	856	862	Sp1	GGGCGG	light responsive element
TraesCS2B02G576800.1	110	116	MYB-like sequence	TAACCA	NO
TraesCS2B02G576800.1	33	37	TATA-box	TATAA/TATA/TACAAAA	core promoter element around -30 of transcription start
TraesCS2B02G576800.1	176	185	TATA-box	TATAA/TATA/TACAAAA	core promoter element around -30 of transcription start
TraesCS2B02G576800.1	177	184	TATA-box	TATAA/TATA/TACAAAA	core promoter element around -30 of transcription start
TraesCS2B02G576800.1	178	184	TATA-box	TATAA/TATA/TACAAAA	core promoter element around -30 of transcription start
TraesCS2B02G576800.1	179	184	TATA-box	TATAA/TATA/TACAAAA	core promoter element around -30 of transcription start
TraesCS2B02G576800.1	180	184	TATA-box	TATAA/TATA/TACAAAA	core promoter element around -30 of transcription start
TraesCS2B02G576800.1	200	207	TATA-box	TATAA/TATA/TACAAAA	core promoter element around -30 of transcription start
TraesCS2B02G576800.1	201	207	TATA-box	TATAA/TATA/TACAAAA	core promoter element around -30 of transcription start
TraesCS2B02G576800.1	202	207	TATA-box	TATAA/TATA/TACAAAA	core promoter element around -30 of transcription start
TraesCS2B02G576800.1	203	207	TATA-box	TATAA/TATA/TACAAAA	core promoter element around -30 of transcription start
TraesCS2B02G576800.1	419	423	TATA-box	TATAA/TATA/TACAAAA	core promoter element around -30 of transcription start
TraesCS2B02G576800.1	499	508	TATA-box	TATAA/TATA/TACAAAA	core promoter element around -30 of transcription start
TraesCS2B02G576800.1	590	599	TATA-box	TATAA/TATA/TACAAAA	core promoter element around -30 of transcription start
TraesCS2B02G576800.1	1304	1313	TATA-box	TATAA/TATA/TACAAAA	core promoter element around -30 of transcription start
TraesCS2B02G576800.1	1305	1312	TATA-box	TATAA/TATA/TACAAAA	core promoter element around -30 of transcription start
TraesCS2B02G576800.1	1306	1312	TATA-box	TATAA/TATA/TACAAAA	core promoter element around -30 of transcription start
TraesCS2B02G576800.1	1307	1314	TATA-box	TATAA/TATA/TACAAAA	core promoter element around -30 of transcription start
TraesCS2B02G576800.1	1308	1314	TATA-box	TATAA/TATA/TACAAAA	core promoter element around -30 of transcription start
TraesCS2B02G576800.1	1309	1315	TATA-box	TATAA/TATA/TACAAAA	core promoter element around -30 of transcription start
TraesCS2B02G576800.1	1310	1316	TATA-box	TATAA/TATA/TACAAAA	core promoter element around -30 of transcription start
TraesCS2B02G576800.1	1312	1316	TATA-box	TATAA/TATA/TACAAAA	core promoter element around -30 of transcription start
TraesCS2B02G576800.1	1371	1377	TATA-box	TATAA/TATA/TACAAAA	core promoter element around -30 of transcription start
TraesCS2B02G576800.1	1372	1379	TATA-box	TATAA/TATA/TACAAAA	core promoter element around -30 of transcription start
TraesCS2B02G576800.1	1373	1379	TATA-box	TATAA/TATA/TACAAAA	core promoter element around -30 of transcription start
TraesCS2B02G576800.1	1375	1379	TATA-box	TATAA/TATA/TACAAAA	core promoter element around -30 of transcription start
TraesCS2B02G576800.1	1416	1422	TATA-box	TATAA/TATA/TACAAAA	core promoter element around -30 of transcription start
TraesCS2B02G576800.1	1418	1422	TATA-box	TATAA/TATA/TACAAAA	core promoter element around -30 of transcription start
TraesCS2B02G576800.1	1064	1070	GC-motif	CCCCCG	enhancer-like element involved in anoxic specific inducibility
TraesCS2B02G576800.1	1358	1364	Myb-binding site	CAACAG	NO
TraesCS2B02G576800.1	237	243	G-box	CACGTC	involved in light responsiveness
TraesCS2B02G576800.1	248	254	G-box	CACGTC	involved in light responsiveness
TraesCS2B02G576800.1	681	687	G-box	CACGTC	involved in light responsiveness
TraesCS2B02G576800.1	692	698	G-box	CACGTC	involved in light responsiveness
TraesCS2B02G576800.1	728	734	G-box	CACGTC	involved in light responsiveness
TraesCS2B02G576800.1	1221	1227	G-box	CACGTC	involved in light responsiveness
TraesCS2B02G576800.1	1486	1492	G-box	CACGTC	involved in light responsiveness
TraesCS2B02G576800.1	577	585	ERE	ATTTTAAA	NO
TraesCS2B02G576800.1	248	254	G-Box	CACGTC	involved in light responsiveness
TraesCS2B02G576800.1	1306	1314	AT~TATA-box	TATATA	NO
TraesCS2B02G576800.1	1308	1314	AT~TATA-box	TATATA	NO
TraesCS2B02G576800.1	1310	1316	AT~TATA-box	TATATA	NO
TraesCS2B02G576800.1	1373	1379	AT~TATA-box	TATATA	NO
TraesCS2B02G576800.1	632	638	LTR	CCGAAA	involved in low-temperature responsiveness
TraesCS2B02G576800.1	747	753	DRE core	GCCGAC	NO
TraesCS2B02G576800.1	940	946	DRE core	GCCGAC	NO
TraesCS2B02G576800.1	653	659	MBS	CAACTG	MYB binding site involved in drought-inducibility
TraesCS2B02G576800.1	933	939	MBS	CAACTG	MYB binding site involved in drought-inducibility
TraesCS2B02G576800.1	1116	1121	TGACG-motif	TGACG	cis-acting regulatory element involved in the MeJA-responsiveness
TraesCS2B02G576800.1	238	243	ABRE	ACGTG	involved in the abscisic acid responsiveness
TraesCS2B02G576800.1	248	254	ABRE	ACGTG	involved in the abscisic acid responsiveness
TraesCS2B02G576800.1	249	254	ABRE	ACGTG	involved in the abscisic acid responsiveness
TraesCS2B02G576800.1	1138	1145	ABRE	ACGTG	involved in the abscisic acid responsiveness
TraesCS2B02G576800.1	1221	1226	ABRE	ACGTG	involved in the abscisic acid responsiveness
TraesCS2B02G576800.1	999	1005	WRE3	CCACCT	NO
TraesCS2B02G576800.1	110	116	MYB	CAACAG/CAACCA/TAACCA	NO
TraesCS2B02G576800.1	1358	1364	MYB	CAACAG/CAACCA/TAACCA	NO
TraesCS2B02G576800.1	1450	1456	MYB	CAACAG/CAACCA/TAACCA	NO
TraesCS2B02G576800.1	307	312	STRE	AGGGG	NO
TraesCS2B02G576800.1	622	627	STRE	AGGGG	NO
TraesCS2B02G576800.1	698	703	STRE	AGGGG	NO
TraesCS2B02G576800.1	803	808	STRE	AGGGG	NO
TraesCS2B02G576800.1	837	842	STRE	AGGGG	NO
TraesCS2B02G576800.1	1443	1448	STRE	AGGGG	NO
TraesCS2B02G576800.1	257	263	TCT-motif	TCTTAC	part of a light responsive element
TraesCS2D02G125100.1	1070	1076	Myb	CAACTG	NO
TraesCS2D02G125100.1	56	62	ABRE4	CACGTA	NO
TraesCS2D02G125100.1	1302	1308	W box	TTGACC	NO
TraesCS2D02G125100.1	92	98	MYC	CATGTG	NO
TraesCS2D02G125100.1	202	208	MYC	CATGTG	NO
TraesCS2D02G125100.1	428	434	MYC	CATGTG	NO
TraesCS2D02G125100.1	686	692	MYC	CATGTG	NO
TraesCS2D02G125100.1	1183	1189	MYC	CATGTG	NO
TraesCS2D02G125100.1	240	247	GATA-motif	AAGGATAAGG	part of a light responsive element
TraesCS2D02G125100.1	1003	1009	MYB-like sequence	TAACCA	NO
TraesCS2D02G125100.1	875	884	TC-rich repeats	ATTCTCTAAC	cis-acting element involved in defense and stress responsiveness
TraesCS2D02G125100.1	609	613	TATA-box	TATAA/TATA/TACAAAA	core promoter element around -30 of transcription start
TraesCS2D02G125100.1	791	800	TATA-box	TATAA/TATA/TACAAAA	core promoter element around -30 of transcription start
TraesCS2D02G125100.1	1090	1098	TATA-box	TATAA/TATA/TACAAAA	core promoter element around -30 of transcription start
TraesCS2D02G125100.1	1245	1251	TATA-box	TATAA/TATA/TACAAAA	core promoter element around -30 of transcription start
TraesCS2D02G125100.1	1246	1251	TATA-box	TATAA/TATA/TACAAAA	core promoter element around -30 of transcription start
TraesCS2D02G125100.1	1247	1251	TATA-box	TATAA/TATA/TACAAAA	core promoter element around -30 of transcription start
TraesCS2D02G125100.1	95	102	AuxRR-core	GGTCCAT	involved in auxin responsiveness
TraesCS2D02G125100.1	56	62	G-box	CACGTC	involved in light responsiveness
TraesCS2D02G125100.1	156	165	G-box	CACGTC	involved in light responsiveness
TraesCS2D02G125100.1	158	164	G-box	CACGTC	involved in light responsiveness
TraesCS2D02G125100.1	719	725	G-box	CACGTC	involved in light responsiveness
TraesCS2D02G125100.1	56	62	ABRE3a	TACGTG	NO
TraesCS2D02G125100.1	1119	1125	G-Box	CACGTC	involved in light responsiveness
TraesCS2D02G125100.1	935	941	LTR	CCGAAA	involved in low-temperature responsiveness
TraesCS2D02G125100.1	1018	1025	Myc	CATGTG	NO
TraesCS2D02G125100.1	106	113	GCN4_motif	TGAGTCA	involved in endosperm expression
TraesCS2D02G125100.1	1371	1378	AAGAA-motif	GAAAGAA	NO
TraesCS2D02G125100.1	1418	1423	TGACG-motif	TGACG	cis-acting regulatory element involved in the MeJA-responsiveness
TraesCS2D02G125100.1	1483	1488	TGACG-motif	TGACG	cis-acting regulatory element involved in the MeJA-responsiveness
TraesCS2D02G125100.1	57	62	ABRE	ACGTG	involved in the abscisic acid responsiveness
TraesCS2D02G125100.1	158	163	ABRE	ACGTG	involved in the abscisic acid responsiveness
TraesCS2D02G125100.1	233	240	ABRE	ACGTG	involved in the abscisic acid responsiveness
TraesCS2D02G125100.1	1119	1124	ABRE	ACGTG	involved in the abscisic acid responsiveness
TraesCS2D02G125100.1	1278	1284	MYB recognition site	CCGTTG	NO
TraesCS2D02G125100.1	859	865	MYB	CAACAG/CAACCA/TAACCA	NO
TraesCS2D02G125100.1	1003	1009	MYB	CAACAG/CAACCA/TAACCA	NO
TraesCS2D02G125100.1	459	464	STRE	AGGGG	NO
TraesCS2D02G125100.1	789	794	STRE	AGGGG	NO
TraesCS2D02G125100.1	1002	1008	GT1-motif	GGTTAAT/GGTTAA	light responsive element
TraesCS2D02G148900.1	670	676	DRE core	GCCGAC	NO
TraesCS2D02G148900.1	63	69	LTR	CCGAAA	involved in low-temperature responsiveness
TraesCS2D02G148900.1	1457	1463	LTR	CCGAAA	involved in low-temperature responsiveness
TraesCS2D02G148900.1	578	583	TGACG-motif	TGACG	cis-acting regulatory element involved in the MeJA-responsiveness
TraesCS2D02G148900.1	1148	1155	GCN4_motif	TGAGTCA	involved in endosperm expression
TraesCS2D02G148900.1	392	398	MBS	CAACTG	MYB binding site involved in drought-inducibility
TraesCS2D02G148900.1	1435	1440	STRE	AGGGG	NO
TraesCS2D02G148900.1	1470	1475	STRE	AGGGG	NO
TraesCS2D02G148900.1	1104	1110	MYB recognition site	CCGTTG	NO
TraesCS2D02G148900.1	450	456	MYB	CAACAG/CAACCA/TAACCA	NO
TraesCS2D02G148900.1	432	437	ABRE	ACGTG	involved in the abscisic acid responsiveness
TraesCS2D02G148900.1	545	550	ABRE	ACGTG	involved in the abscisic acid responsiveness
TraesCS2D02G148900.1	392	398	Myb	CAACTG	NO
TraesCS2D02G148900.1	781	787	Myb	CAACTG	NO
TraesCS2D02G148900.1	124	130	ARE	AAACCA	cis-acting regulatory element essential for the anaerobic induction
TraesCS2D02G148900.1	35	41	GC-motif	CCCCCG	enhancer-like element involved in anoxic specific inducibility
TraesCS2D02G148900.1	569	575	GC-motif	CCCCCG	enhancer-like element involved in anoxic specific inducibility
TraesCS2D02G148900.1	104	110	TATA-box	TATAA/TATA/TACAAAA	core promoter element around -30 of transcription start
TraesCS2D02G148900.1	105	111	TATA-box	TATAA/TATA/TACAAAA	core promoter element around -30 of transcription start
TraesCS2D02G148900.1	106	112	TATA-box	TATAA/TATA/TACAAAA	core promoter element around -30 of transcription start
TraesCS2D02G148900.1	107	111	TATA-box	TATAA/TATA/TACAAAA	core promoter element around -30 of transcription start
TraesCS2D02G148900.1	203	207	TATA-box	TATAA/TATA/TACAAAA	core promoter element around -30 of transcription start
TraesCS2D02G148900.1	205	212	TATA-box	TATAA/TATA/TACAAAA	core promoter element around -30 of transcription start
TraesCS2D02G148900.1	228	232	TATA-box	TATAA/TATA/TACAAAA	core promoter element around -30 of transcription start
TraesCS2D02G148900.1	986	990	TATA-box	TATAA/TATA/TACAAAA	core promoter element around -30 of transcription start
TraesCS2D02G148900.1	1068	1075	TATA-box	TATAA/TATA/TACAAAA	core promoter element around -30 of transcription start
TraesCS2D02G148900.1	1069	1075	TATA-box	TATAA/TATA/TACAAAA	core promoter element around -30 of transcription start
TraesCS2D02G148900.1	1070	1076	TATA-box	TATAA/TATA/TACAAAA	core promoter element around -30 of transcription start
TraesCS2D02G148900.1	1071	1075	TATA-box	TATAA/TATA/TACAAAA	core promoter element around -30 of transcription start
TraesCS2D02G148900.1	1108	1114	TATA-box	TATAA/TATA/TACAAAA	core promoter element around -30 of transcription start
TraesCS2D02G148900.1	1110	1114	TATA-box	TATAA/TATA/TACAAAA	core promoter element around -30 of transcription start
TraesCS2D02G148900.1	1140	1144	TATA-box	TATAA/TATA/TACAAAA	core promoter element around -30 of transcription start
TraesCS2D02G148900.1	1238	1245	TATA-box	TATAA/TATA/TACAAAA	core promoter element around -30 of transcription start
TraesCS2D02G148900.1	1239	1245	TATA-box	TATAA/TATA/TACAAAA	core promoter element around -30 of transcription start
TraesCS2D02G148900.1	1240	1245	TATA-box	TATAA/TATA/TACAAAA	core promoter element around -30 of transcription start
TraesCS2D02G148900.1	1241	1245	TATA-box	TATAA/TATA/TACAAAA	core promoter element around -30 of transcription start
TraesCS2D02G148900.1	1349	1353	TATA-box	TATAA/TATA/TACAAAA	core promoter element around -30 of transcription start
TraesCS2D02G148900.1	1406	1415	TC-rich repeats	ATTCTCTAAC	cis-acting element involved in defense and stress responsiveness
TraesCS2D02G148900.1	1098	1109	MBSI	TTTTTACGGTTA	MYB binding site involved in flavonoid biosynthetic genes regulation
TraesCS2D02G148900.1	631	637	MYC	CATGTG	NO
TraesCS2D02G148900.1	1209	1215	MYC	CATGTG	NO
TraesCS2D02G148900.1	95	101	W box	TTGACC	NO
TraesCS2D02G148900.1	1206	1212	W box	TTGACC	NO
TraesCS2D02G148900.1	1228	1234	W box	TTGACC	NO
TraesCS2D02G148900.1	537	544	AuxRR-core	GGTCCAT	involved in auxin responsiveness
TraesCS2D02G148900.1	1452	1461	I-box	GTATAAGGCC	part of a light responsive element
TraesCS2D02G148900.1	105	111	AT~TATA-box	TATATA	NO
TraesCS2D02G148900.1	1069	1075	AT~TATA-box	TATATA	NO
TraesCS2D02G148900.1	996	1004	WUN-motif	AAATTTCCT	wound-responsive element
TraesCS2D02G148900.1	316	322	TGA-element	AACGAC	auxin-responsive element
TraesCS2D02G148900.1	432	438	G-box	CACGTC	involved in light responsiveness
TraesCS2D02G148900.1	545	551	G-box	CACGTC	involved in light responsiveness
TraesCS2D02G148900.1	450	456	Myb-binding site	CAACAG	NO
TraesCS2D02G184700.1	19	24	ABRE	ACGTG	involved in the abscisic acid responsiveness
TraesCS2D02G184700.1	97	104	ABRE	ACGTG	involved in the abscisic acid responsiveness
TraesCS2D02G184700.1	119	128	ABRE	ACGTG	involved in the abscisic acid responsiveness
TraesCS2D02G184700.1	502	507	ABRE	ACGTG	involved in the abscisic acid responsiveness
TraesCS2D02G184700.1	593	598	ABRE	ACGTG	involved in the abscisic acid responsiveness
TraesCS2D02G184700.1	669	674	ABRE	ACGTG	involved in the abscisic acid responsiveness
TraesCS2D02G184700.1	699	706	ABRE	ACGTG	involved in the abscisic acid responsiveness
TraesCS2D02G184700.1	991	996	ABRE	ACGTG	involved in the abscisic acid responsiveness
TraesCS2D02G184700.1	1191	1200	ABRE	ACGTG	involved in the abscisic acid responsiveness
TraesCS2D02G184700.1	763	769	WRE3	CCACCT	NO
TraesCS2D02G184700.1	885	891	WRE3	CCACCT	NO
TraesCS2D02G184700.1	1403	1409	WRE3	CCACCT	NO
TraesCS2D02G184700.1	357	363	MYB	CAACAG/CAACCA/TAACCA	NO
TraesCS2D02G184700.1	606	615	MSA-like	TCAAACGGT	cis-acting element involved in cell cycle regulation
TraesCS2D02G184700.1	112	117	STRE	AGGGG	NO
TraesCS2D02G184700.1	404	409	STRE	AGGGG	NO
TraesCS2D02G184700.1	618	623	STRE	AGGGG	NO
TraesCS2D02G184700.1	640	645	STRE	AGGGG	NO
TraesCS2D02G184700.1	826	832	MBS	CAACTG	MYB binding site involved in drought-inducibility
TraesCS2D02G184700.1	24	29	TGACG-motif	TGACG	cis-acting regulatory element involved in the MeJA-responsiveness
TraesCS2D02G184700.1	415	420	TGACG-motif	TGACG	cis-acting regulatory element involved in the MeJA-responsiveness
TraesCS2D02G184700.1	591	596	TGACG-motif	TGACG	cis-acting regulatory element involved in the MeJA-responsiveness
TraesCS2D02G184700.1	1030	1035	TGACG-motif	TGACG	cis-acting regulatory element involved in the MeJA-responsiveness
TraesCS2D02G184700.1	1071	1076	TGACG-motif	TGACG	cis-acting regulatory element involved in the MeJA-responsiveness
TraesCS2D02G184700.1	944	950	DRE core	GCCGAC	NO
TraesCS2D02G184700.1	357	363	Myb-binding site	CAACAG	NO
TraesCS2D02G184700.1	19	25	G-box	CACGTC	involved in light responsiveness
TraesCS2D02G184700.1	193	199	G-box	CACGTC	involved in light responsiveness
TraesCS2D02G184700.1	243	249	G-box	CACGTC	involved in light responsiveness
TraesCS2D02G184700.1	320	326	G-box	CACGTC	involved in light responsiveness
TraesCS2D02G184700.1	502	508	G-box	CACGTC	involved in light responsiveness
TraesCS2D02G184700.1	524	530	G-box	CACGTC	involved in light responsiveness
TraesCS2D02G184700.1	592	598	G-box	CACGTC	involved in light responsiveness
TraesCS2D02G184700.1	669	675	G-box	CACGTC	involved in light responsiveness
TraesCS2D02G184700.1	733	739	G-box	CACGTC	involved in light responsiveness
TraesCS2D02G184700.1	991	997	G-box	CACGTC	involved in light responsiveness
TraesCS2D02G184700.1	994	1000	G-box	CACGTC	involved in light responsiveness
TraesCS2D02G184700.1	1137	1143	G-box	CACGTC	involved in light responsiveness
TraesCS2D02G184700.1	1245	1251	G-box	CACGTC	involved in light responsiveness
TraesCS2D02G184700.1	1326	1332	TGA-element	AACGAC	auxin-responsive element
TraesCS2D02G184700.1	669	675	ABRE3a	TACGTG	NO
TraesCS2D02G184700.1	310	316	MYC	CATGTG	NO
TraesCS2D02G184700.1	570	576	MYC	CATGTG	NO
TraesCS2D02G184700.1	340	346	Sp1	GGGCGG	light responsive element
TraesCS2D02G184700.1	1066	1072	Sp1	GGGCGG	light responsive element
TraesCS2D02G184700.1	739	745	GC-motif	CCCCCG	enhancer-like element involved in anoxic specific inducibility
TraesCS2D02G184700.1	775	781	GC-motif	CCCCCG	enhancer-like element involved in anoxic specific inducibility
TraesCS2D02G184700.1	14	18	TATA-box	TATAA/TATA/TACAAAA	core promoter element around -30 of transcription start
TraesCS2D02G184700.1	136	142	TATA-box	TATAA/TATA/TACAAAA	core promoter element around -30 of transcription start
TraesCS2D02G184700.1	137	142	TATA-box	TATAA/TATA/TACAAAA	core promoter element around -30 of transcription start
TraesCS2D02G184700.1	138	142	TATA-box	TATAA/TATA/TACAAAA	core promoter element around -30 of transcription start
TraesCS2D02G184700.1	295	300	TATA-box	TATAA/TATA/TACAAAA	core promoter element around -30 of transcription start
TraesCS2D02G184700.1	296	300	TATA-box	TATAA/TATA/TACAAAA	core promoter element around -30 of transcription start
TraesCS2D02G184700.1	437	443	ARE	AAACCA	cis-acting regulatory element essential for the anaerobic induction
TraesCS2D02G184700.1	655	661	ARE	AAACCA	cis-acting regulatory element essential for the anaerobic induction
TraesCS2D02G184700.1	541	550	ATCT-motif	AATCTAATCC	part of a conserved DNA module involved in light responsiveness
TraesCS2D02G184700.1	826	832	Myb	CAACTG	NO
TraesCS2D02G184700.1	669	675	ABRE4	CACGTA	NO
TraesCS2D02G232900.1	1317	1324	TCCC-motif	TCTCCCT	part of a light responsive element
TraesCS2D02G232900.1	1127	1133	Sp1	GGGCGG	light responsive element
TraesCS2D02G232900.1	1280	1286	Sp1	GGGCGG	light responsive element
TraesCS2D02G232900.1	1465	1471	Sp1	GGGCGG	light responsive element
TraesCS2D02G232900.1	172	178	MYC	CATGTG	NO
TraesCS2D02G232900.1	255	261	MYC	CATGTG	NO
TraesCS2D02G232900.1	745	751	MYC	CATGTG	NO
TraesCS2D02G232900.1	467	472	TATA-box	TATAA/TATA/TACAAAA	core promoter element around -30 of transcription start
TraesCS2D02G232900.1	468	472	TATA-box	TATAA/TATA/TACAAAA	core promoter element around -30 of transcription start
TraesCS2D02G232900.1	688	695	TATA-box	TATAA/TATA/TACAAAA	core promoter element around -30 of transcription start
TraesCS2D02G232900.1	922	928	TATA-box	TATAA/TATA/TACAAAA	core promoter element around -30 of transcription start
TraesCS2D02G232900.1	923	927	TATA-box	TATAA/TATA/TACAAAA	core promoter element around -30 of transcription start
TraesCS2D02G232900.1	1044	1049	TATA-box	TATAA/TATA/TACAAAA	core promoter element around -30 of transcription start
TraesCS2D02G232900.1	1045	1049	TATA-box	TATAA/TATA/TACAAAA	core promoter element around -30 of transcription start
TraesCS2D02G232900.1	1444	1450	GC-motif	CCCCCG	enhancer-like element involved in anoxic specific inducibility
TraesCS2D02G232900.1	672	679	P-box	CCTTTTG	gibberellin-responsive element
TraesCS2D02G232900.1	307	313	G-box	CACGTC	involved in light responsiveness
TraesCS2D02G232900.1	645	651	G-box	CACGTC	involved in light responsiveness
TraesCS2D02G232900.1	307	313	G-Box	CACGTC	involved in light responsiveness
TraesCS2D02G232900.1	1226	1232	LTR	CCGAAA	involved in low-temperature responsiveness
TraesCS2D02G232900.1	452	458	DRE core	GCCGAC	NO
TraesCS2D02G232900.1	831	837	DRE core	GCCGAC	NO
TraesCS2D02G232900.1	1122	1128	DRE core	GCCGAC	NO
TraesCS2D02G232900.1	1429	1435	DRE core	GCCGAC	NO
TraesCS2D02G232900.1	203	212	AAGAA-motif	GAAAGAA	NO
TraesCS2D02G232900.1	349	356	AAGAA-motif	GAAAGAA	NO
TraesCS2D02G232900.1	653	658	TGACG-motif	TGACG	cis-acting regulatory element involved in the MeJA-responsiveness
TraesCS2D02G232900.1	1264	1269	TGACG-motif	TGACG	cis-acting regulatory element involved in the MeJA-responsiveness
TraesCS2D02G232900.1	307	313	ABRE	ACGTG	involved in the abscisic acid responsiveness
TraesCS2D02G232900.1	308	313	ABRE	ACGTG	involved in the abscisic acid responsiveness
TraesCS2D02G232900.1	646	651	ABRE	ACGTG	involved in the abscisic acid responsiveness
TraesCS2D02G232900.1	572	578	WRE3	CCACCT	NO
TraesCS2D02G232900.1	584	590	MYB	CAACAG/CAACCA/TAACCA	NO
TraesCS2D02G232900.1	1139	1145	MYB	CAACAG/CAACCA/TAACCA	NO
TraesCS2D02G232900.1	271	276	STRE	AGGGG	NO
TraesCS2D02G232900.1	670	675	STRE	AGGGG	NO
TraesCS2D02G232900.1	1024	1029	STRE	AGGGG	NO
TraesCS2D02G232900.1	1313	1318	STRE	AGGGG	NO
TraesCS2D02G368800.1	948	955	GCN4_motif	TGAGTCA	involved in endosperm expression
TraesCS2D02G368800.1	204	209	TGACG-motif	TGACG	cis-acting regulatory element involved in the MeJA-responsiveness
TraesCS2D02G368800.1	766	771	TGACG-motif	TGACG	cis-acting regulatory element involved in the MeJA-responsiveness
TraesCS2D02G368800.1	1279	1286	AAGAA-motif	GAAAGAA	NO
TraesCS2D02G368800.1	225	230	STRE	AGGGG	NO
TraesCS2D02G368800.1	518	523	STRE	AGGGG	NO
TraesCS2D02G368800.1	1062	1067	STRE	AGGGG	NO
TraesCS2D02G368800.1	1173	1178	STRE	AGGGG	NO
TraesCS2D02G368800.1	1422	1427	STRE	AGGGG	NO
TraesCS2D02G368800.1	190	197	TATC-box	TATCCCA	cis-acting element involved in gibberellin-responsiveness
TraesCS2D02G368800.1	393	399	WRE3	CCACCT	NO
TraesCS2D02G368800.1	458	463	ABRE	ACGTG	involved in the abscisic acid responsiveness
TraesCS2D02G368800.1	1332	1337	ABRE	ACGTG	involved in the abscisic acid responsiveness
TraesCS2D02G368800.1	2	8	MYB	CAACAG/CAACCA/TAACCA	NO
TraesCS2D02G368800.1	186	192	MYB	CAACAG/CAACCA/TAACCA	NO
TraesCS2D02G368800.1	268	274	MYB	CAACAG/CAACCA/TAACCA	NO
TraesCS2D02G368800.1	397	403	MYB	CAACAG/CAACCA/TAACCA	NO
TraesCS2D02G368800.1	439	445	MYB	CAACAG/CAACCA/TAACCA	NO
TraesCS2D02G368800.1	944	950	MYB	CAACAG/CAACCA/TAACCA	NO
TraesCS2D02G368800.1	839	846	MRE	AACCTAA	MYB binding site involved in light responsiveness
TraesCS2D02G368800.1	269	276	GT1-motif	GGTTAAT/GGTTAA	light responsive element
TraesCS2D02G368800.1	856	862	GT1-motif	GGTTAAT/GGTTAA	light responsive element
TraesCS2D02G368800.1	523	529	ARE	AAACCA	cis-acting regulatory element essential for the anaerobic induction
TraesCS2D02G368800.1	1214	1221	TCCC-motif	TCTCCCT	part of a light responsive element
TraesCS2D02G368800.1	268	274	MYB-like sequence	TAACCA	NO
TraesCS2D02G368800.1	31	35	TATA-box	TATAA/TATA/TACAAAA	core promoter element around -30 of transcription start
TraesCS2D02G368800.1	59	65	TATA-box	TATAA/TATA/TACAAAA	core promoter element around -30 of transcription start
TraesCS2D02G368800.1	60	64	TATA-box	TATAA/TATA/TACAAAA	core promoter element around -30 of transcription start
TraesCS2D02G368800.1	143	149	TATA-box	TATAA/TATA/TACAAAA	core promoter element around -30 of transcription start
TraesCS2D02G368800.1	145	149	TATA-box	TATAA/TATA/TACAAAA	core promoter element around -30 of transcription start
TraesCS2D02G368800.1	663	669	TATA-box	TATAA/TATA/TACAAAA	core promoter element around -30 of transcription start
TraesCS2D02G368800.1	664	669	TATA-box	TATAA/TATA/TACAAAA	core promoter element around -30 of transcription start
TraesCS2D02G368800.1	665	669	TATA-box	TATAA/TATA/TACAAAA	core promoter element around -30 of transcription start
TraesCS2D02G368800.1	1027	1032	TATA-box	TATAA/TATA/TACAAAA	core promoter element around -30 of transcription start
TraesCS2D02G368800.1	1028	1032	TATA-box	TATAA/TATA/TACAAAA	core promoter element around -30 of transcription start
TraesCS2D02G368800.1	1232	1238	TATA-box	TATAA/TATA/TACAAAA	core promoter element around -30 of transcription start
TraesCS2D02G368800.1	1233	1239	TATA-box	TATAA/TATA/TACAAAA	core promoter element around -30 of transcription start
TraesCS2D02G368800.1	1235	1239	TATA-box	TATAA/TATA/TACAAAA	core promoter element around -30 of transcription start
TraesCS2D02G368800.1	1316	1322	TATA-box	TATAA/TATA/TACAAAA	core promoter element around -30 of transcription start
TraesCS2D02G368800.1	1317	1322	TATA-box	TATAA/TATA/TACAAAA	core promoter element around -30 of transcription start
TraesCS2D02G368800.1	1318	1322	TATA-box	TATAA/TATA/TACAAAA	core promoter element around -30 of transcription start
TraesCS2D02G368800.1	170	176	MYC	CATGTG	NO
TraesCS2D02G368800.1	1012	1018	MYC	CATGTG	NO
TraesCS2D02G368800.1	781	790	GATA-motif	AAGGATAAGG	part of a light responsive element
TraesCS2D02G368800.1	314	321	P-box	CCTTTTG	gibberellin-responsive element
TraesCS2D02G368800.1	1	8	GARE-motif	TCTGTTG	gibberellin-responsive element
TraesCS2D02G368800.1	1344	1352	ERE	ATTTTAAA	NO
TraesCS2D02G368800.1	457	463	G-Box	CACGTC	involved in light responsiveness
TraesCS2D02G368800.1	1332	1338	G-Box	CACGTC	involved in light responsiveness
TraesCS2D02G368800.1	1233	1239	AT~TATA-box	TATATA	NO
TraesCS2D02G368800.1	2	8	Myb-binding site	CAACAG	NO
TraesCS2D02G368800.1	397	403	Myb-binding site	CAACAG	NO
TraesCS2D02G368800.1	944	950	Myb-binding site	CAACAG	NO
TraesCS2D02G368800.1	365	371	TGA-element	AACGAC	auxin-responsive element
TraesCS2D02G479100.2	76	85	I-box	GTATAAGGCC	part of a light responsive element
TraesCS2D02G479100.2	972	978	AT~TATA-box	TATATA	NO
TraesCS2D02G479100.2	1060	1067	DRE1	ACCGAGA	NO
TraesCS2D02G479100.2	345	351	Myb-binding site	CAACAG	NO
TraesCS2D02G479100.2	224	230	TGA-element	AACGAC	auxin-responsive element
TraesCS2D02G479100.2	60	66	G-box	CACGTC	involved in light responsiveness
TraesCS2D02G479100.2	158	164	G-box	CACGTC	involved in light responsiveness
TraesCS2D02G479100.2	175	181	G-box	CACGTC	involved in light responsiveness
TraesCS2D02G479100.2	257	263	G-box	CACGTC	involved in light responsiveness
TraesCS2D02G479100.2	379	385	G-box	CACGTC	involved in light responsiveness
TraesCS2D02G479100.2	603	609	G-box	CACGTC	involved in light responsiveness
TraesCS2D02G479100.2	822	831	G-box	CACGTC	involved in light responsiveness
TraesCS2D02G479100.2	1279	1285	G-box	CACGTC	involved in light responsiveness
TraesCS2D02G479100.2	521	529	re2f-1	GCGGGAAA	NO
TraesCS2D02G479100.2	1206	1212	ARE	AAACCA	cis-acting regulatory element essential for the anaerobic induction
TraesCS2D02G479100.2	321	327	Myb	CAACTG	NO
TraesCS2D02G479100.2	949	960	AAAC-motif	CAATCAAAACCT	light responsive element
TraesCS2D02G479100.2	460	466	GC-motif	CCCCCG	enhancer-like element involved in anoxic specific inducibility
TraesCS2D02G479100.2	640	646	GC-motif	CCCCCG	enhancer-like element involved in anoxic specific inducibility
TraesCS2D02G479100.2	774	780	GC-motif	CCCCCG	enhancer-like element involved in anoxic specific inducibility
TraesCS2D02G479100.2	1051	1057	GC-motif	CCCCCG	enhancer-like element involved in anoxic specific inducibility
TraesCS2D02G479100.2	972	978	TATA-box	TATAA/TATA/TACAAAA	core promoter element around -30 of transcription start
TraesCS2D02G479100.2	974	978	TATA-box	TATAA/TATA/TACAAAA	core promoter element around -30 of transcription start
TraesCS2D02G479100.2	1338	1344	TATA-box	TATAA/TATA/TACAAAA	core promoter element around -30 of transcription start
TraesCS2D02G479100.2	1339	1344	TATA-box	TATAA/TATA/TACAAAA	core promoter element around -30 of transcription start
TraesCS2D02G479100.2	1340	1344	TATA-box	TATAA/TATA/TACAAAA	core promoter element around -30 of transcription start
TraesCS2D02G479100.2	1332	1338	MYC	CATGTG	NO
TraesCS2D02G479100.2	1351	1357	MYC	CATGTG	NO
TraesCS2D02G479100.2	14	20	Sp1	GGGCGG	light responsive element
TraesCS2D02G479100.2	668	674	Sp1	GGGCGG	light responsive element
TraesCS2D02G479100.2	689	695	Sp1	GGGCGG	light responsive element
TraesCS2D02G479100.2	693	699	Sp1	GGGCGG	light responsive element
TraesCS2D02G479100.2	697	703	Sp1	GGGCGG	light responsive element
TraesCS2D02G479100.2	798	804	Sp1	GGGCGG	light responsive element
TraesCS2D02G479100.2	805	811	Sp1	GGGCGG	light responsive element
TraesCS2D02G479100.2	828	834	Sp1	GGGCGG	light responsive element
TraesCS2D02G479100.2	136	141	STRE	AGGGG	NO
TraesCS2D02G479100.2	589	594	STRE	AGGGG	NO
TraesCS2D02G479100.2	700	705	STRE	AGGGG	NO
TraesCS2D02G479100.2	712	717	STRE	AGGGG	NO
TraesCS2D02G479100.2	759	764	STRE	AGGGG	NO
TraesCS2D02G479100.2	1318	1324	WRE3	CCACCT	NO
TraesCS2D02G479100.2	158	163	ABRE	ACGTG	involved in the abscisic acid responsiveness
TraesCS2D02G479100.2	345	351	MYB	CAACAG/CAACCA/TAACCA	NO
TraesCS2D02G479100.2	395	401	MYB	CAACAG/CAACCA/TAACCA	NO
TraesCS2D02G479100.2	399	405	MYB recognition site	CCGTTG	NO
TraesCS2D02G479100.2	752	758	MYB recognition site	CCGTTG	NO
TraesCS2D02G479100.2	1449	1455	MYB recognition site	CCGTTG	NO
TraesCS2D02G479100.2	542	548	DRE core	GCCGAC	NO
TraesCS2D02G479100.2	388	393	TGACG-motif	TGACG	cis-acting regulatory element involved in the MeJA-responsiveness
TraesCS2D02G479100.2	904	909	TGACG-motif	TGACG	cis-acting regulatory element involved in the MeJA-responsiveness
TraesCS2D02G479100.2	321	327	MBS	CAACTG	MYB binding site involved in drought-inducibility
TraesCS2D02G547100.1	177	182	TGACG-motif	TGACG	cis-acting regulatory element involved in the MeJA-responsiveness
TraesCS2D02G547100.1	643	649	MBS	CAACTG	MYB binding site involved in drought-inducibility
TraesCS2D02G547100.1	930	936	DRE core	GCCGAC	NO
TraesCS2D02G547100.1	617	623	LTR	CCGAAA	involved in low-temperature responsiveness
TraesCS2D02G547100.1	40	47	MRE	AACCTAA	MYB binding site involved in light responsiveness
TraesCS2D02G547100.1	601	606	STRE	AGGGG	NO
TraesCS2D02G547100.1	688	693	STRE	AGGGG	NO
TraesCS2D02G547100.1	799	804	STRE	AGGGG	NO
TraesCS2D02G547100.1	840	845	STRE	AGGGG	NO
TraesCS2D02G547100.1	992	998	WRE3	CCACCT	NO
TraesCS2D02G547100.1	175	180	ABRE	ACGTG	involved in the abscisic acid responsiveness
TraesCS2D02G547100.1	6	12	MYB	CAACAG/CAACCA/TAACCA	NO
TraesCS2D02G547100.1	284	290	MYB	CAACAG/CAACCA/TAACCA	NO
TraesCS2D02G547100.1	327	333	MYB	CAACAG/CAACCA/TAACCA	NO
TraesCS2D02G547100.1	1265	1271	MYB	CAACAG/CAACCA/TAACCA	NO
TraesCS2D02G547100.1	1411	1417	MYB	CAACAG/CAACCA/TAACCA	NO
TraesCS2D02G547100.1	6	12	MYB-like sequence	TAACCA	NO
TraesCS2D02G547100.1	393	397	TATA-box	TATAA/TATA/TACAAAA	core promoter element around -30 of transcription start
TraesCS2D02G547100.1	605	611	TATA-box	TATAA/TATA/TACAAAA	core promoter element around -30 of transcription start
TraesCS2D02G547100.1	607	611	TATA-box	TATAA/TATA/TACAAAA	core promoter element around -30 of transcription start
TraesCS2D02G547100.1	1250	1257	TATA-box	TATAA/TATA/TACAAAA	core promoter element around -30 of transcription start
TraesCS2D02G547100.1	1334	1340	TATA-box	TATAA/TATA/TACAAAA	core promoter element around -30 of transcription start
TraesCS2D02G547100.1	1335	1342	TATA-box	TATAA/TATA/TACAAAA	core promoter element around -30 of transcription start
TraesCS2D02G547100.1	1336	1342	TATA-box	TATAA/TATA/TACAAAA	core promoter element around -30 of transcription start
TraesCS2D02G547100.1	1338	1342	TATA-box	TATAA/TATA/TACAAAA	core promoter element around -30 of transcription start
TraesCS2D02G547100.1	1377	1383	TATA-box	TATAA/TATA/TACAAAA	core promoter element around -30 of transcription start
TraesCS2D02G547100.1	1379	1383	TATA-box	TATAA/TATA/TACAAAA	core promoter element around -30 of transcription start
TraesCS2D02G547100.1	849	855	GC-motif	CCCCCG	enhancer-like element involved in anoxic specific inducibility
TraesCS2D02G547100.1	229	235	MYC	CATGTG	NO
TraesCS2D02G547100.1	437	443	MYC	CATGTG	NO
TraesCS2D02G547100.1	450	456	MYC	CATGTG	NO
TraesCS2D02G547100.1	499	505	MYC	CATGTG	NO
TraesCS2D02G547100.1	570	576	MYC	CATGTG	NO
TraesCS2D02G547100.1	852	858	Sp1	GGGCGG	light responsive element
TraesCS2D02G547100.1	1456	1462	ARE	AAACCA	cis-acting regulatory element essential for the anaerobic induction
TraesCS2D02G547100.1	81	87	Myb	CAACTG	NO
TraesCS2D02G547100.1	643	649	Myb	CAACTG	NO
TraesCS2D02G547100.1	200	208	ERE	ATTTTAAA	NO
TraesCS2D02G547100.1	1336	1342	AT~TATA-box	TATATA	NO
TraesCS2D02G547100.1	1265	1271	Myb-binding site	CAACAG	NO
TraesCS2D02G547100.1	175	181	G-box	CACGTC	involved in light responsiveness
TraesCS2D02G547100.1	671	677	G-box	CACGTC	involved in light responsiveness
TraesCS2D02G547100.1	682	688	G-box	CACGTC	involved in light responsiveness
TraesCS2D02G547100.1	717	723	G-box	CACGTC	involved in light responsiveness
TraesCS2D02G547100.1	724	730	G-box	CACGTC	involved in light responsiveness
TraesCS2D02G547100.1	1001	1007	TGA-element	AACGAC	auxin-responsive element
TraesCS2D02G547300.1	597	604	AAGAA-motif	GAAAGAA	NO
TraesCS2D02G547300.1	745	752	AAGAA-motif	GAAAGAA	NO
TraesCS2D02G547300.1	1000	1007	AAGAA-motif	GAAAGAA	NO
TraesCS2D02G547300.1	1236	1241	TGACG-motif	TGACG	cis-acting regulatory element involved in the MeJA-responsiveness
TraesCS2D02G547300.1	1345	1351	MBS	CAACTG	MYB binding site involved in drought-inducibility
TraesCS2D02G547300.1	203	208	STRE	AGGGG	NO
TraesCS2D02G547300.1	1206	1211	STRE	AGGGG	NO
TraesCS2D02G547300.1	1387	1392	STRE	AGGGG	NO
TraesCS2D02G547300.1	1050	1057	ABRE	ACGTG	involved in the abscisic acid responsiveness
TraesCS2D02G547300.1	502	508	MYB	CAACAG/CAACCA/TAACCA	NO
TraesCS2D02G547300.1	1103	1109	MYB	CAACAG/CAACCA/TAACCA	NO
TraesCS2D02G547300.1	1125	1131	MYB	CAACAG/CAACCA/TAACCA	NO
TraesCS2D02G547300.1	1294	1300	MYB recognition site	CCGTTG	NO
TraesCS2D02G547300.1	1294	1304	NON	CAACGGCCACG	NO
TraesCS2D02G547300.1	1320	1327	GT1-motif	GGTTAAT/GGTTAA	light responsive element
TraesCS2D02G547300.1	143	149	ARE	AAACCA	cis-acting regulatory element essential for the anaerobic induction
TraesCS2D02G547300.1	821	827	ARE	AAACCA	cis-acting regulatory element essential for the anaerobic induction
TraesCS2D02G547300.1	874	880	Myb	CAACTG	NO
TraesCS2D02G547300.1	1223	1229	Myb	CAACTG	NO
TraesCS2D02G547300.1	1345	1351	Myb	CAACTG	NO
TraesCS2D02G547300.1	78	84	TATA-box	TATAA/TATA/TACAAAA	core promoter element around -30 of transcription start
TraesCS2D02G547300.1	79	85	TATA-box	TATAA/TATA/TACAAAA	core promoter element around -30 of transcription start
TraesCS2D02G547300.1	80	84	TATA-box	TATAA/TATA/TACAAAA	core promoter element around -30 of transcription start
TraesCS2D02G547300.1	291	297	TATA-box	TATAA/TATA/TACAAAA	core promoter element around -30 of transcription start
TraesCS2D02G547300.1	292	298	TATA-box	TATAA/TATA/TACAAAA	core promoter element around -30 of transcription start
TraesCS2D02G547300.1	293	299	TATA-box	TATAA/TATA/TACAAAA	core promoter element around -30 of transcription start
TraesCS2D02G547300.1	294	298	TATA-box	TATAA/TATA/TACAAAA	core promoter element around -30 of transcription start
TraesCS2D02G547300.1	319	325	TATA-box	TATAA/TATA/TACAAAA	core promoter element around -30 of transcription start
TraesCS2D02G547300.1	320	324	TATA-box	TATAA/TATA/TACAAAA	core promoter element around -30 of transcription start
TraesCS2D02G547300.1	413	420	TATA-box	TATAA/TATA/TACAAAA	core promoter element around -30 of transcription start
TraesCS2D02G547300.1	414	420	TATA-box	TATAA/TATA/TACAAAA	core promoter element around -30 of transcription start
TraesCS2D02G547300.1	415	420	TATA-box	TATAA/TATA/TACAAAA	core promoter element around -30 of transcription start
TraesCS2D02G547300.1	416	420	TATA-box	TATAA/TATA/TACAAAA	core promoter element around -30 of transcription start
TraesCS2D02G547300.1	673	680	TATA-box	TATAA/TATA/TACAAAA	core promoter element around -30 of transcription start
TraesCS2D02G547300.1	674	680	TATA-box	TATAA/TATA/TACAAAA	core promoter element around -30 of transcription start
TraesCS2D02G547300.1	675	680	TATA-box	TATAA/TATA/TACAAAA	core promoter element around -30 of transcription start
TraesCS2D02G547300.1	676	680	TATA-box	TATAA/TATA/TACAAAA	core promoter element around -30 of transcription start
TraesCS2D02G547300.1	739	743	TATA-box	TATAA/TATA/TACAAAA	core promoter element around -30 of transcription start
TraesCS2D02G547300.1	1226	1231	TATA-box	TATAA/TATA/TACAAAA	core promoter element around -30 of transcription start
TraesCS2D02G547300.1	1227	1231	TATA-box	TATAA/TATA/TACAAAA	core promoter element around -30 of transcription start
TraesCS2D02G547300.1	1230	1236	TATA-box	TATAA/TATA/TACAAAA	core promoter element around -30 of transcription start
TraesCS2D02G547300.1	1231	1236	TATA-box	TATAA/TATA/TACAAAA	core promoter element around -30 of transcription start
TraesCS2D02G547300.1	1232	1236	TATA-box	TATAA/TATA/TACAAAA	core promoter element around -30 of transcription start
TraesCS2D02G547300.1	467	473	MYC	CATGTG	NO
TraesCS2D02G547300.1	582	588	MYC	CATGTG	NO
TraesCS2D02G547300.1	1107	1113	MYC	CATGTG	NO
TraesCS2D02G547300.1	1129	1135	MYC	CATGTG	NO
TraesCS2D02G547300.1	1184	1190	W box	TTGACC	NO
TraesCS2D02G547300.1	1053	1060	AuxRR-core	GGTCCAT	involved in auxin responsiveness
TraesCS2D02G547300.1	599	608	WUN-motif	AAATTTCCT	wound-responsive element
TraesCS2D02G547300.1	407	415	ERE	ATTTTAAA	NO
TraesCS2D02G547300.1	78	84	AT~TATA-box	TATATA	NO
TraesCS2D02G547300.1	292	298	AT~TATA-box	TATATA	NO
TraesCS3A02G095400.1	998	1004	DRE core	GCCGAC	NO
TraesCS3A02G095400.1	1420	1426	DRE core	GCCGAC	NO
TraesCS3A02G095400.1	1486	1492	DRE core	GCCGAC	NO
TraesCS3A02G095400.1	522	527	TGACG-motif	TGACG	cis-acting regulatory element involved in the MeJA-responsiveness
TraesCS3A02G095400.1	663	668	TGACG-motif	TGACG	cis-acting regulatory element involved in the MeJA-responsiveness
TraesCS3A02G095400.1	739	744	TGACG-motif	TGACG	cis-acting regulatory element involved in the MeJA-responsiveness
TraesCS3A02G095400.1	1140	1145	TGACG-motif	TGACG	cis-acting regulatory element involved in the MeJA-responsiveness
TraesCS3A02G095400.1	796	802	MYB recognition site	CCGTTG	NO
TraesCS3A02G095400.1	310	316	MYB	CAACAG/CAACCA/TAACCA	NO
TraesCS3A02G095400.1	612	618	MYB	CAACAG/CAACCA/TAACCA	NO
TraesCS3A02G095400.1	1075	1081	MYB	CAACAG/CAACCA/TAACCA	NO
TraesCS3A02G095400.1	317	323	WRE3	CCACCT	NO
TraesCS3A02G095400.1	530	536	WRE3	CCACCT	NO
TraesCS3A02G095400.1	1138	1143	ABRE	ACGTG	involved in the abscisic acid responsiveness
TraesCS3A02G095400.1	1478	1487	ABRE	ACGTG	involved in the abscisic acid responsiveness
TraesCS3A02G095400.1	1260	1267	TATC-box	TATCCCA	cis-acting element involved in gibberellin-responsiveness
TraesCS3A02G095400.1	1354	1359	STRE	AGGGG	NO
TraesCS3A02G095400.1	1452	1457	STRE	AGGGG	NO
TraesCS3A02G095400.1	1337	1347	NON	CAACGGCCACG	NO
TraesCS3A02G095400.1	217	223	Myb	CAACTG	NO
TraesCS3A02G095400.1	1209	1216	TCCC-motif	TCTCCCT	part of a light responsive element
TraesCS3A02G095400.1	32	38	ARE	AAACCA	cis-acting regulatory element essential for the anaerobic induction
TraesCS3A02G095400.1	305	311	ARE	AAACCA	cis-acting regulatory element essential for the anaerobic induction
TraesCS3A02G095400.1	1267	1273	ARE	AAACCA	cis-acting regulatory element essential for the anaerobic induction
TraesCS3A02G095400.1	809	817	re2f-1	GCGGGAAA	NO
TraesCS3A02G095400.1	13	19	W box	TTGACC	NO
TraesCS3A02G095400.1	598	604	Sp1	GGGCGG	light responsive element
TraesCS3A02G095400.1	684	690	Sp1	GGGCGG	light responsive element
TraesCS3A02G095400.1	1168	1174	Sp1	GGGCGG	light responsive element
TraesCS3A02G095400.1	1402	1408	Sp1	GGGCGG	light responsive element
TraesCS3A02G095400.1	1426	1432	Sp1	GGGCGG	light responsive element
TraesCS3A02G095400.1	579	585	MYC	CATGTG	NO
TraesCS3A02G095400.1	1048	1054	MYC	CATGTG	NO
TraesCS3A02G095400.1	1066	1072	MYC	CATGTG	NO
TraesCS3A02G095400.1	1399	1405	GC-motif	CCCCCG	enhancer-like element involved in anoxic specific inducibility
TraesCS3A02G095400.1	22	28	TATA-box	TATAA/TATA/TACAAAA	core promoter element around -30 of transcription start
TraesCS3A02G095400.1	23	28	TATA-box	TATAA/TATA/TACAAAA	core promoter element around -30 of transcription start
TraesCS3A02G095400.1	24	28	TATA-box	TATAA/TATA/TACAAAA	core promoter element around -30 of transcription start
TraesCS3A02G095400.1	104	111	TATA-box	TATAA/TATA/TACAAAA	core promoter element around -30 of transcription start
TraesCS3A02G095400.1	313	318	TATA-box	TATAA/TATA/TACAAAA	core promoter element around -30 of transcription start
TraesCS3A02G095400.1	314	318	TATA-box	TATAA/TATA/TACAAAA	core promoter element around -30 of transcription start
TraesCS3A02G095400.1	415	421	TATA-box	TATAA/TATA/TACAAAA	core promoter element around -30 of transcription start
TraesCS3A02G095400.1	416	421	TATA-box	TATAA/TATA/TACAAAA	core promoter element around -30 of transcription start
TraesCS3A02G095400.1	417	421	TATA-box	TATAA/TATA/TACAAAA	core promoter element around -30 of transcription start
TraesCS3A02G095400.1	804	810	TATA-box	TATAA/TATA/TACAAAA	core promoter element around -30 of transcription start
TraesCS3A02G095400.1	805	809	TATA-box	TATAA/TATA/TACAAAA	core promoter element around -30 of transcription start
TraesCS3A02G095400.1	310	316	MYB-like sequence	TAACCA	NO
TraesCS3A02G095400.1	1138	1144	G-box	CACGTC	involved in light responsiveness
TraesCS3A02G095400.1	24	32	TATA	TATAAAAT	NO
TraesCS3A02G095400.1	189	197	ERE	ATTTTAAA	NO
TraesCS3A02G095400.1	191	199	ERE	ATTTTAAA	NO
TraesCS3A02G140000.1	426	432	MYB-like sequence	TAACCA	NO
TraesCS3A02G140000.1	617	623	MYB-like sequence	TAACCA	NO
TraesCS3A02G140000.1	662	668	MYB-like sequence	TAACCA	NO
TraesCS3A02G140000.1	705	711	MYB-like sequence	TAACCA	NO
TraesCS3A02G140000.1	109	116	TATA-box	TATAA/TATA/TACAAAA	core promoter element around -30 of transcription start
TraesCS3A02G140000.1	110	116	TATA-box	TATAA/TATA/TACAAAA	core promoter element around -30 of transcription start
TraesCS3A02G140000.1	111	116	TATA-box	TATAA/TATA/TACAAAA	core promoter element around -30 of transcription start
TraesCS3A02G140000.1	112	116	TATA-box	TATAA/TATA/TACAAAA	core promoter element around -30 of transcription start
TraesCS3A02G140000.1	520	527	TATA-box	TATAA/TATA/TACAAAA	core promoter element around -30 of transcription start
TraesCS3A02G140000.1	660	664	TATA-box	TATAA/TATA/TACAAAA	core promoter element around -30 of transcription start
TraesCS3A02G140000.1	947	953	TATA-box	TATAA/TATA/TACAAAA	core promoter element around -30 of transcription start
TraesCS3A02G140000.1	949	953	TATA-box	TATAA/TATA/TACAAAA	core promoter element around -30 of transcription start
TraesCS3A02G140000.1	1322	1328	TATA-box	TATAA/TATA/TACAAAA	core promoter element around -30 of transcription start
TraesCS3A02G140000.1	1324	1328	TATA-box	TATAA/TATA/TACAAAA	core promoter element around -30 of transcription start
TraesCS3A02G140000.1	24	30	MYC	CATGTG	NO
TraesCS3A02G140000.1	146	152	MYC	CATGTG	NO
TraesCS3A02G140000.1	148	154	MYC	CATGTG	NO
TraesCS3A02G140000.1	297	303	MYC	CATGTG	NO
TraesCS3A02G140000.1	1214	1220	MYC	CATGTG	NO
TraesCS3A02G140000.1	1234	1240	MYC	CATGTG	NO
TraesCS3A02G140000.1	1401	1407	MYC	CATGTG	NO
TraesCS3A02G140000.1	49	55	ABRE4	CACGTA	NO
TraesCS3A02G140000.1	195	201	ABRE4	CACGTA	NO
TraesCS3A02G140000.1	1326	1332	ABRE4	CACGTA	NO
TraesCS3A02G140000.1	61	67	ARE	AAACCA	cis-acting regulatory element essential for the anaerobic induction
TraesCS3A02G140000.1	263	269	ARE	AAACCA	cis-acting regulatory element essential for the anaerobic induction
TraesCS3A02G140000.1	1137	1143	ARE	AAACCA	cis-acting regulatory element essential for the anaerobic induction
TraesCS3A02G140000.1	1407	1413	Myb	CAACTG	NO
TraesCS3A02G140000.1	270	279	WUN-motif	AAATTTCCT	wound-responsive element
TraesCS3A02G140000.1	337	346	WUN-motif	AAATTTCCT	wound-responsive element
TraesCS3A02G140000.1	108	116	TATA	TATAAAAT	NO
TraesCS3A02G140000.1	233	239	TGA-element	AACGAC	auxin-responsive element
TraesCS3A02G140000.1	49	55	G-box	CACGTC	involved in light responsiveness
TraesCS3A02G140000.1	194	202	G-box	CACGTC	involved in light responsiveness
TraesCS3A02G140000.1	195	201	G-box	CACGTC	involved in light responsiveness
TraesCS3A02G140000.1	224	230	G-box	CACGTC	involved in light responsiveness
TraesCS3A02G140000.1	384	390	G-box	CACGTC	involved in light responsiveness
TraesCS3A02G140000.1	1089	1095	G-box	CACGTC	involved in light responsiveness
TraesCS3A02G140000.1	1326	1332	G-box	CACGTC	involved in light responsiveness
TraesCS3A02G140000.1	49	55	ABRE3a	TACGTG	NO
TraesCS3A02G140000.1	195	201	ABRE3a	TACGTG	NO
TraesCS3A02G140000.1	1326	1332	ABRE3a	TACGTG	NO
TraesCS3A02G140000.1	1226	1231	TGACG-motif	TGACG	cis-acting regulatory element involved in the MeJA-responsiveness
TraesCS3A02G140000.1	1407	1413	MBS	CAACTG	MYB binding site involved in drought-inducibility
TraesCS3A02G140000.1	1113	1119	LTR	CCGAAA	involved in low-temperature responsiveness
TraesCS3A02G140000.1	175	181	TCT-motif	TCTTAC	part of a light responsive element
TraesCS3A02G140000.1	616	622	GT1-motif	GGTTAAT/GGTTAA	light responsive element
TraesCS3A02G140000.1	180	185	STRE	AGGGG	NO
TraesCS3A02G140000.1	899	904	STRE	AGGGG	NO
TraesCS3A02G140000.1	64	70	WRE3	CCACCT	NO
TraesCS3A02G140000.1	710	716	WRE3	CCACCT	NO
TraesCS3A02G140000.1	50	55	ABRE	ACGTG	involved in the abscisic acid responsiveness
TraesCS3A02G140000.1	196	201	ABRE	ACGTG	involved in the abscisic acid responsiveness
TraesCS3A02G140000.1	385	390	ABRE	ACGTG	involved in the abscisic acid responsiveness
TraesCS3A02G140000.1	1327	1332	ABRE	ACGTG	involved in the abscisic acid responsiveness
TraesCS3A02G140000.1	426	432	MYB	CAACAG/CAACCA/TAACCA	NO
TraesCS3A02G140000.1	617	623	MYB	CAACAG/CAACCA/TAACCA	NO
TraesCS3A02G140000.1	625	631	MYB	CAACAG/CAACCA/TAACCA	NO
TraesCS3A02G140000.1	662	668	MYB	CAACAG/CAACCA/TAACCA	NO
TraesCS3A02G140000.1	696	702	MYB	CAACAG/CAACCA/TAACCA	NO
TraesCS3A02G140000.1	705	711	MYB	CAACAG/CAACCA/TAACCA	NO
TraesCS3A02G140000.1	1026	1032	MYB	CAACAG/CAACCA/TAACCA	NO
TraesCS3A02G260500.1	390	396	G-box	CACGTC	involved in light responsiveness
TraesCS3A02G260500.1	1274	1280	G-box	CACGTC	involved in light responsiveness
TraesCS3A02G260500.1	41	47	Myb-binding site	CAACAG	NO
TraesCS3A02G260500.1	856	863	P-box	CCTTTTG	gibberellin-responsive element
TraesCS3A02G260500.1	311	319	TATA-box	TATAA/TATA/TACAAAA	core promoter element around -30 of transcription start
TraesCS3A02G260500.1	870	875	TATA-box	TATAA/TATA/TACAAAA	core promoter element around -30 of transcription start
TraesCS3A02G260500.1	871	875	TATA-box	TATAA/TATA/TACAAAA	core promoter element around -30 of transcription start
TraesCS3A02G260500.1	1331	1335	TATA-box	TATAA/TATA/TACAAAA	core promoter element around -30 of transcription start
TraesCS3A02G260500.1	581	588	GATA-motif	AAGGATAAGG	part of a light responsive element
TraesCS3A02G260500.1	647	654	GATA-motif	AAGGATAAGG	part of a light responsive element
TraesCS3A02G260500.1	1405	1411	Sp1	GGGCGG	light responsive element
TraesCS3A02G260500.1	1409	1415	Sp1	GGGCGG	light responsive element
TraesCS3A02G260500.1	341	347	MYC	CATGTG	NO
TraesCS3A02G260500.1	1088	1094	MYC	CATGTG	NO
TraesCS3A02G260500.1	1128	1134	MYC	CATGTG	NO
TraesCS3A02G260500.1	1151	1157	MYC	CATGTG	NO
TraesCS3A02G260500.1	1169	1175	W box	TTGACC	NO
TraesCS3A02G260500.1	1065	1071	ARE	AAACCA	cis-acting regulatory element essential for the anaerobic induction
TraesCS3A02G260500.1	1197	1203	ARE	AAACCA	cis-acting regulatory element essential for the anaerobic induction
TraesCS3A02G260500.1	710	715	STRE	AGGGG	NO
TraesCS3A02G260500.1	943	948	STRE	AGGGG	NO
TraesCS3A02G260500.1	949	954	STRE	AGGGG	NO
TraesCS3A02G260500.1	1225	1230	STRE	AGGGG	NO
TraesCS3A02G260500.1	1322	1327	STRE	AGGGG	NO
TraesCS3A02G260500.1	1385	1390	STRE	AGGGG	NO
TraesCS3A02G260500.1	41	47	MYB	CAACAG/CAACCA/TAACCA	NO
[truncated: 4,629 more rows]

## Sheet: Sheet2
ID	3-AF1	3-AF3	AAAC-motif	AAGAA-motif	ABRE	ABRE2	ABRE3a	ABRE4	ARE	AT1-motif	ATC-motif	ATCT-motif	AT-ABRE	AT-TATA-box	AuxRE	AuxRR-core	CARE	DRE	DRE1	E2Fb	ERE	Gap-box	G-Box	G-box	GA-motif	GARE-motif	GATA-motif	GATT-motif	GC-motif	GC-repeat	GCN4-motif	GT1-motif	GTGGC-motif	HD-Zip	I-box	JERE	L-box	LAMP-element	LTR	MBS	MBSI	MRE	MSA-Like	MYB	Myb	MYC	MYB-Like	Myb-binding	Myc
TraesCS1A02G112600.1									1									1			2					1						2								1				5	1	2	2	1
TraesCS1A02G137400.1					1				1							1		1						1									1													4
TraesCS1A02G198000.1					1													1						2		2													2	1				4	1	5	2	3
TraesCS1A02G263800.1					12		3	3	2							1							5	8			1				1									4				3	4	8	1
TraesCS1A02G296100.1									1																				1															5	2	2		2
TraesCS1B02G118800.1					1					1				2							1			3		1						2							2	1		1		2	1	4	1	1
TraesCS1B02G132800.1				1	1													1						1	1	2						1								1				6	1	3	1	3
TraesCS1B02G152000.1					2				4					3				1						3								3			1			1						1		2	1
TraesCS1B02G212700.1				1	1		1	1				1						1						1								2										1		3	1	1	1
TraesCS1B02G274400.1				1	2		1	1			1			1		2		1						3			2												2					4		1	1	1
TraesCS1B02G284000.1				1	3									1				1		1			2	2			2		2			1								1	1			4	1	4	2
TraesCS1B02G304900.1					1													1						2					1						1									2		1		1
TraesCS1D02G010300.1					4		1	1	1									6		1				4					2						1					2				1	2	1	3
TraesCS1D02G099500.1					4				3									1			1		2	3		1			3			1							2			1		3	2	2	1	1
TraesCS1D02G114200.1																		1						1	1	2														2				5	2	2	2	3
TraesCS1D02G133300.1					2									1				1					2				1																	2		4	4
TraesCS1D02G201500.1					5		2	2	2														3	3									1						1					1		5
TraesCS1D02G263900.1				1	2		1	1						2		2								3			1																	1	1	1	1
TraesCS1D02G296100.1																					1								2			1								1				2	2	3		1
TraesCS2A02G145200.1					2				2					1				1			1			1					2						1				1	1					1	3
TraesCS2A02G178500.1					4		1	1	1					1									2	3					1										1	1					1
TraesCS2A02G232200.1					1											2		4	1					2					3			1							2					4		3	4	1
TraesCS2A02G372600.1				1	2				2					1							1		2								1											1		4		3	1	1
TraesCS2A02G479900.1					2				2					2				2						3			1		2			1		1					1		1			3		2	4
TraesCS2A02G526800.1				1	3		1	1	1					2			1	3					1	2					1			1							1					1	3	1	1	1
TraesCS2A02G545900.1														4				2			1	1		5			1		2										1	1		1		3	3	7	1	1
TraesCS2B02G144500.1					6		1	1	2									2					2	5					2					1						2				1	2		1	1
TraesCS2B02G170200.1				1	3				1														1	2															1	1				3	1
TraesCS2B02G250800.1									1									2											1										1	2			1		2	4
TraesCS2B02G389600.1					1				3					2									1								1	1								1				8	1	4	2	4
TraesCS2B02G504600.1					2				1									2					1	3					3																		1
TraesCS2B02G576800.1					5									4				2			1		1	7					1										1	2				3	3	10	1	1
TraesCS2D02G125100.1				1	4		1	1								1							1	4			1				1	1							1					2	1	6	2
TraesCS2D02G148900.1					2				1					2		1		1						2					2		1				1				2	1	1			1	2	2	1	1
TraesCS2D02G184700.1					9		1	1	2			1						1						13					2											1			1	1	1	2		1
TraesCS2D02G232900.1				2	3													4					1	2					1										1					2		3
TraesCS2D02G368800.1					2				1					1							1		2			1	1				1	2										1		6		2	1	3
TraesCS2D02G479100.2			1	1	1				1					1				1	1					8					4						1					1				2	1	2	3	1
TraesCS2D02G547100.1					1				1					1				1			1			5					1										1	1		1		5	2	4	1	1
TraesCS2D02G547300.1				3	1				2					2		1					1											1								1				3	3	4	1
TraesCS3A02G095400.1					2				3									3			2			1					1															3	1	3	2
TraesCS3A02G140000.1					4		3	3	3															7								1							1	1				7	1	7	4
TraesCS3A02G260500.1				2	2				2									1						2			2																	1		4		1
TraesCS3A02G288900.1				1	2				5									1					1	3			1		1						1				1	1				2	2	5	1
TraesCS3A02G350000.1					2		1	1	1								1				1		1	1			1		1			1														1
TraesCS3A02G369300.1				1	2				4					3	1								2																	1				3	1	4
TraesCS3A02G377100.1				1	2				3					1				1		1	1			4		1													1					1		3		1
TraesCS3A02G425600.1				1	1				1									1						1		1			1											1				5	1	2	1	1
TraesCS3A02G426200.1				1					1			1		1				1														1							1	2				1	3	4	1
TraesCS3A02G426400.1				1	5				1					2				1					2	3			1		1										2	3				7	3	1	5
TraesCS3A02G439700.1					2							1												1					1											2				4	3	2	4
TraesCS3B02G060000.1				1	3				3					2				1			7		1	2		2													1	2				3	3	3	1	2
TraesCS3B02G111000.1					1				1					2				1	1		1			2	1				4						1				1			1		2		2			1
TraesCS3B02G293600.1				1	6				3		1			1				1			1		2	2					1						2				1					2		10	1	1	1
TraesCS3B02G323600.1				1	3				2														1	1					1			1								2				3	2		3
TraesCS3B02G382600.1				2	1																		1	1			2		2			1								1			1	2	1	1	2
TraesCS3B02G394000.1					1				2								1				1	1	1	1			1																	3	1	2		3	1
TraesCS3B02G401200.1				1	1				3					4	1			1			1		1																	1				3	1	4
TraesCS3B02G409700.1				1	1				4					1				2		1				1		1																		2		1	1	1
TraesCS3B02G461900.1				1	1													2						1					1											2				3	2	1	1
TraesCS3B02G462000.1			1		3									1				1					2	2			1					1					1		1					2		2	1
TraesCS3B02G462500.1				1														1											1			1								3				1	3	1		1
TraesCS3B02G462600.1				1	3				1					2									1	3				1	1										1	1				5	1	1	3
TraesCS3B02G473700.1					2													1						1											1					1				3	1	2	3
TraesCS3D02G095600.1				2	1				1									2			1			1					1			1		1						1				3	1	2	2
TraesCS3D02G260700.1					4				1									3	1		1			2					1						1					1				1	1	7		1
TraesCS3D02G288700.1				2	3				4					1					1				1	4					1						1					1				2	2	4	1
TraesCS3D02G344000.1				1	3				1									1					1	2		1			2			2												2		2		1
TraesCS3D02G362300.1				1	3				4	1				3				1			1		2																	1				3	1	3
TraesCS3D02G370200.1									6					1				1		1						1													1	2				3	2		2
TraesCS3D02G420400.1		1		1	4							1		1				2					1	2		1			2											1				4	1	3	1	1
TraesCS3D02G421000.1				1	1		1	1						1				1					1	1					1			1							1	3				1	4	4		1
TraesCS3D02G421100.1				1	8									4		1		1					6	5					1			2												3		7	1
TraesCS3D02G421200.1				1	3				4					2									1	3				1	1										1	2	1			6	2	1	4
TraesCS3D02G432500.1				1	1							1				1								2											1					2				3	2	1	2
TraesCS4A02G034600.1				3	6			1	2					1		1	2	1	1				1	5			1			1			1				1									1
TraesCS4A02G161100.1														1				1											3			1						2	1					2		1	1	1
TraesCS4A02G162000.1					3				2														1	3															1							1
TraesCS4A02G174400.1	1				2									2				1						3					3													1		4		1	2		1
TraesCS4A02G174500.1					7		4	4	1								1							5		1	3		3			1			4					1				4		2		1	4
TraesCS4A02G174600.1					6		4	4						3				1						8			1					3			2									2	1	4	1		4
TraesCS4A02G290600.1				2					2									1					1	1																1				1	1	1	1		1
TraesCS4A02G338900.1					5		1		1					1									1	4		1																		2		3	1	1	1
TraesCS4A02G441400.1				2										3		1											1					1								5				8	6	3	3	1
TraesCS4B02G023600.1				2	1				2			1						1					1	1			2		1			1								1				1	1	1	1	1
TraesCS4B02G142800.1				2	2		1	1	1									1						3			1								1				1					2	2	2	2	1
TraesCS4B02G143100.1	1				6									2				1					1	4					2				1											3		1	1
TraesCS4B02G151200.1				1	2		2	2	1					1		1						1		2					1			1								1				4	1	2	3
TraesCS4B02G270600.1				2	5		1	1	2					4				1					1	5					1											3		1		6	3	3	2	1
TraesCS4B02G361300.1				1	4	1			2		1	1		7									1	4									1						1					1		2
TraesCS4D02G021200.1									1									1						2		1			1				1							1				2	1		1	1
TraesCS4D02G141100.1					3		2	2						4				1						5											1									2	1	3	1		1
TraesCS4D02G141200.1					2							1		2				1			1			3					3			2			1									3		1	2
TraesCS4D02G148400.1					2													1					1						2										1	1				2	2	2	4	1
TraesCS4D02G155700.1				1	5		2	1	1									2						3		1			1															1		1	2	1
TraesCS5A02G010000.1					7										1				1		1		3	3					1			4												5		2	3	1
TraesCS5A02G045900.1	1				1		1	1										3						2			1												2					1		2	1		2
TraesCS5A02G097000.1					5				3			1		4							2		3	2			1								2				1	3				2	3	5	1	1
TraesCS5A02G147800.1					6				1										2				1	3	2	1			1			1				1		1						4		2	3	2
TraesCS5A02G232200.1																			1							1					2								1	1		1		2	1	2	1	1	1
TraesCS5A02G282300.1				1	7													1					4	3					1															4	1		1	2
TraesCS5B02G007600.1					5		1	1	1			1											2	4					1													1		4		2	3	1
TraesCS5B02G090000.1					1				1							2								1			2		2												1			2		1
TraesCS5B02G197200.1				1	4		1	1			1	1		1		3		1	1				1	6					2										1	2		1		7	2	1	2
TraesCS5B02G281700.1					3				3									1					2	1	1		1																1	3		3	3
TraesCS5B02G548200.1	1				2		2	2						1			1	1						2					1			1							1					2		2	1
TraesCS5D02G014800.1				1	2																		2						2										3				1	2		5	1
TraesCS5D02G096000.1					6												1						2	6															4							7
TraesCS5D02G235800.1					1		2	1								1								1							1								1	1				4	1	2	1	1
TraesCS5D02G289400.1					3											1		2					1	2					1				1							1		1	1	3	2	1	2	1
TraesCS5D02G535300.1				1	5		1	1	1												1		1	7			1															1		2			1	1
TraesCS6A02G239000.1				2	1		1	1	2					2										1								3								1		1		2	1	1
TraesCS6A02G251200.1					2		1	1	2					2				1					1	1			1																1	3	1	5
TraesCS6A02G349700.1					9									2									3	6			1		2															1		1	1
TraesCS6B02G164200.1					1		1	1	1					4			1							1					1										1			2		7		3	2	1
TraesCS6B02G198800.1					5		1	1	2									1					1	5								1							2	1				5	1	2	1	1
TraesCS6B02G220900.1					2									1										1					1		2								1					1	2	1	1
TraesCS6B02G274100.4					2		1	1	2					2				1					1	1			1				1										1	1	1	3	1	6
TraesCS6B02G382800.1					7		2	3						4				1					1	7			2		1						1				1	1				2	1	1	1
TraesCS6D02G182400.1				1	1									1															1										1					2	2	1	1	1
TraesCS6D02G221300.1				1	2		1	1	1					4										1								3												3		1		1
TraesCS6D02G233000.1					2		1	1	2					2				1					1	1			1																1	4	1	4
TraesCS6D02G332200.1					5		2	2						1				2					2	4			1		1						1				1	1				4	1		2
TraesCS7A02G054700.2				1										4		1											2					2								5				10	6	3	4	2
TraesCS7A02G256500.1				2	7		1	1	5														3	3		1			2										2					2		1	1	1
TraesCS7A02G271500.1				1	3		1	1		1				1							1		1	2			2				1		1						2			1		2	2	5		1
TraesCS7A02G296500.1					3						1	1		1				1	1					2									1		1				1							1	1
TraesCS7A02G346700.1					3		1	1	3					1				1						3								2												3	1	2	3
TraesCS7B02G154000.1				1	3				2															5					1			1			3									2		1	2
TraesCS7B02G170500.4				1	4		1	1					1	2									1	2			1				1	2							1			1		2	2	4	1
TraesCS7B02G189000.1				1					1		1			3		1	1	1	1		2											1			2				2					1		3	1
TraesCS7D02G049800.1				1	1									2		1											2					1								5				7	6	3	3	1
TraesCS7D02G257900.1					1		1	1	4									1	1					3					1			1												2	1		1
TraesCS7D02G271800.1				2	2		1	1	1												1		1	2			1												1			1		1	2	3
TraesCS7D02G293200.1				1					1					2		1	1		1		1														1				1					1	1	3
TraesCS7D02G415800.1				2					6					2							3				1							2									2			4	2	3	1	2
TraesCSU02G068200.1					2		1	1	1									1			1			3					3			1							1					2		5	2		1
TraesCSU02G080300.1					2									1										1					1										1					2	2	2	1	1
sum	4	1	2	81	366	1	62	61	167	3	6	13	1	148	3	27	11	114	15	5	44	3	105	328	7	25	50	2	114	1	14	70	9	3	34	1	2	4	76	104	8	22	9	380	159	354	177	82	19
	1	2	3	4	5	6	7	8	9	10	11	12	13	14	15	16	17	18	19	20	21	22	23	24	25	26	27	28	29	30	31	32	33	34	35	36	37	38	39	40	41	42	43	44	45	46	47	48	49
Gene number	4	1	2	63	120	1	44	44	83	3	6	13	1	73	3	21	9	82	14	5	32	3	66	112	6	21	38	2	73	1	12	48	9	3	25	1	2	3	59	65	7	21	9	128	89	127	101	63	12
[truncated: 20 more columns]
